# Supplementary material for: An expeditious microwave assisted one-pot sequential route to pyrido fused imidazo[4,5-c] quinolines in green media
Source: Royal Society of Chemistry journal article supplement (doi:10.1039/d0nj05835a), 2021-01-01
Supplement: d0nj05835a1.pdf [file d0nj05835a1.pdf]

## **An Expeditious Microwave Assisted One-Pot Sequential Route to Pyridofused Imidazo[4,5-*c*] quinolines in Green Media**

R.Nishanth Rao, Kaushik Chanda\*

Department of Chemistry, School of Advanced Science, Vellore Institute of Technology,  
Vellore-632014, India.

Email: [chandakaushik1@gmail.com](mailto:chandakaushik1@gmail.com)

### **Contents**

|                                                                                              |             |
|----------------------------------------------------------------------------------------------|-------------|
| <b>1. General Procedure.....</b>                                                             | <b>2</b>    |
| <b>2. Spectral data of compounds 3 and 4 .....</b>                                           | <b>2-4</b>  |
| <b>3. Copies of <sup>1</sup>H, <sup>13</sup>CNMR, HRMS, and IR spectra of compounds.....</b> | <b>5-62</b> |

## Experimental Section

### General Procedure

Unless otherwise indicated all common reagents and solvents were used as obtained from commercial suppliers without further purification.  $^1\text{H}$  NMR (400 MHz) and  $^{13}\text{C}$  NMR (100 MHz) were recorded on a Bruker DRX400 spectrometer. Chemical shifts are reported in ppm relative to the internal solvent peak. Coupling constants,  $J$ , are given in Hz. Multiplicities of peaks are given as: d (doublet), m (multiplet), s (singlet), and t (triplet). Mass spectra were recorded on a Perkin Elmer Calrus 600 GC-MS spectrometer. IR spectra were recorded on a Bomem DA8 3FTS spectrometer. Microwave assisted reactions were carried out in a Catalyst Scientific Microwave oven system (Model No: CATA R (Catalyst System, Pune) operating at 2450 MHz equipped with glass vial extension by a condenser was used for performing the reaction. The microwave was equipped with a temperature control system (external probe).

#### **2-(2-nitrophenyl)imidazo[1,2-*a*]pyridine 3a.**

Yield = 0.36 g, 95%; Yellow solid;  $R_f$  = 0.5 (20%EtOAc/*n*-hexane);  $^1\text{H}$  NMR (400 MHz,  $\text{CDCl}_3$ )  $\delta$  8.10 (d,  $J$  = 6.76 Hz, 1H), 7.99 (d,  $J$  = 7.8 Hz, 1H), 7.76 (s, 1H), 7.71 (d,  $J$  = 8.04 Hz, 1H), 7.62 (t,  $J$  = 6.9 Hz, 2H), 7.45 (t,  $J$  = 7.8 Hz, 1H), 7.19 (t,  $J$  = 7.24 Hz, 1H), 6.80 (t,  $J$  = 6.76 Hz, 1H);  $^{13}\text{C}$  NMR (100 MHz,  $\text{CDCl}_3$ )  $\delta$  144.0, 140.0, 134.9, 126.5, 126.1, 123.2, 122.4, 120.5, 120.0, 118.2, 112.6, 107.6, 105.3; MS (GC-MS): 239; HRMS (EI,  $m/z$ ) calcd for  $\text{C}_{13}\text{H}_9\text{N}_3\text{O}_2$ :  $m/z$  239.0695; Found 239.0697; IR ( $\text{cm}^{-1}$ , KBr) 3149, 3020, 1519, 1354, 1276, 1193.

#### **2-(imidazo[1,2-*a*]pyridin-2-yl)aniline 4a.**

Yield = 0.415 g, 93%; white solid;  $R_f$  = 0.4 (20%EtOAc/*n*-hexane);  $^1\text{H}$  NMR (400 MHz,  $\text{CDCl}_3$ )  $\delta$  8.12 (d,  $J$  = 6.6 Hz, 1H), 7.80 (s, 1H), 7.57 (d,  $J$  = 9 Hz, 1H), 7.51 (d,  $J$  = 7.68 Hz, 1H), 7.16-7.09 (m, 2H) 6.79-6.70 (m, 3H);  $^{13}\text{C}$  NMR (100MHz,  $\text{CDCl}_3$ )  $\delta$  146.6, 145.8, 144.5, 128.9, 128.2, 125.2, 124.1, 117.3, 117.2, 116.8, 112.4, 108.3; MS (GC-MS) 209;

HRMS (EI, m/z) calcd for C<sub>13</sub>H<sub>11</sub>N<sub>3</sub>: m/z 209.0953; Found 209.0950; IR (cm<sup>-1</sup>, KBr) 3448, 3296, 1595, 1315, 937, 731.

**8-methyl-2-(2-nitrophenyl)imidazo[1,2-*a*]pyridine 3b.**

Yield = 0.435 g, 92%; white solid; R<sub>f</sub> = 0.5 (20%EtOAc/*n*-hexane); <sup>1</sup>H NMR (400 MHz, CDCl<sub>3</sub>) δ 8.01-7.90 (m, 2H), 7.71 (d, *J* = 8.8 Hz, 2H), 7.61 (t, *J* = 6.8 Hz, 1H), 7.45 (t, *J* = 7.6 Hz, 1H), 6.97 (d, *J* = 6.8 Hz, 1H), 6.71 (t, *J* = 6.8 Hz, 1H), 2.61 (3H); <sup>13</sup>C NMR (100MHz,CDCl<sub>3</sub>) δ 149.3, 145.9, 139.6, 131.8, 131.5, 128.3, 128.1, 127.9, 123.7, 123.5, 123.4, 112.8, 110.9, 16.9 MS (GC-MS) 253; HRMS (EI, m/z)calcd for C<sub>14</sub>H<sub>11</sub>N<sub>3</sub>O<sub>2</sub>: m/z 253.0851; Found 253.0835; IR (cm<sup>-1</sup>, KBr) 3059, 1658, 1554, 1315, 1423, 778.

**2-(8-methylimidazo[1,2-*a*]pyridin-2-yl)aniline 4b.**

Yield = 0.39 g, 95%; white solid; R<sub>f</sub> = 0.48 (20%EtOAc/*n*-hexane); <sup>1</sup>H NMR (400 MHz, CDCl<sub>3</sub>) δ 7.90 (d, *J* = 8 Hz, 1H), 7.70 (s, 1H), 7.44 (d, *J* = 7.6 Hz, 1H), 7.03 (t, *J* = 8 Hz, 1H), 6.86 (d, *J* = 8.4 Hz, 1H), 6.68 (d, *J* = 8.4 Hz, 1H), 6.67-6.58 (m, 2H), 2.53 (3H); <sup>13</sup>C NMR (100MHz,CDCl<sub>3</sub>) δ 145.9, 145.0, 128.7, 128.0, 127.1, 123.0, 122.9, 117.2, 116.8, 116.8, 112.4, 108.6, 16.9; MS (GC-MS) 223; HRMS (EI, m/z)calcd for C<sub>14</sub>H<sub>13</sub>N<sub>3</sub>: m/z 223.1109; Found 223.1109; IR (cm<sup>-1</sup>, KBr) 3057, 1604, 1463, 773, 729.

**7-methyl-2-(2-nitrophenyl)imidazo[1,2-*a*]pyridine 3c**

Yield = 0.43 g, 91%; white solid; R<sub>f</sub> = 0.51 (20%EtOAc/*n*-hexane); <sup>1</sup>H NMR (400 MHz, CDCl<sub>3</sub>) δ 8.20 (d, *J* = 8 Hz, 1H), 7.89 (d, *J* = 7.2 Hz, 1H), 7.88-7.76 (m, 2H), 7.68 (d, *J* = 7.2 Hz, 1H) 7.51 (d, *J* = 6.8 Hz, 1H), 7.31 (d, *J* = 6.8 Hz, 1H), 6.68 (d, *J* = 6.91 Hz, 1H), 2.83 (3H); <sup>13</sup>C NMR(100MHz,CDCl<sub>3</sub>) δ 148.1, 146.8, 134.2, 131.7, 130.6, 128.8, 128.4, 126.8, 125.2, 123.5, 122.9, 122.0, 112.6, 17.6; MS (GC-MS) 253; HRMS (EI, m/z)calcd for C<sub>14</sub>H<sub>11</sub>N<sub>3</sub>O<sub>2</sub>: m/z 253.0851; Found 253.0841; IR (cm<sup>-1</sup>, KBr) 3057, 1718, 1589, 1460, 796.

**2-(7-methylimidazo[1,2-*a*]pyridin-2-yl)aniline 4c.**

Yield: 0.372 g, 90%; white solid;  $R_f = 0.45$  (20%EtOAc/*n*-hexane);  $^1\text{H NMR}$  (400 MHz,  $\text{CDCl}_3$ )  $\delta$  8.0 (d,  $J = 6.8$  Hz, 1H), 7.72 (s, 1H), 7.50 (d,  $J = 7.6$  Hz, 1H), 7.34 (s, 1H), 7.10 (t,  $J = 8.4$  Hz, 1H), 6.72 (t,  $J = 6.1$  Hz, 2H), 6.62 (d,  $J = 6.8$  Hz, 1H), 2.39 (3H);  $^{13}\text{C NMR}$  (100MHz,  $\text{CDCl}_3$ )  $\delta$  135.2, 128.7, 128.1, 124.4, 117.3, 116.9, 116.7, 115.6, 115.1, 107.7, 21.3; MS (GC-MS) 223; HRMS (EI,  $m/z$ ) calcd for  $\text{C}_{14}\text{H}_{13}\text{N}_3$ :  $m/z$  223.1109; Found 223.1101; IR ( $\text{cm}^{-1}$ , KBr) 3414, 1712, 1604, 1456, 769.

**6,8-difluoro-2-(2-nitrophenyl)imidazo[1,2-*a*]pyridine 3d.**

Yield = 0.375 g, 89 %; white solid;  $R_f = 0.4$  (20%EtOAc/*n*-hexane);  $^1\text{H NMR}$  (400 MHz,  $\text{CDCl}_3$ )  $\delta$  8.14 (d,  $J = 8.32$  Hz, 2H), 7.72 (t,  $J = 7.48$  Hz, 2H), 7.61 (t,  $J = 7.32$  Hz, 1H), 7.43 (d,  $J = 7.4$  Hz, 2H);  $^{13}\text{C NMR}$  (100MHz,  $\text{CDCl}_3$ )  $\delta$  158.1, 156.5, 145.3, 135.1, 134.9, 134.7, 131.8, 129.1, 128.1, 127.8, 124.8, 124.4; MS (GC-MS) 275; HRMS (EI,  $m/z$ ) calcd for  $\text{C}_{13}\text{H}_7\text{F}_2\text{N}_3\text{O}_2$ :  $m/z$  275.0506; Found 275.0500; IR ( $\text{cm}^{-1}$ , KBr) 2814, 1627, 147, 1180, 781.

**2-(6,8-difluoroimidazo[1,2-*a*]pyridin-2-yl)aniline 4d.**

Yield = 0.345 g, 91%; white solid;  $R_f = 0.42$  (20%EtOAc/*n*-hexane);  $^1\text{H NMR}$  (400 MHz,  $\text{CDCl}_3$ )  $\delta$  8.01 (d,  $J = 6.4$  Hz, 2H), 7.95 (s, 2H), 7.68-7.64 (m, 1H), 7.36 (t,  $J = 7.2$  Hz, 1H), 6.89 (t,  $J = 8$  Hz, 1H);  $^{13}\text{C NMR}$  (100MHz,  $\text{CDCl}_3$ )  $\delta$  149.5, 146.9, 139.9, 132.0, 131.4, 130.1, 129.4, 128.1, 124.6, 110.7; MS (GC-MS) 245; HRMS (EI,  $m/z$ ) calcd for  $\text{C}_{14}\text{H}_{13}\text{N}_3$ :  $m/z$  245.0765; Found 245.0750; IR ( $\text{cm}^{-1}$ , KBr) 3369, 2872, 1618, 1435, 769, 750.

Signature SIF VIT VELLORE  
KC-816-02

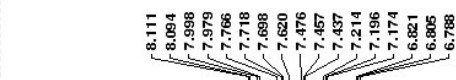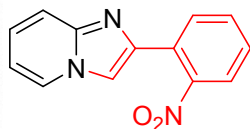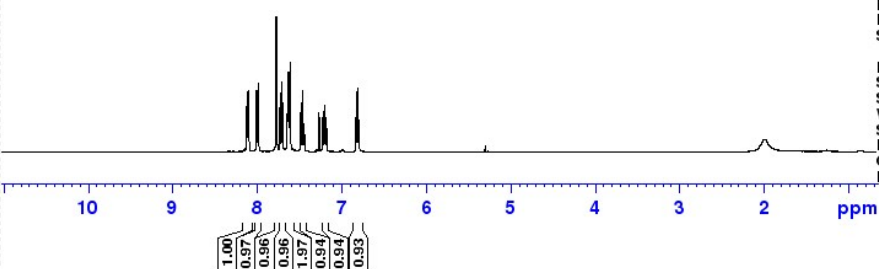

Current Data Parameters  
NAME KC-816-02-H1-NMR  
EXPNO 11  
PROCNO 1

F2 - Acquisition Parameters  
Date\_ 20160826  
Time 10.04  
INSTRUM spect  
PROBHD 5 mm PABBO BB/  
PULPROG zg30  
TD 65536  
SOLVENT DMSO  
NS 16  
DS 2  
SWH 8223.685 Hz  
FIDRES 0.125483 Hz  
AQ 3.9845889 sec  
RG 156.91  
DW 60.800 usec  
DE 6.50 usec  
TE 300.0 K  
D1 1.00000000 sec  
TD0 1

===== CHANNEL f1 =====  
NUC1 1H  
P1 14.25 usec  
PLW1 14.0000000 W  
SFO1 400.2604718 MHz

F2 - Processing parameters  
SI 65536  
SF 400.2561111 MHz  
WDW EM  
SSB 0  
LB 0.30 Hz  
GB 0  
PC 1.00

Signature SIF VIT VELLORE  
KC-816-02

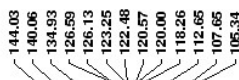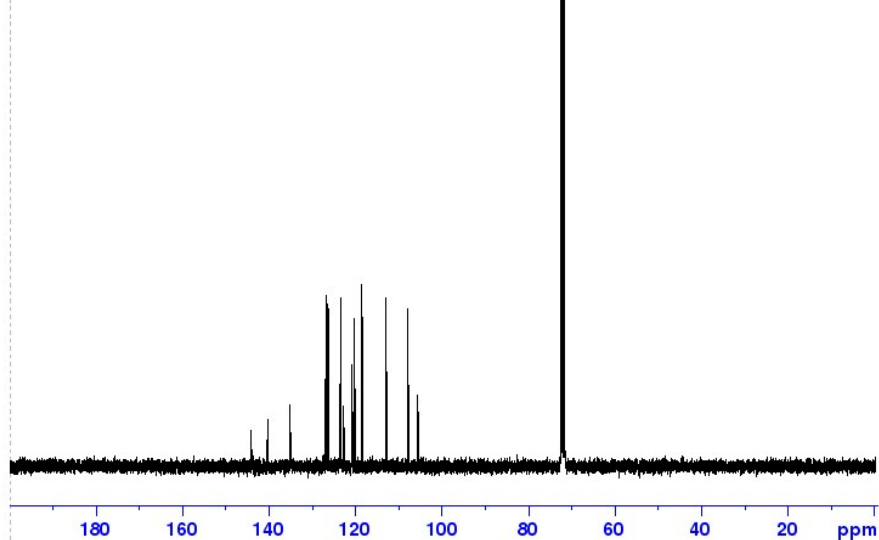

Current Data Parameters  
NAME KC-816-02-13C-NMR  
EXPNO 12  
PROCNO 1

F2 - Acquisition Parameters  
Date\_ 20160826  
Time 10.34  
INSTRUM spect  
PROBHD 5 mm PABBO BB/  
PULPROG zgpg30  
TD 65536  
SOLVENT DMSO  
NS 512  
DS 4  
SWH 24038.461 Hz  
FIDRES 0.366798 Hz  
AQ 1.3631488 sec  
RG 199.6  
DW 20.800 usec  
DE 6.50 usec  
TE 300.9 K  
D1 2.00000000 sec  
D11 0.03000000 sec  
TD0 1

===== CHANNEL f1 =====  
NUC1 13C  
P1 9.80 usec  
PLW1 58.0000000 W  
SFO1 100.6550182 MHz

===== CHANNEL f2 =====  
CPDPRG2 waltz16  
NUC2 1H  
PCPD2 90.00 usec  
PLW2 14.0000000 W  
PLW12 0.35097000 W  
PLW13 0.28428999 W  
SFO2 400.2596010 MHz

F2 - Processing parameters  
SI 32768  
SF 100.6450043 MHz  
WDW EM

<sup>1</sup>H-NMR and <sup>13</sup>C-NMR of compound **3a** in CDCl<sub>3</sub>

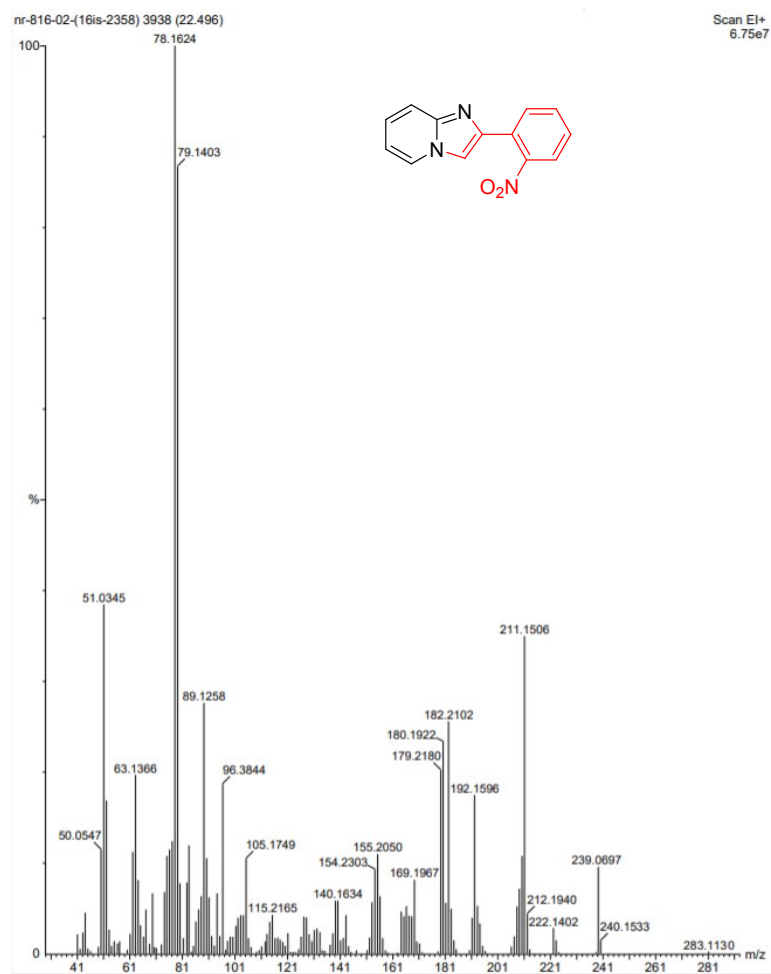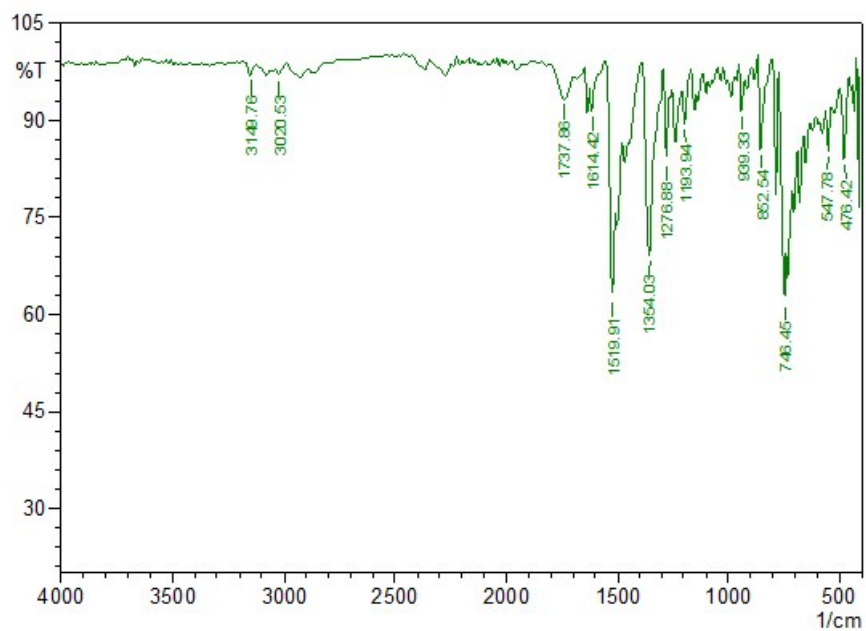

Mass and IR of Compound **3a**

Signature SIF VIT VELLORE  
KC-816-03

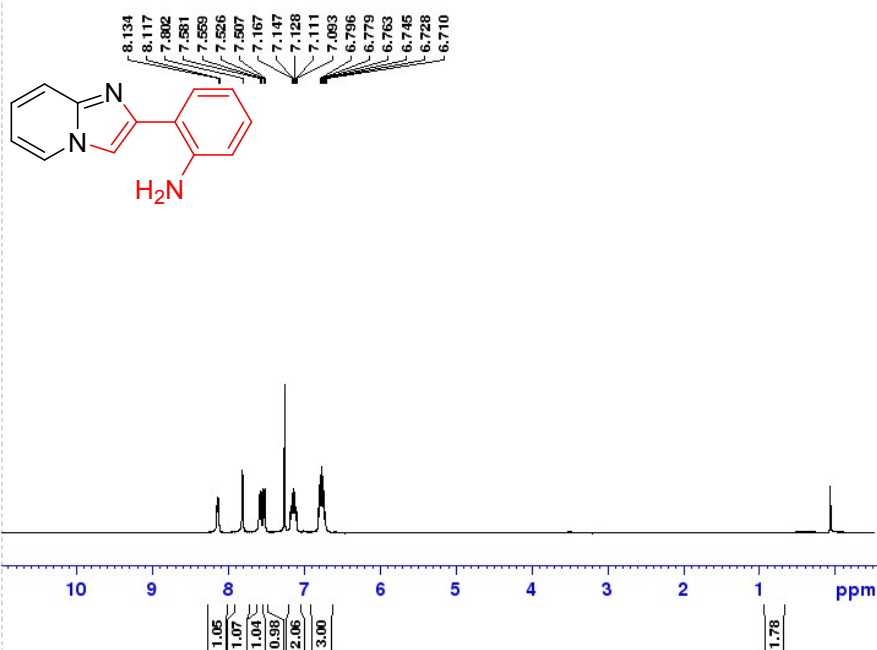

Current Data Parameters  
NAME Amino  
EXPNO 2  
PROCNO 1

F2 - Acquisition Parameters  
Date\_ 20160902  
Time 11.32  
INSTRUM spect  
PROBHD 5 mm PABBO BB/  
PULPROG zg30  
TD 65536  
SOLVENT CDCl3  
NS 16  
DS 2  
SWH 8223.685 Hz  
FIDRES 0.125483 Hz  
AQ 3.9845889 sec  
RG 175.97  
DW 60.800 usec  
DE 6.50 usec  
TE 299.5 K  
D1 1.0000000 sec  
TD0 1

===== CHANNEL f1 =====  
NUC1 1H  
P1 14.25 usec  
PLW1 14.0000000 W  
SFO1 400.2604718 MHz

F2 - Processing parameters  
SI 65536  
SF 400.2580175 MHz  
WDW EM  
SSB 0  
LB 0.30 Hz  
GB 0  
PC 1.00

Signature SIF VIT VELLORE  
NR-916-03

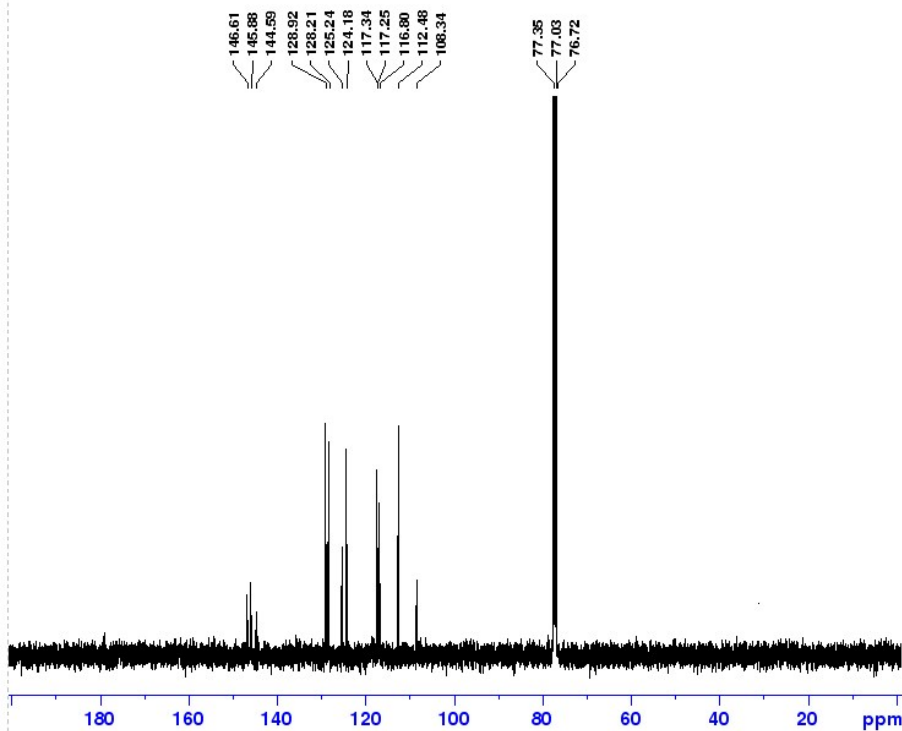

Current Data Parameters  
NAME Amino  
EXPNO 12  
PROCNO 1

F2 - Acquisition Parameters  
Date\_ 20160916  
Time 14.45  
INSTRUM spect  
PROBHD 5 mm PABBO BB/  
PULPROG zgpg30  
TD 65536  
SOLVENT CDCl3  
NS 512  
DS 4  
SWH 24038.461 Hz  
FIDRES 0.366798 Hz  
AQ 1.3631488 sec  
RG 156.91  
DW 20.800 usec  
DE 6.50 usec  
TE 300.5 K  
D1 2.0000000 sec  
D11 0.0300000 sec  
TD0 1

===== CHANNEL f1 =====  
NUC1 13C  
P1 9.80 usec  
PLW1 58.0000000 W  
SFO1 100.6550182 MHz

===== CHANNEL f2 =====  
CPDPRG[2] waltz16  
NUC2 1H  
PCPD2 90.00 usec  
PLW2 14.0000000 W  
PLW12 0.35097000 W  
PLW13 0.28428999 W  
SFO2 400.2596010 MHz

F2 - Processing parameters  
SI 32768  
SF 100.6449540 MHz  
WDW EM

$^1\text{H-NMR}$  and  $^{13}\text{C-NMR}$  of compound **4a** in  $\text{CDCl}_3$ .

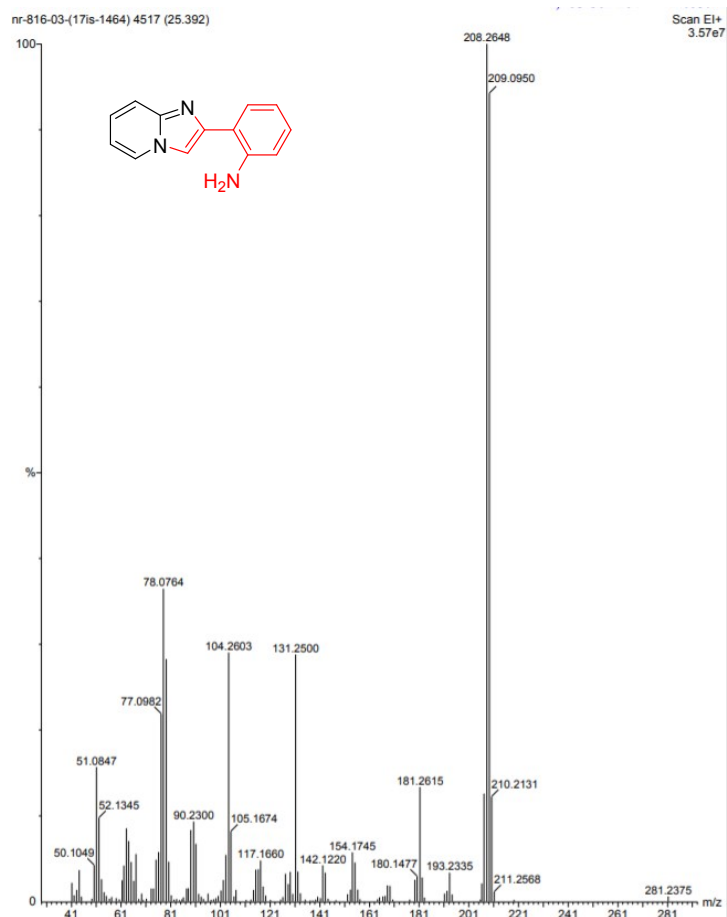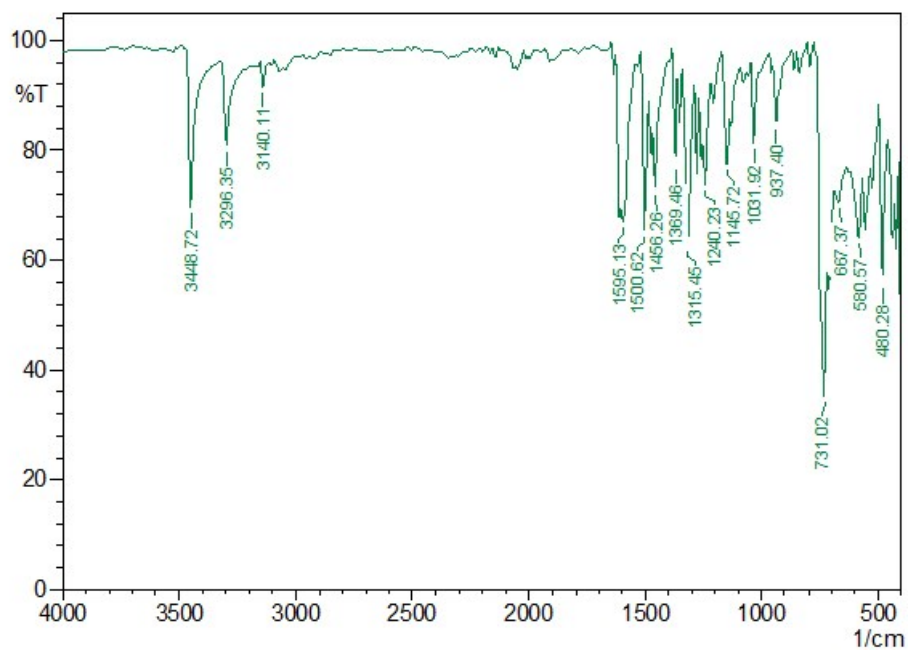

Mass and IR of Compound 4a.



Signature SIF VIT VELLORE  
NR-517-3-ME-NO

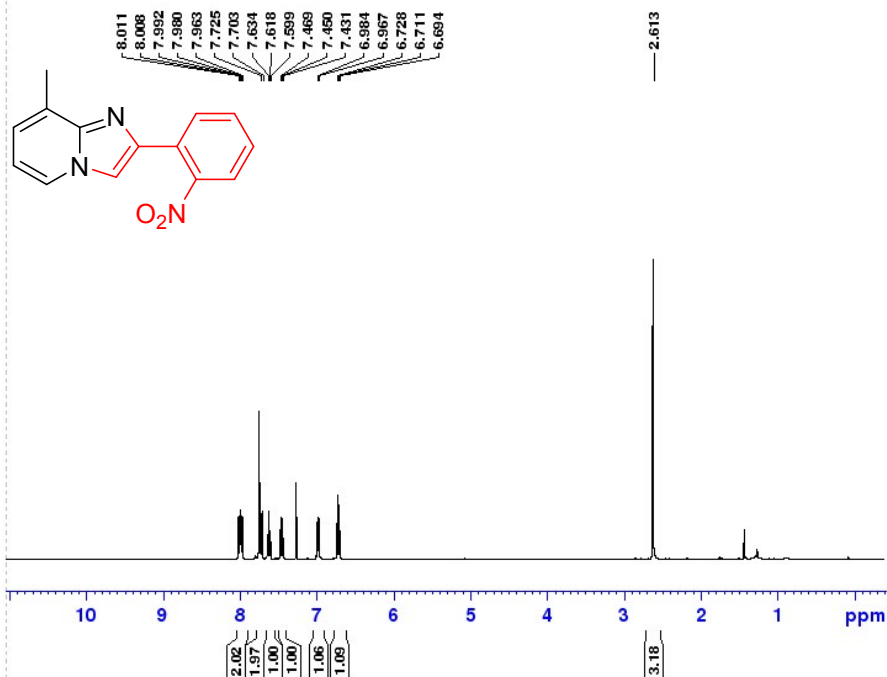

Current Data Parameters  
NAME NITRO AND AMINE  
EXPNO 31  
PROCNO 1

F2 - Acquisition Parameters  
Date\_ 20170516  
Time 17.44 h  
INSTRUM spect  
PROBHD Z108618\_0505 (  
PULPROG zg30  
TD 65536  
SOLVENT CDCl3  
NS 16  
DS 2  
SWH 8012.820 Hz  
FIDRES 0.244532 Hz  
AQ 4.0894465 sec  
RG 175.97  
DW 62.400 usec  
DE 6.50 usec  
TE 300.9 K  
D1 1.00000000 sec  
TD0 1  
SFO1 400.2604716 MHz  
NUC1 1H  
P1 14.25 usec  
PLW1 14.00000000 W

F2 - Processing parameters  
SI 65536  
SF 400.2580099 MHz  
WDW EM  
SSB 0  
LB 0.30 Hz  
GB 0  
PC 1.00

Signature SIF VIT VELLORE  
NR-517-3-ME-NO

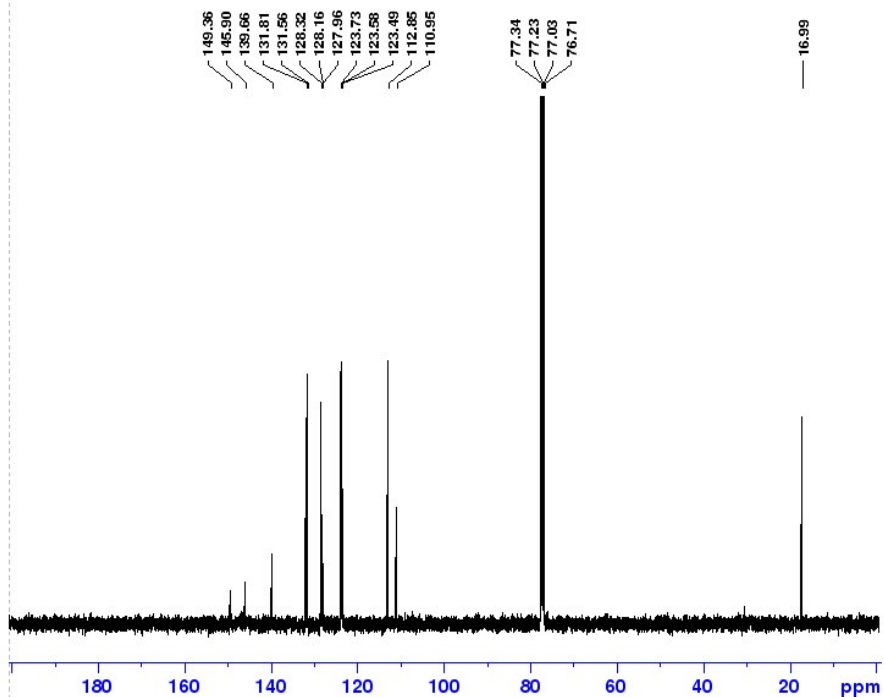

Current Data Parameters  
NAME NITRO AND AMINE  
EXPNO 32  
PROCNO 1

F2 - Acquisition Parameters  
Date\_ 20170516  
Time 18.14 h  
INSTRUM spect  
PROBHD Z108618\_0505 (  
PULPROG zgpg30  
TD 65536  
SOLVENT CDCl3  
NS 512  
DS 4  
SWH 24038.461 Hz  
FIDRES 0.733596 Hz  
AQ 1.3631488 sec  
RG 112.69  
DW 20.800 usec  
DE 6.50 usec  
TE 301.4 K  
D1 2.00000000 sec  
D11 0.03000000 sec  
TD0 1  
SFO1 100.6550186 MHz  
NUC1 13C  
P1 9.80 usec  
PLW1 58.0000000 W  
SFO2 400.2596010 MHz  
NUC2 1H  
CPDPRG2 waltz16  
PCPD2 90.00 usec  
PLW2 14.00000000 W  
PLW12 0.35097000 W  
PLW13 0.17654000 W

F2 - Processing parameters  
SI 32768  
SF 100.6449542 MHz  
WDW EM  
SSB 0  
LB 1.00 Hz  
GB 0  
PC 1.40

$^1\text{H}$ -NMR and  $^{13}\text{C}$ -NMR of compound **3b** in  $\text{CDCl}_3$ .

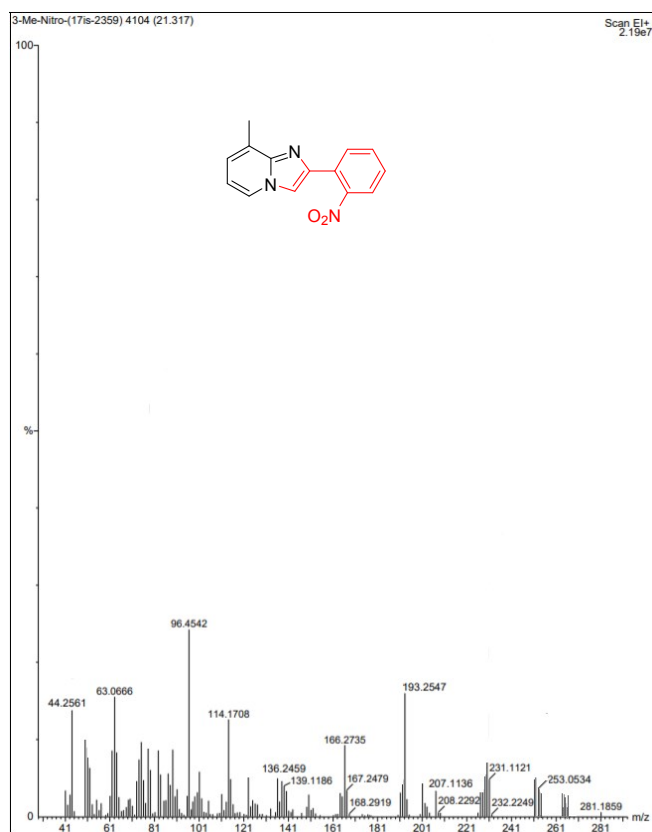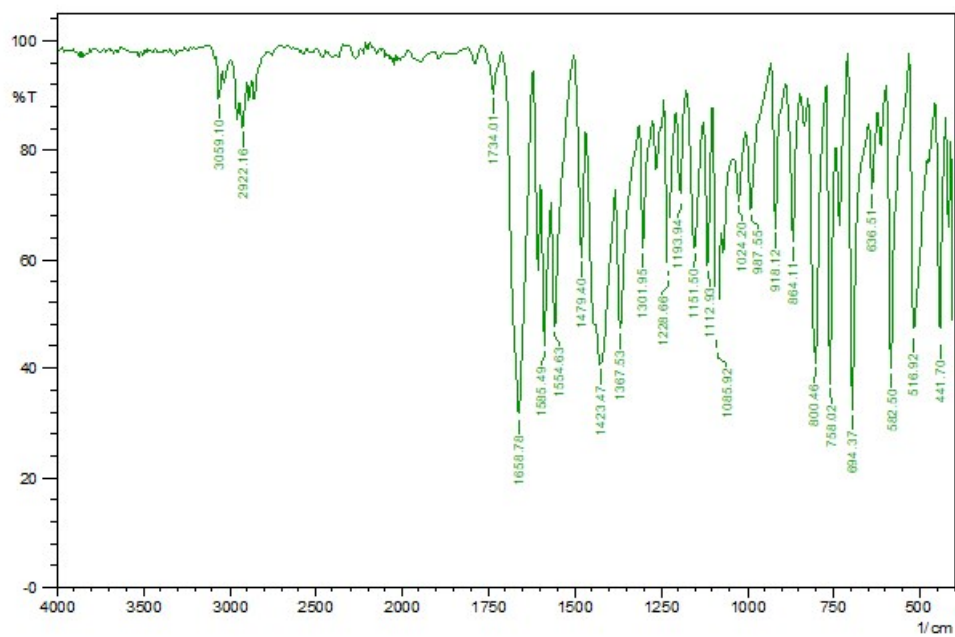

Mass and IR of Compound **3b**.

Signature SIF VIT VELLORE  
NR-517-3-ME-NH

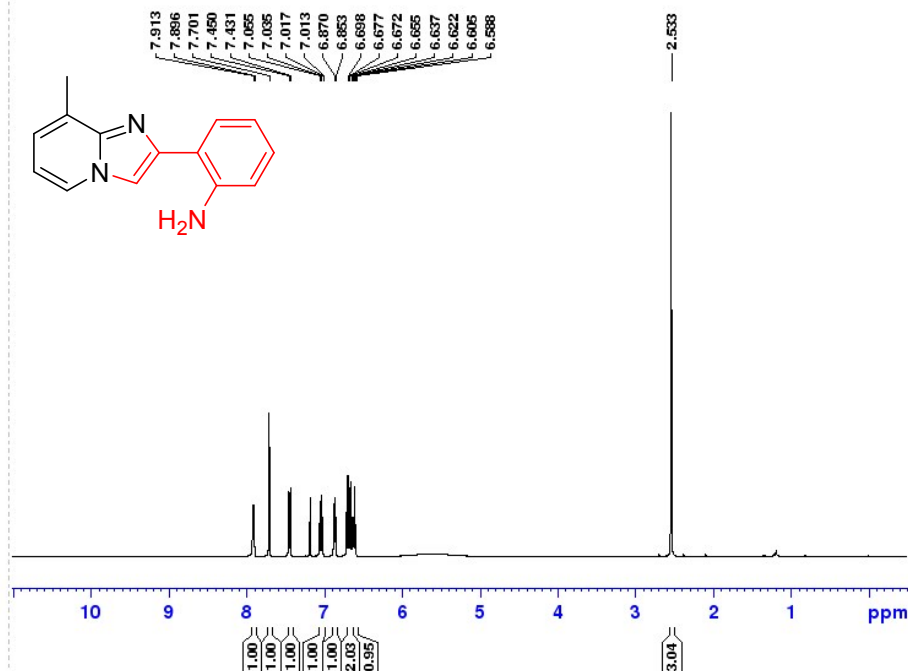

Current Data Parameters  
NAME NITRO AND AMINE  
EXPNO 33  
PROCNO 1

F2 - Acquisition Parameters  
Date\_ 20170516  
Time 18.18 h  
INSTRUM spect  
PROBHD Z108618\_0505 (  
PULPROG zg30  
TD 65536  
SOLVENT CDCl3  
NS 16  
DS 2  
SWH 8012.820 Hz  
FIDRES 0.244532 Hz  
AQ 4.0694465 sec  
RG 143.73  
DW 62.400 usec  
DE 6.50 usec  
TE 300.7 K  
D1 1.0000000 sec  
TD0 1  
SFO1 400.2604716 MHz  
NUC1 1H  
P1 14.25 usec  
PLW1 14.0000000 W

F2 - Processing parameters  
SI 65536  
SF 400.2580433 MHz  
WDW EM  
SSB 0  
LB 0.30 Hz  
GB 0  
PC 1.00

Signature SIF VIT VELLORE  
NR-517-3-ME-NH

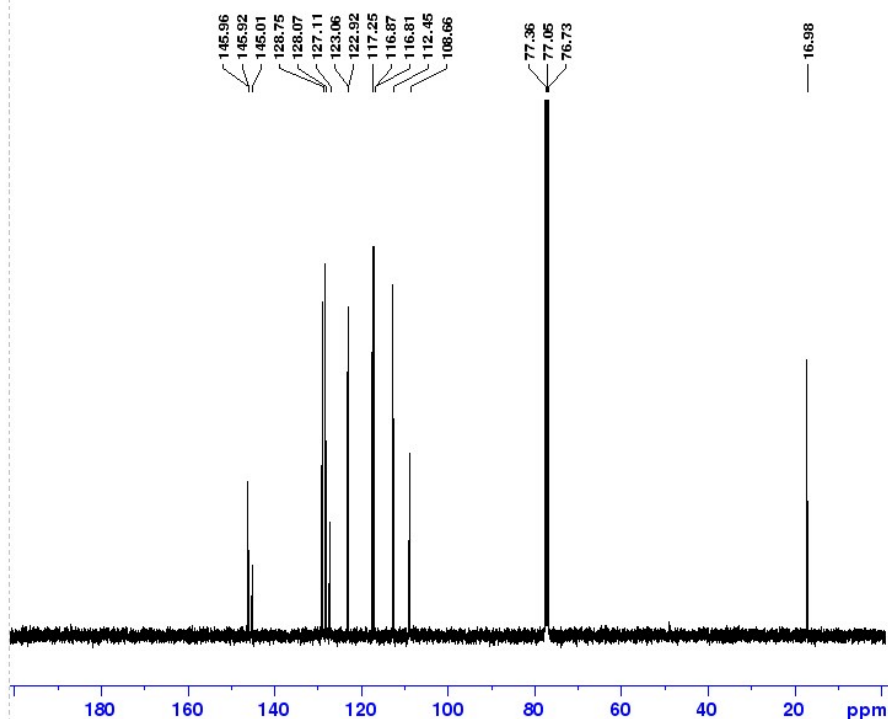

Current Data Parameters  
NAME NITRO AND AMINE  
EXPNO 34  
PROCNO 1

F2 - Acquisition Parameters  
Date\_ 20170516  
Time 18.48 h  
INSTRUM spect  
PROBHD Z108618\_0505 (  
PULPROG zgpg30  
TD 65536  
SOLVENT CDCl3  
NS 512  
DS 4  
SWH 24038.461 Hz  
FIDRES 0.733596 Hz  
AQ 1.3631488 sec  
RG 88.69  
DW 20.800 usec  
DE 6.50 usec  
TE 302.2 K  
D1 2.0000000 sec  
D11 0.0300000 sec  
TD0 1  
SFO1 100.6550186 MHz  
NUC1 13C  
P1 9.80 usec  
PLW1 58.0000000 W  
SFO2 400.2596010 MHz  
NUC2 1H  
CPDPRG[2] waltz16  
PCPD2 90.00 usec  
PLW2 14.0000000 W  
PLW12 0.35097000 W  
PLW13 0.17654000 W

F2 - Processing parameters  
SI 32768  
SF 100.6449542 MHz  
WDW EM  
SSB 0  
LB 1.00 Hz  
GB 0  
PC 1.40

<sup>1</sup>H-NMR and <sup>13</sup>C-NMR of compound **4b** in CDCl<sub>3</sub>.

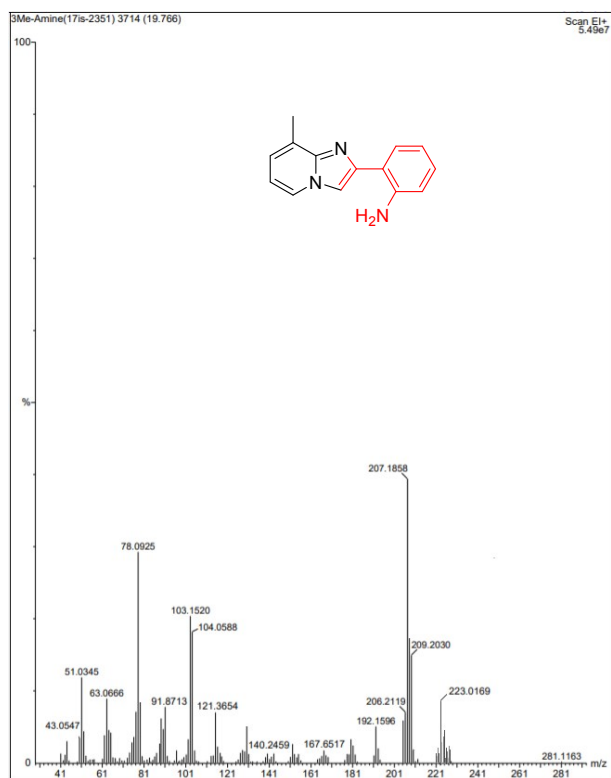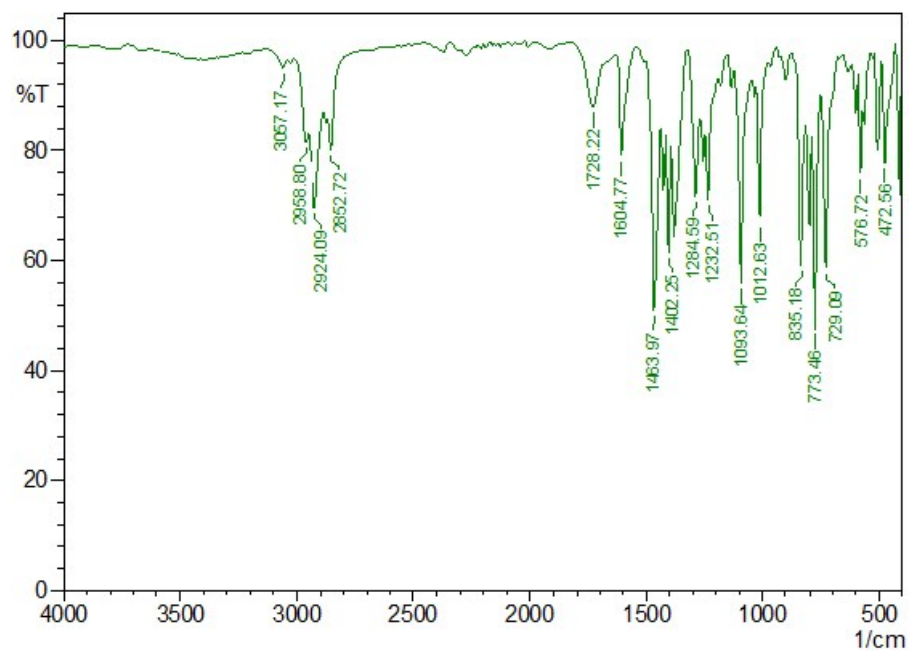

Mass and IR of Compound **4b**

Signature SIF VIT VELLORE  
NR-S77-NITRO

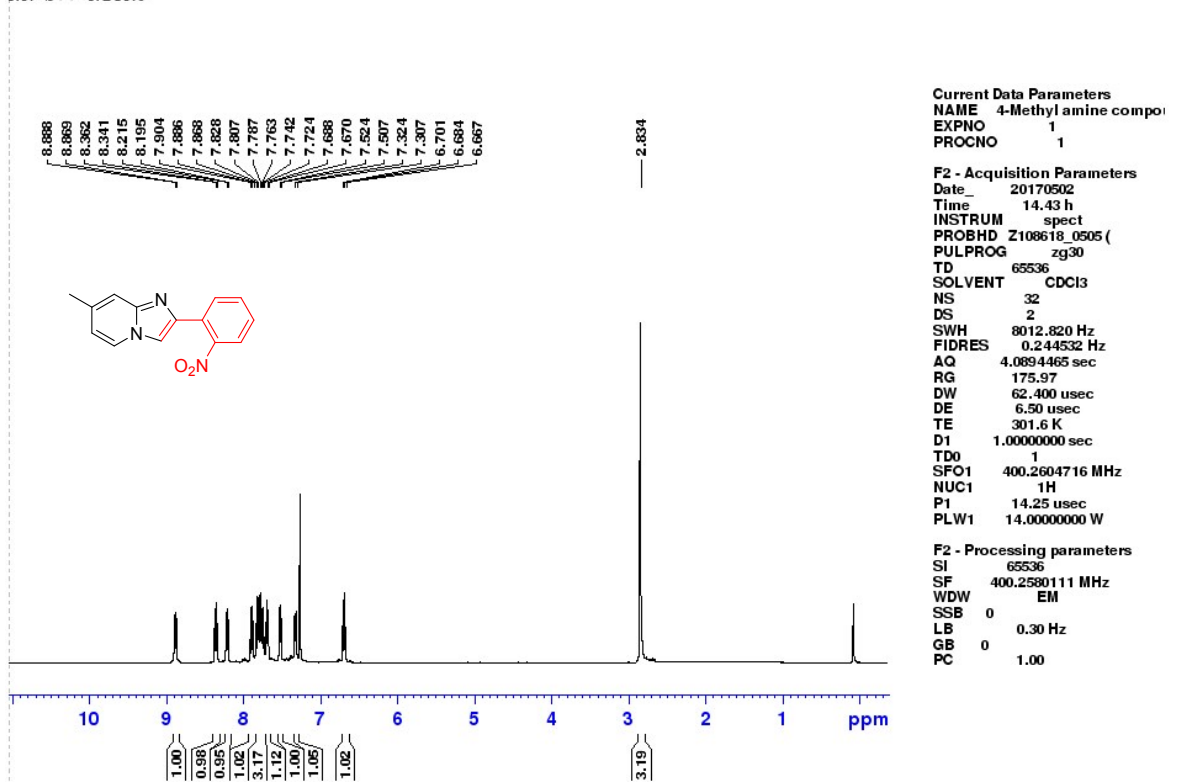

Signature SIF VIT VELLORE  
NR-S77-NITRO

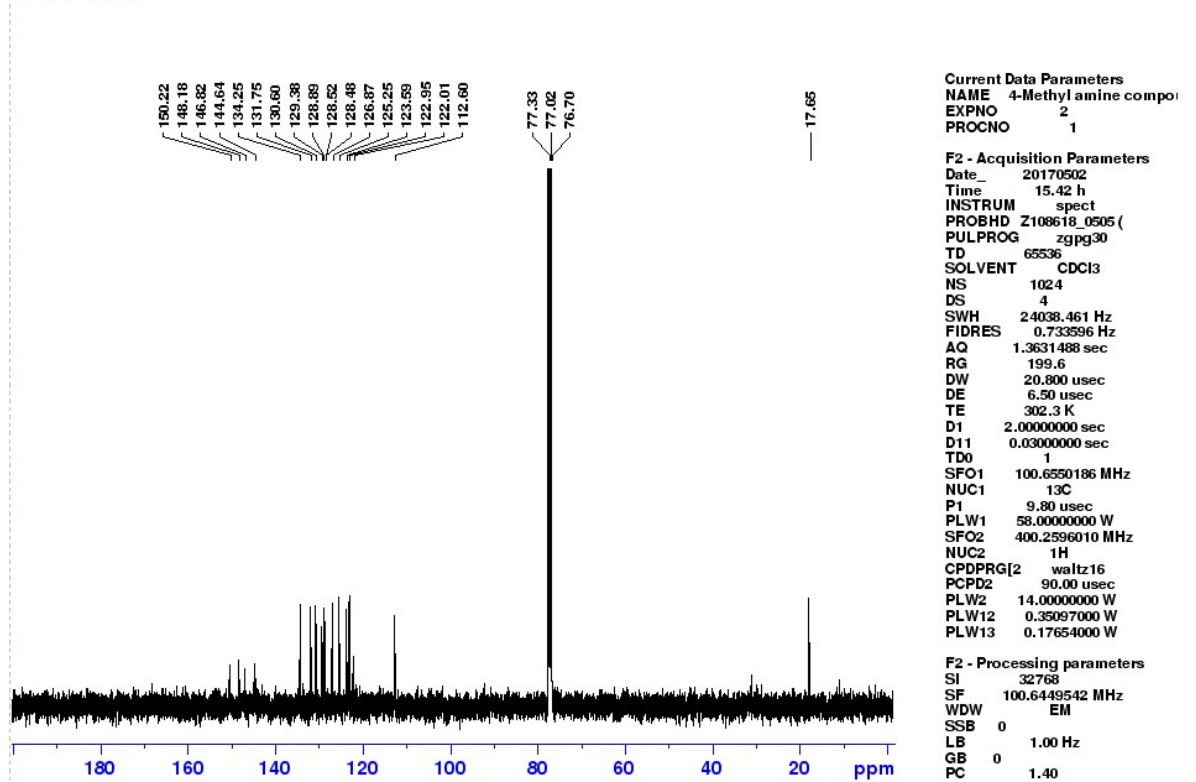

$^1\text{H-NMR}$  and  $^{13}\text{C-NMR}$  of compound **3c** in  $\text{CDCl}_3$ .

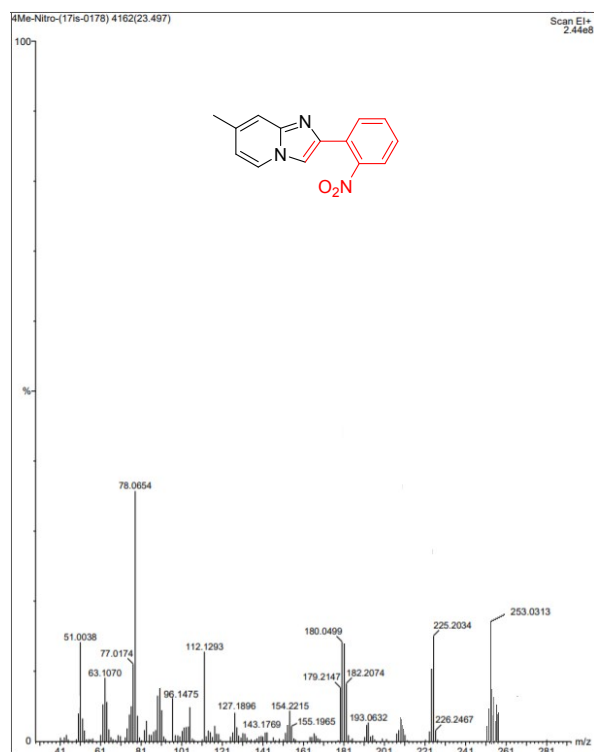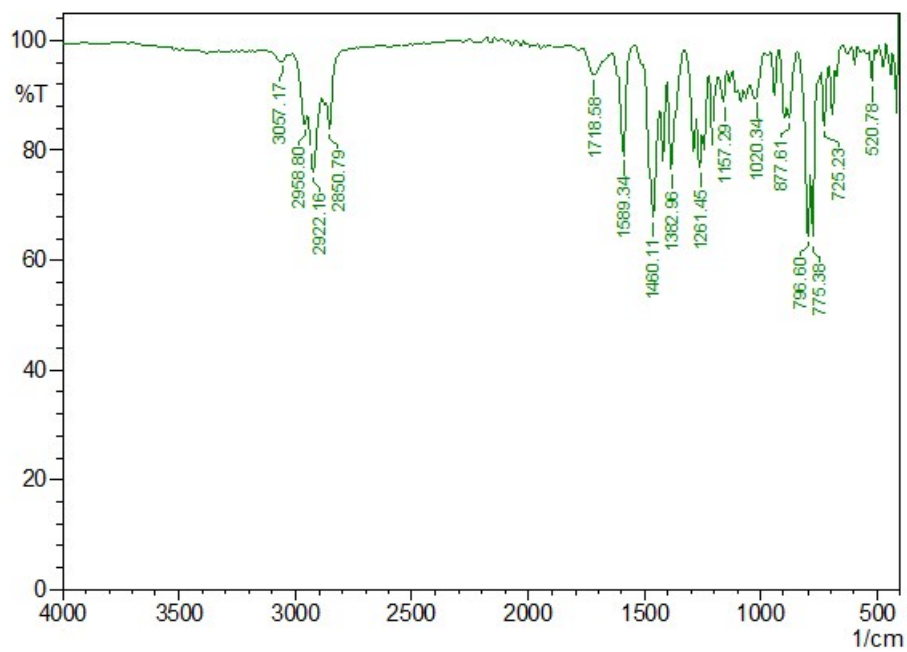

Mass and IR of Compound 3c.

Signature SIF VIT VELLORE  
NR-517-PCT-AM

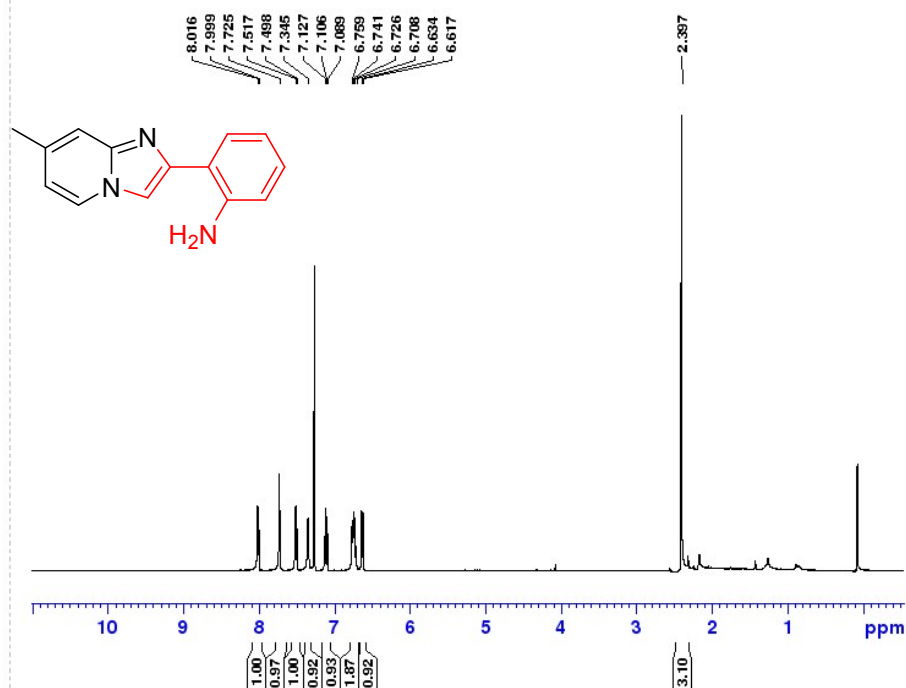

Current Data Parameters  
NAME 4-Methyl amine compo  
EXPNO 7  
PROCNO 1

F2 - Acquisition Parameters  
Date\_ 20170505  
Time 15.19 h  
INSTRUM spect  
PROBHD Z108618\_0505 (  
PULPROG zg30  
TD 65536  
SOLVENT CDCl3  
NS 16  
DS 2  
SWH 8012.820 Hz  
FIDRES 0.244532 Hz  
AQ 4.0894465 sec  
RG 199.6  
DW 62.400 usec  
DE 6.50 usec  
TE 300.4 K  
D1 1.00000000 sec  
TD0 1  
SFO1 400.2604716 MHz  
NUC1 1H  
P1 14.25 usec  
PLW1 14.00000000 W

F2 - Processing parameters  
SI 65536  
SF 400.2580111 MHz  
WDW EM  
SSB 0  
LB 0.30 Hz  
GB 0  
PC 1.00

Signature SIF VIT VELLORE  
NR-517-PCT-AM

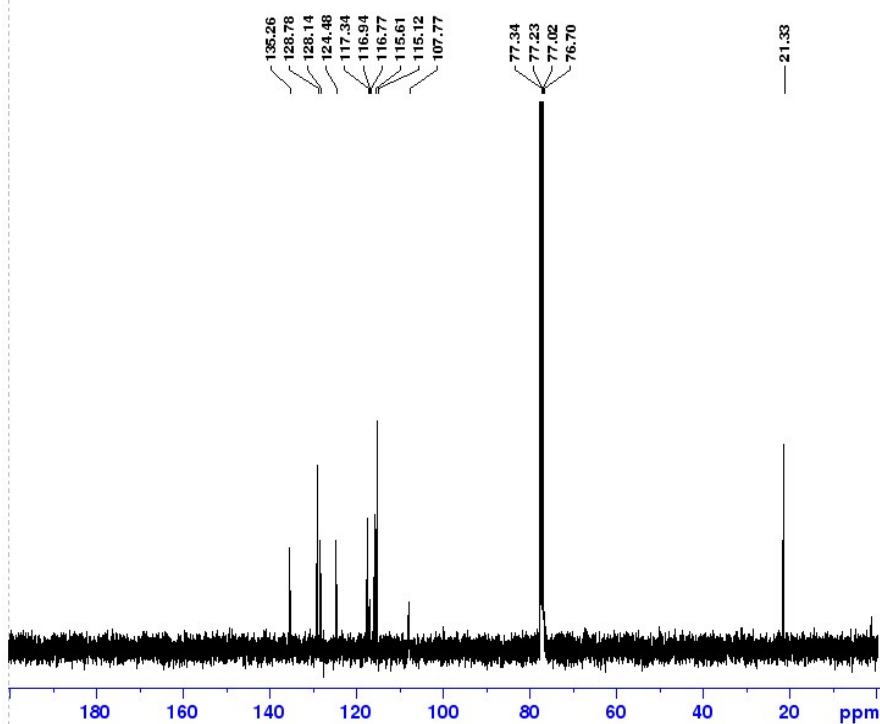

Current Data Parameters  
NAME 4-Methyl amine compo  
EXPNO 8  
PROCNO 1

F2 - Acquisition Parameters  
Date\_ 20170505  
Time 16.50 h  
INSTRUM spect  
PROBHD Z108618\_0505 (  
PULPROG zgpg30  
TD 65536  
SOLVENT CDCl3  
NS 838  
DS 4  
SWH 24038.461 Hz  
FIDRES 0.733596 Hz  
AQ 1.3631488 sec  
RG 156.91  
DW 20.800 usec  
DE 6.50 usec  
TE 301.3 K  
D1 2.00000000 sec  
D11 0.03000000 sec  
TD0 1  
SFO1 100.6550186 MHz  
NUC1 13C  
P1 9.80 usec  
PLW1 58.00000000 W  
SFO2 400.2596010 MHz  
NUC2 1H  
CPDPRG[2] waltz16  
PCPD2 90.00 usec  
PLW2 14.00000000 W  
PLW12 0.35097000 W  
PLW13 0.17654000 W

F2 - Processing parameters  
SI 32768  
SF 100.6449542 MHz  
WDW EM  
SSB 0  
LB 1.00 Hz  
GB 0  
PC 1.40

<sup>1</sup>H-NMR and <sup>13</sup>C-NMR of compound 4c in CDCl<sub>3</sub>.

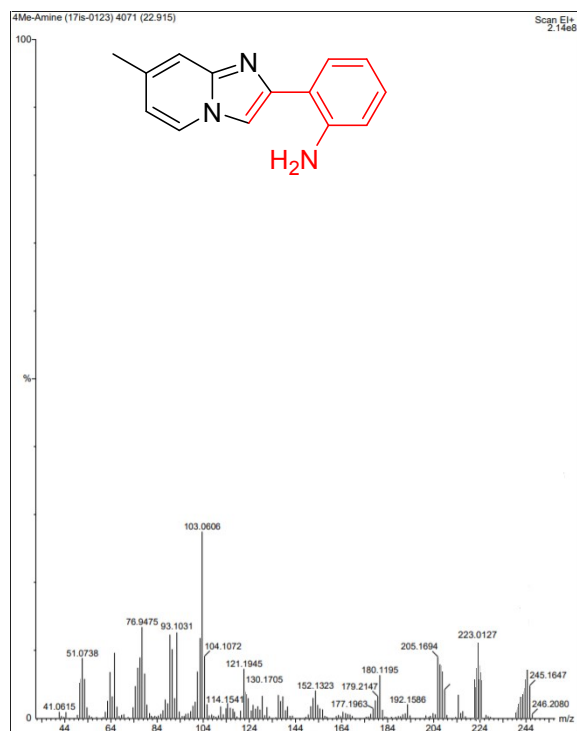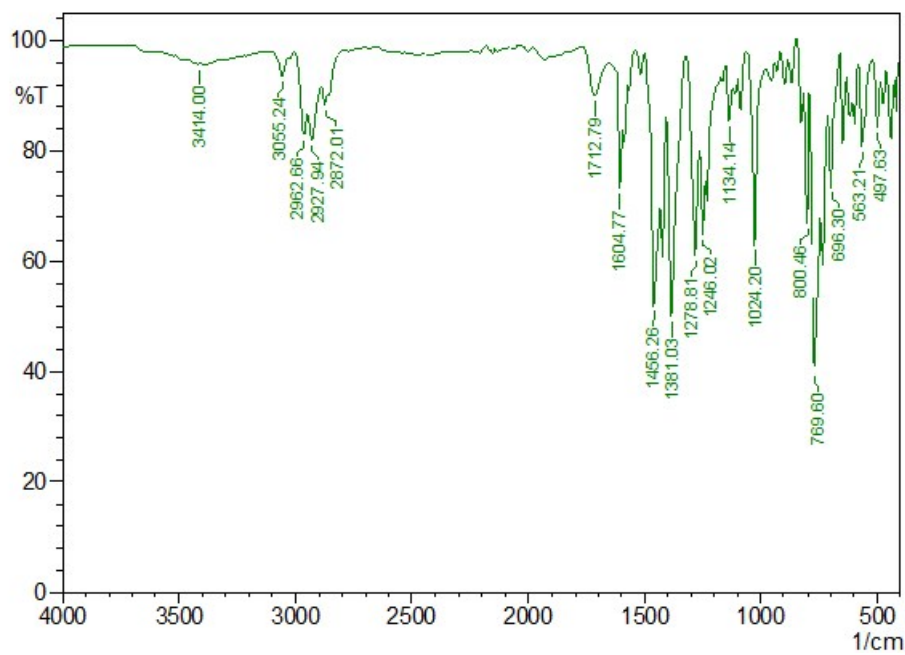

Mass and IR of Compound **4c**.



Signature SIF VIT VELLORE  
NR-717-DF-N

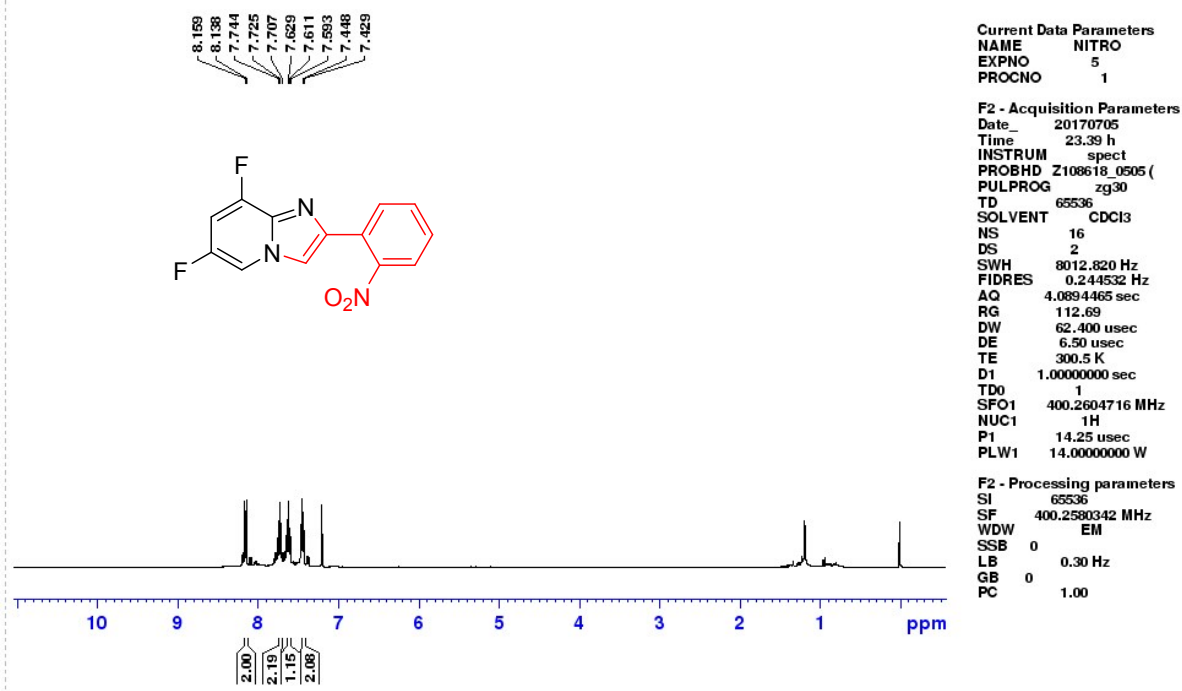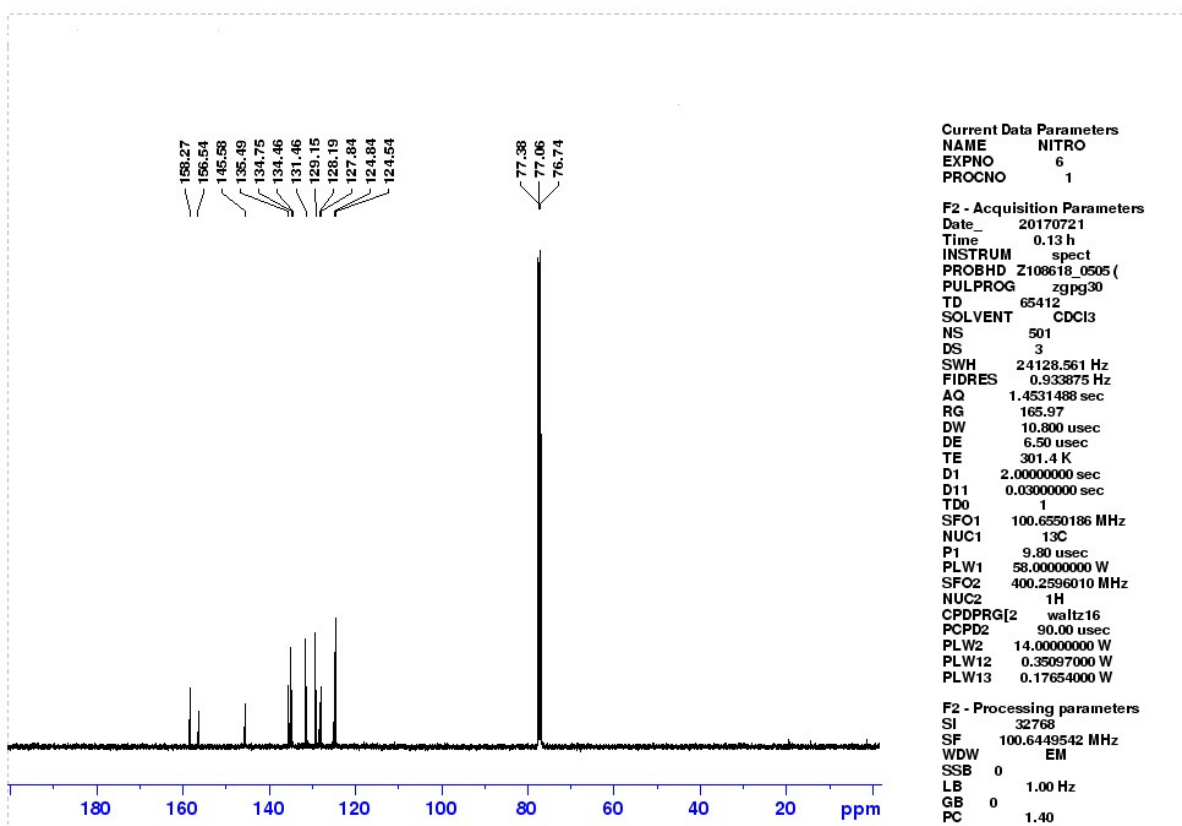

<sup>1</sup>H-NMR and <sup>13</sup>C-NMR of compound **3d** in CDCl<sub>3</sub>.

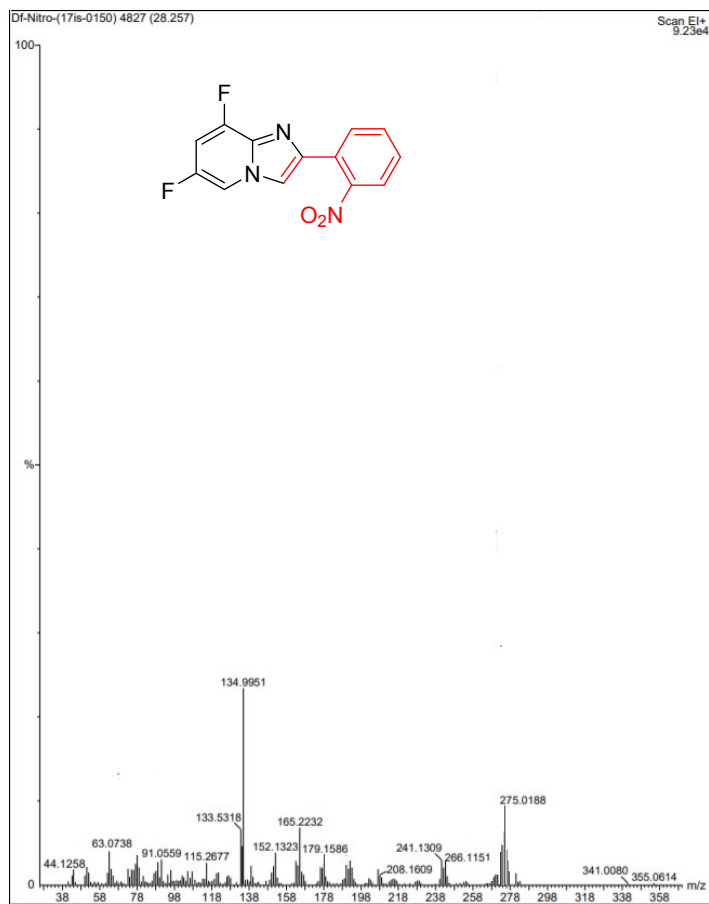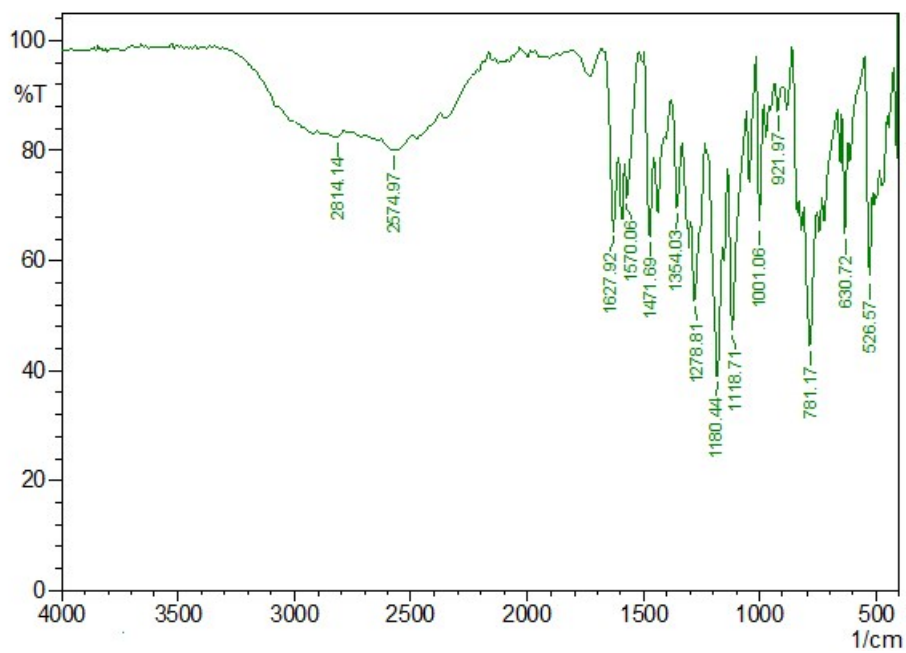

Mass and IR of Compound 3d.

Signature SIF VIT VELLORE  
NR-1116-1

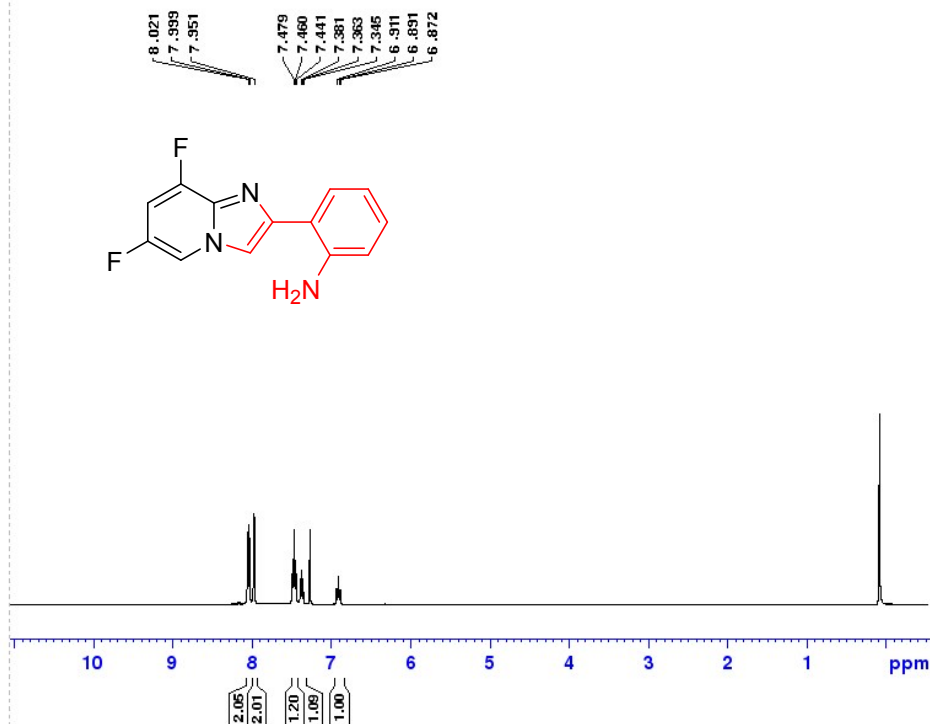

Signature SIF VIT VELLORE  
NR-717-DF-N

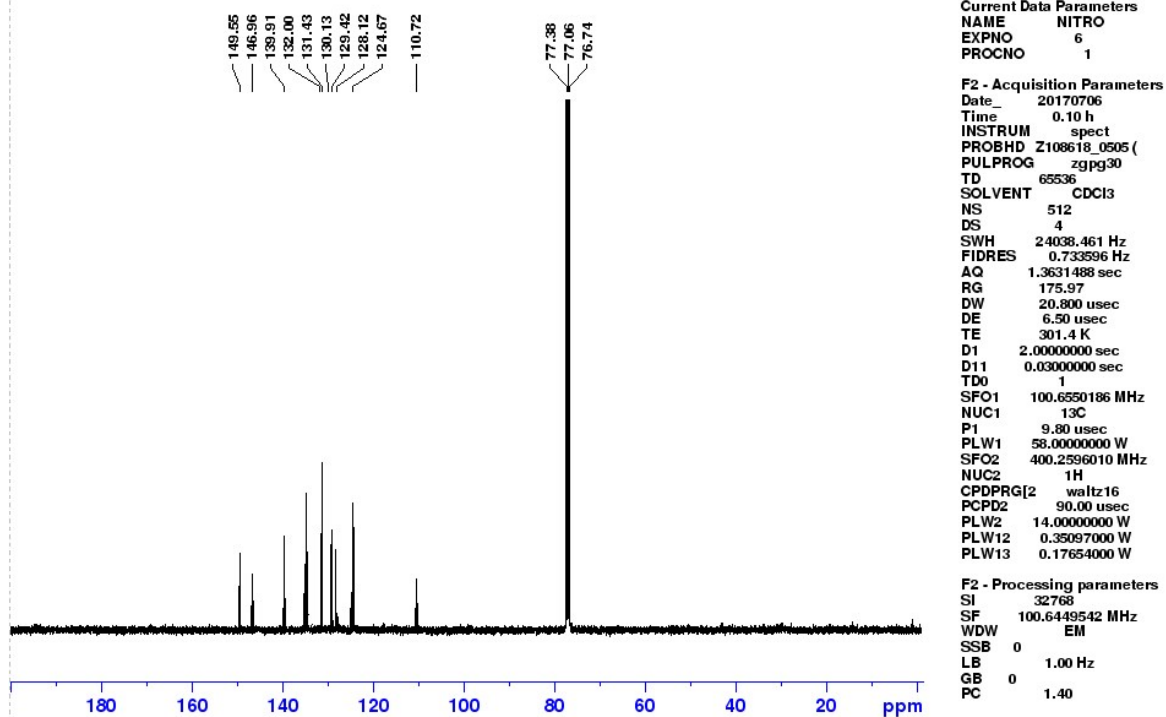

<sup>1</sup>H-NMR and <sup>13</sup>C-NMR of compound **4d** in CDCl<sub>3</sub>

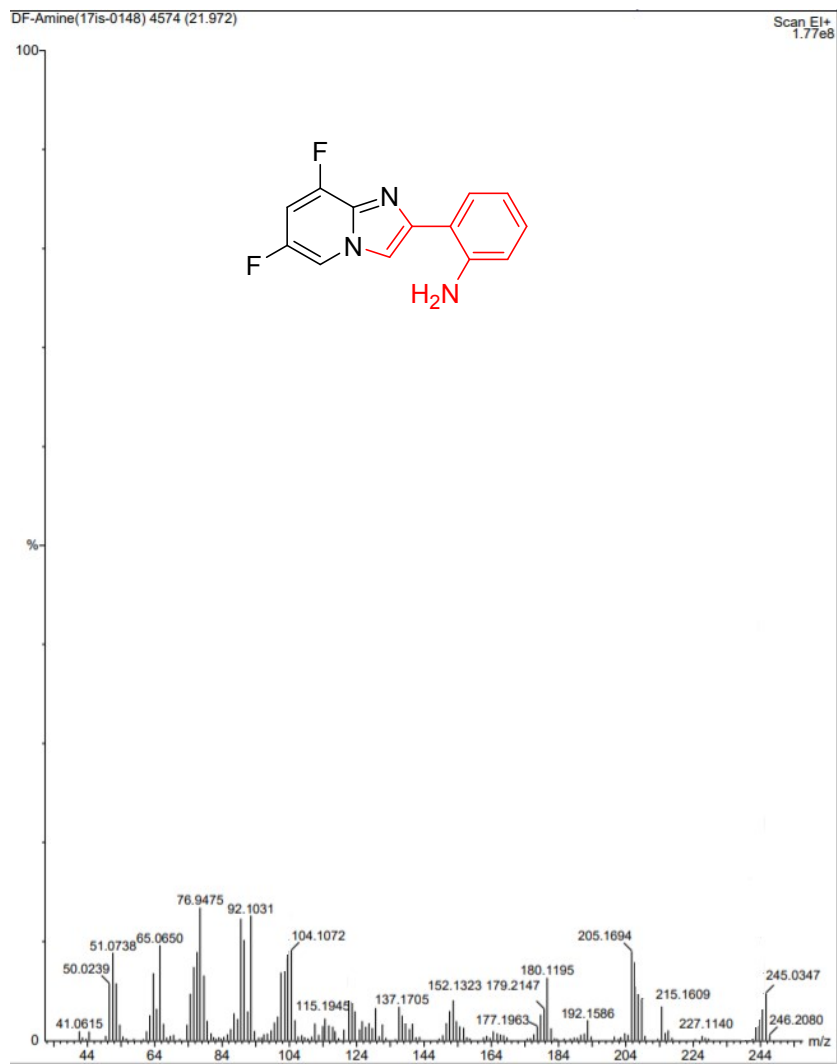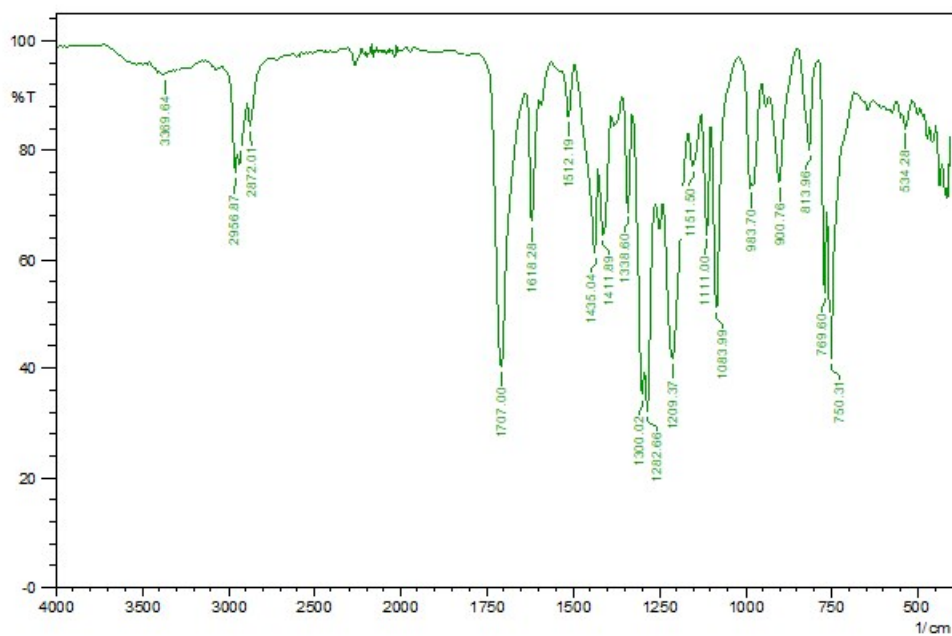

Mass and IR of Compound 4d.

Signature SIF VIT VELLORE  
NR-916-04-02

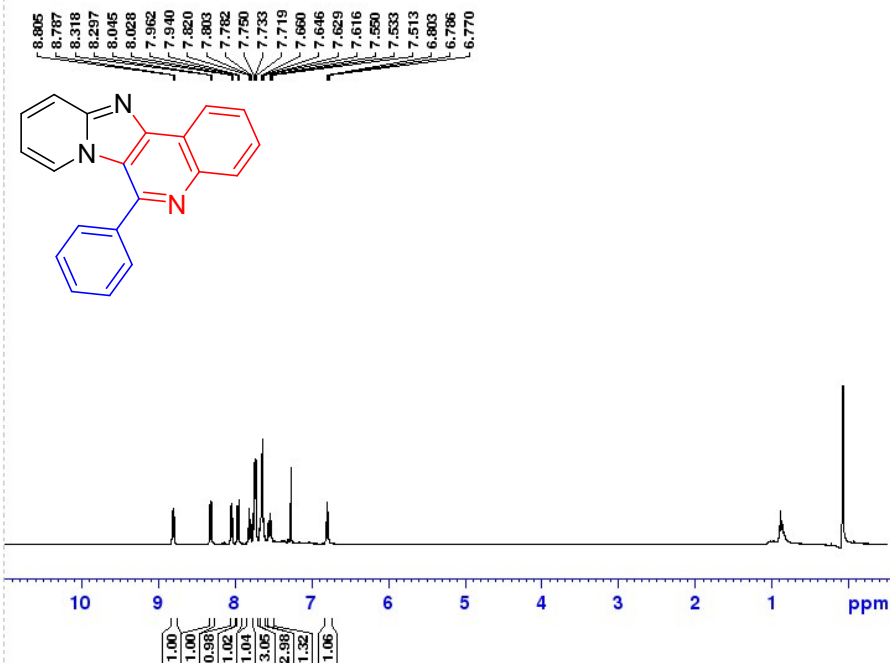

Current Data Parameters  
NAME NR-916-04-2-1H-NMR  
EXPNO 13  
PROCNO 1

F2 - Acquisition Parameters  
Date\_ 20160916  
Time 14.49  
INSTRUM spect  
PROBHD 5 mm PABBO BB/  
PULPROG zg30  
TD 65536  
SOLVENT CDCl3  
NS 16  
DS 2  
SWH 8223.685 Hz  
FIDRES 0.125483 Hz  
AQ 3.9845889 sec  
RG 143.73  
DW 60.800 usec  
DE 6.50 usec  
TE 299.8 K  
D1 1.0000000 sec  
TD0 1

===== CHANNEL f1 =====  
NUC1 1H  
P1 14.25 usec  
PLW1 14.0000000 W  
SFO1 400.2604718 MHz

F2 - Processing parameters  
SI 65536  
SF 400.2580126 MHz  
WDW EM  
SSB 0  
LB 0.30 Hz  
GB 0  
PC 1.00

Signature SIF VIT VELLORE  
NR-916-04-02

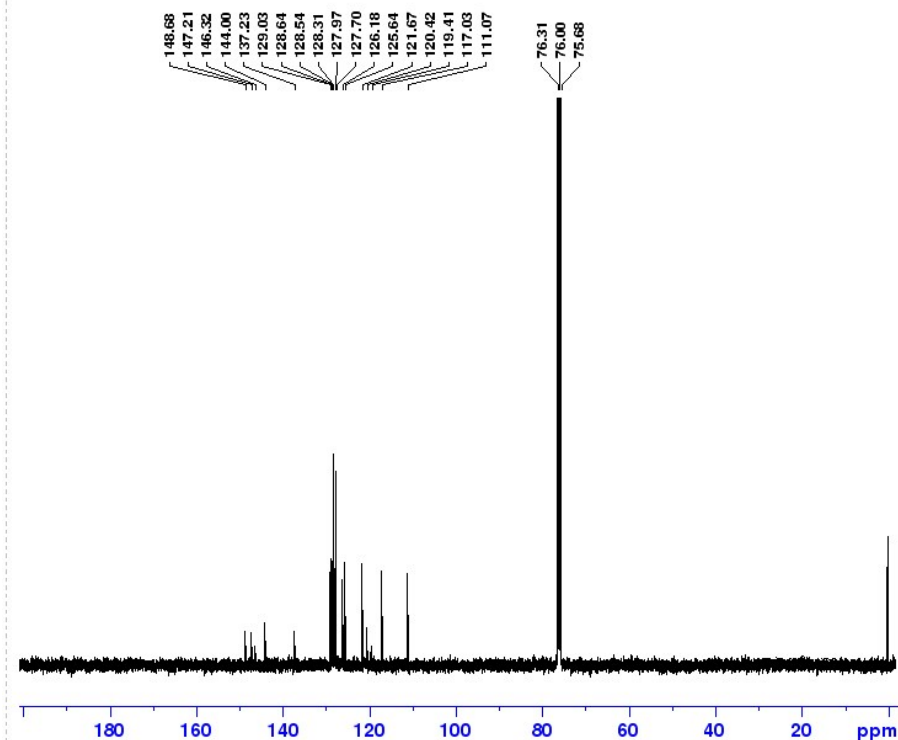

Current Data Parameters  
NAME NR-916-04-2-13C-NMR  
EXPNO 14  
PROCNO 1

F2 - Acquisition Parameters  
Date\_ 20160916  
Time 15.19  
INSTRUM spect  
PROBHD 5 mm PABBO BB/  
PULPROG zgpg30  
TD 65536  
SOLVENT CDCl3  
NS 512  
DS 4  
SWH 24038.461 Hz  
FIDRES 0.366798 Hz  
AQ 1.3631488 sec  
RG 156.91  
DW 20.800 usec  
DE 6.50 usec  
TE 300.6 K  
D1 2.0000000 sec  
D11 0.0300000 sec  
TD0 1

===== CHANNEL f1 =====  
NUC1 13C  
P1 9.80 usec  
PLW1 58.0000000 W  
SFO1 100.6550182 MHz

===== CHANNEL f2 =====  
CPDPRG2 waltz16  
NUC2 1H  
PCPD2 90.00 usec  
PLW2 14.0000000 W  
PLW12 0.35097000 W  
PLW13 0.28428999 W  
SFO2 400.2596010 MHz

F2 - Processing parameters  
SI 32768  
SF 100.6450582 MHz  
WDW EM

$^1\text{H-NMR}$  and  $^{13}\text{C-NMR}$  of compound **6a** in  $\text{CDCl}_3$ .

P:01  
Scan: 245 TIC=7348080 Base=8.3%FS Mono=2411 RT=13.2578

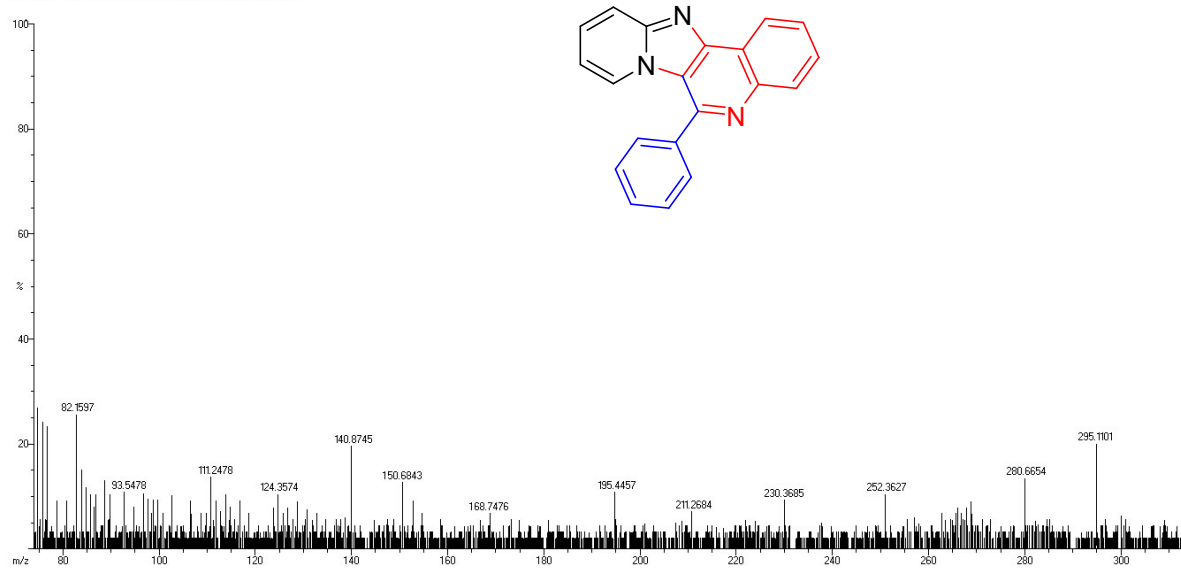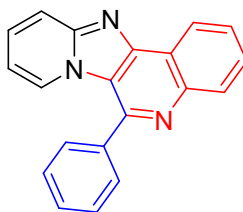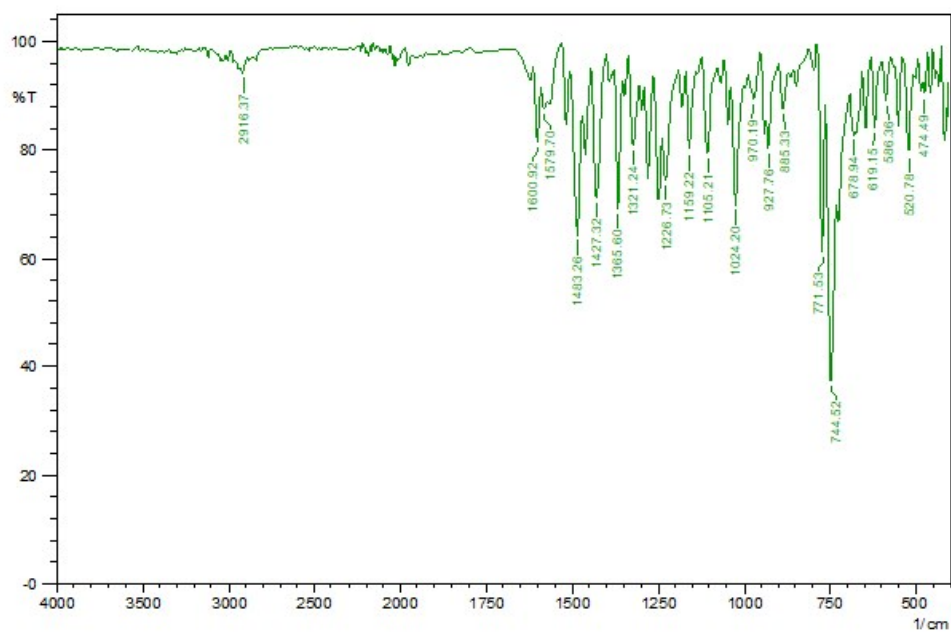

IR and HRMS of compound **6a**

Signature SIF VIT VELLORE  
NR-PCT-517-15

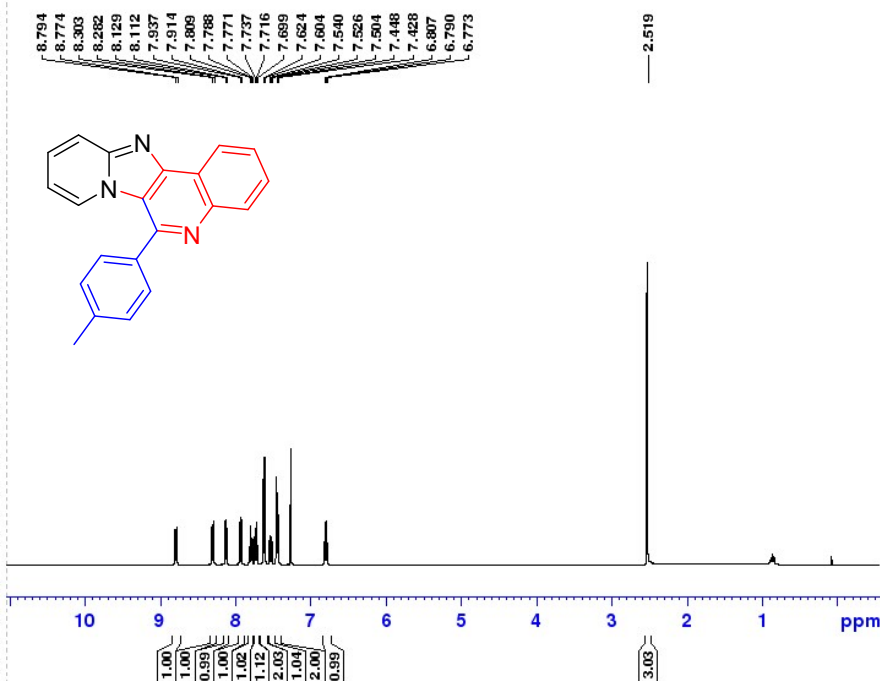

Current Data Parameters  
NAME Derivative-7-Toulaldehy  
EXPNO 3  
PROCNO 1

F2 - Acquisition Parameters  
Date\_ 20170705  
Time 22.29 h  
INSTRUM spect  
PROBHD Z108618\_0505 (  
PULPROG zg30  
TD 65536  
SOLVENT CDCl3  
NS 16  
DS 2  
SWH 8012.820 Hz  
FIDRES 0.244532 Hz  
AQ 4.0894465 sec  
RG 156.91  
DW 62.400 usec  
DE 6.50 usec  
TE 299.9 K  
D1 1.00000000 sec  
TD0 1  
SFO1 400.2604716 MHz  
NUC1 1H  
P1 14.25 usec  
PLW1 14.00000000 W

F2 - Processing parameters  
SI 65536  
SF 400.2580113 MHz  
WDW EM  
SSB 0  
LB 0.30 Hz  
GB 0  
PC 1.00

Signature SIF VIT VELLORE  
NR-PCT-517-15

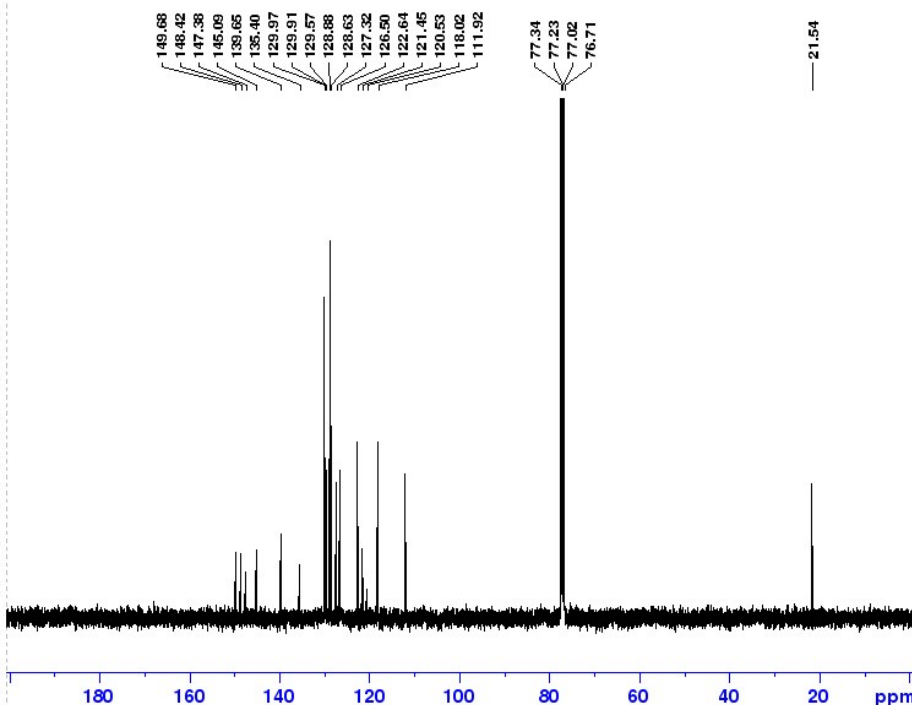

Current Data Parameters  
NAME Derivative-7-Toulaldehy  
EXPNO 4  
PROCNO 1

F2 - Acquisition Parameters  
Date\_ 20170705  
Time 23.00 h  
INSTRUM spect  
PROBHD Z108618\_0505 (  
PULPROG zgpg30  
TD 65536  
SOLVENT CDCl3  
NS 512  
DS 4  
SWH 24038.461 Hz  
FIDRES 0.733596 Hz  
AQ 1.3631488 sec  
RG 127.79  
DW 20.800 usec  
DE 6.50 usec  
TE 301.2 K  
D1 2.00000000 sec  
D11 0.03000000 sec  
TD0 1  
SFO1 100.6550186 MHz  
NUC1 13C  
P1 9.80 usec  
PLW1 58.00000000 W  
SFO2 400.2596010 MHz  
NUC2 1H  
CPDPRG2 waltz16  
PCPD2 90.00 usec  
PLW2 14.00000000 W  
PLW12 0.35097000 W  
PLW13 0.17654000 W

F2 - Processing parameters  
SI 32768  
SF 100.6449542 MHz  
WDW EM  
SSB 0  
LB 1.00 Hz  
GB 0  
PC 1.40

$^1\text{H}$ -NMR and  $^{13}\text{C}$ -NMR of compound **6b** in  $\text{CDCl}_3$

15  
Scan 2252 TIC=7349080 Base=8.3%FS Hconc=2417 RT=12.72

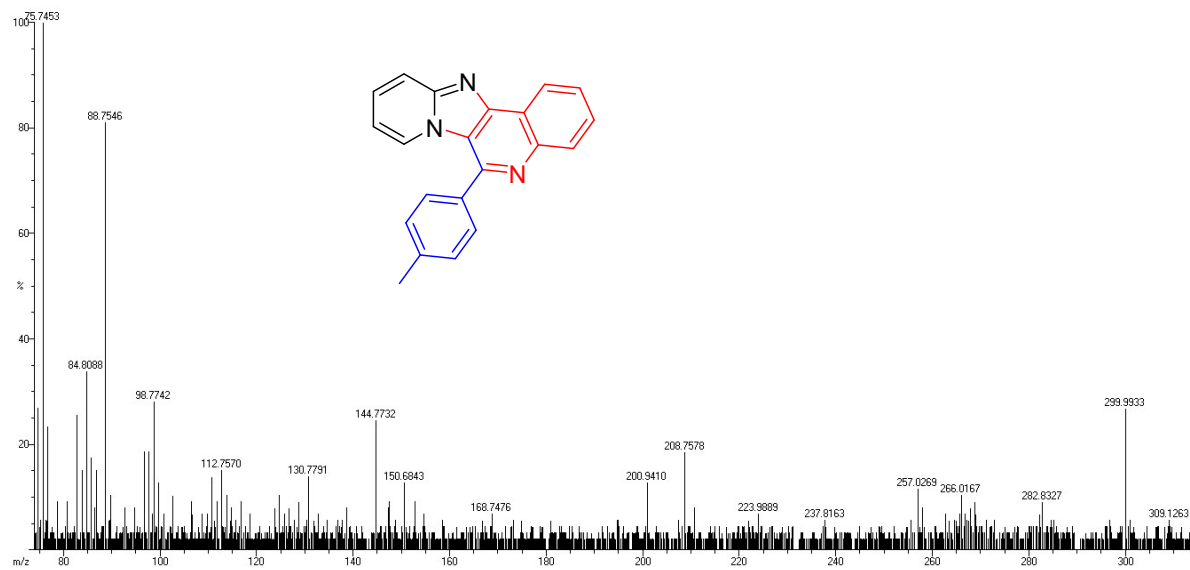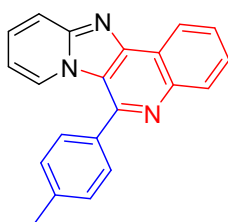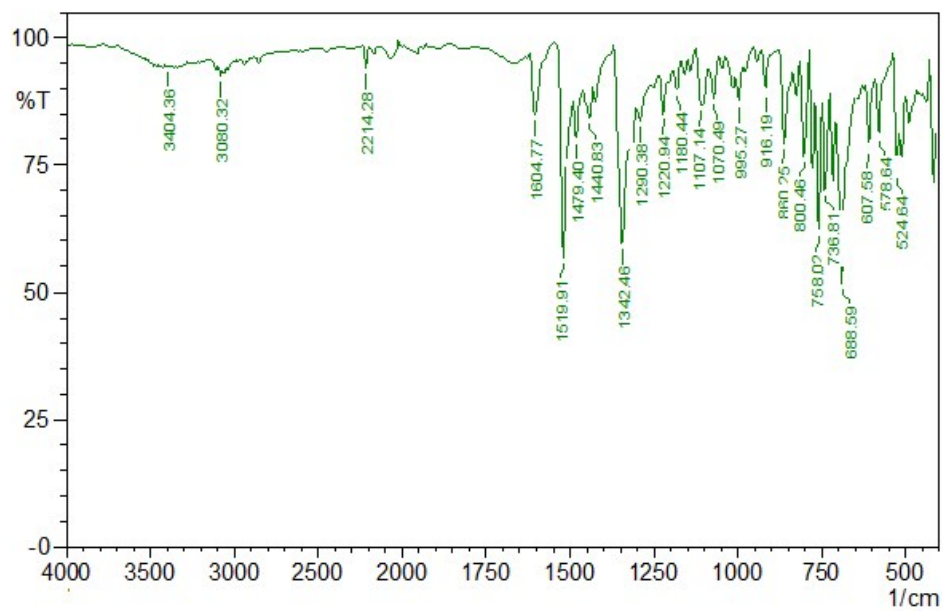

IR and HRMS of compound **6b**



Signature SIF VIT VELLORE  
NR-916-4

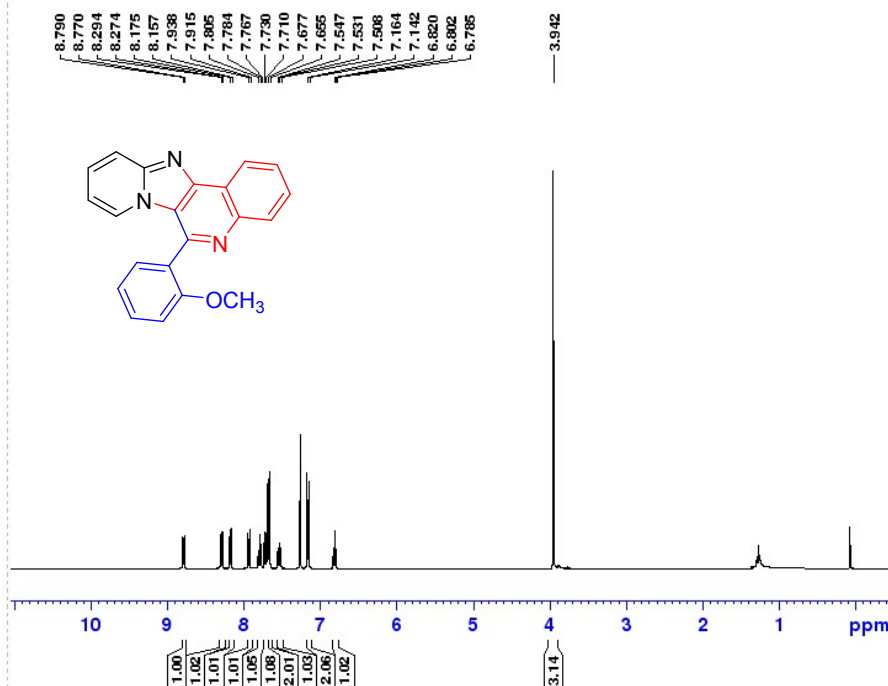

Signature SIF VIT VELLORE  
NR-916-4

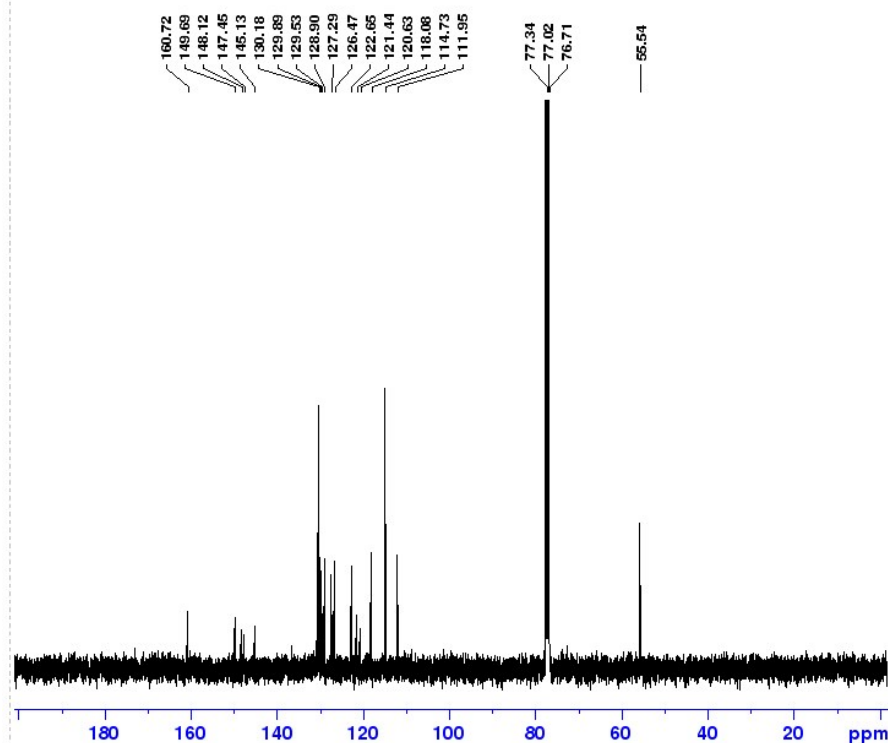

$^1\text{H-NMR}$  and  $^{13}\text{C-NMR}$  of compound **6c** in  $\text{CDCl}_3$ .

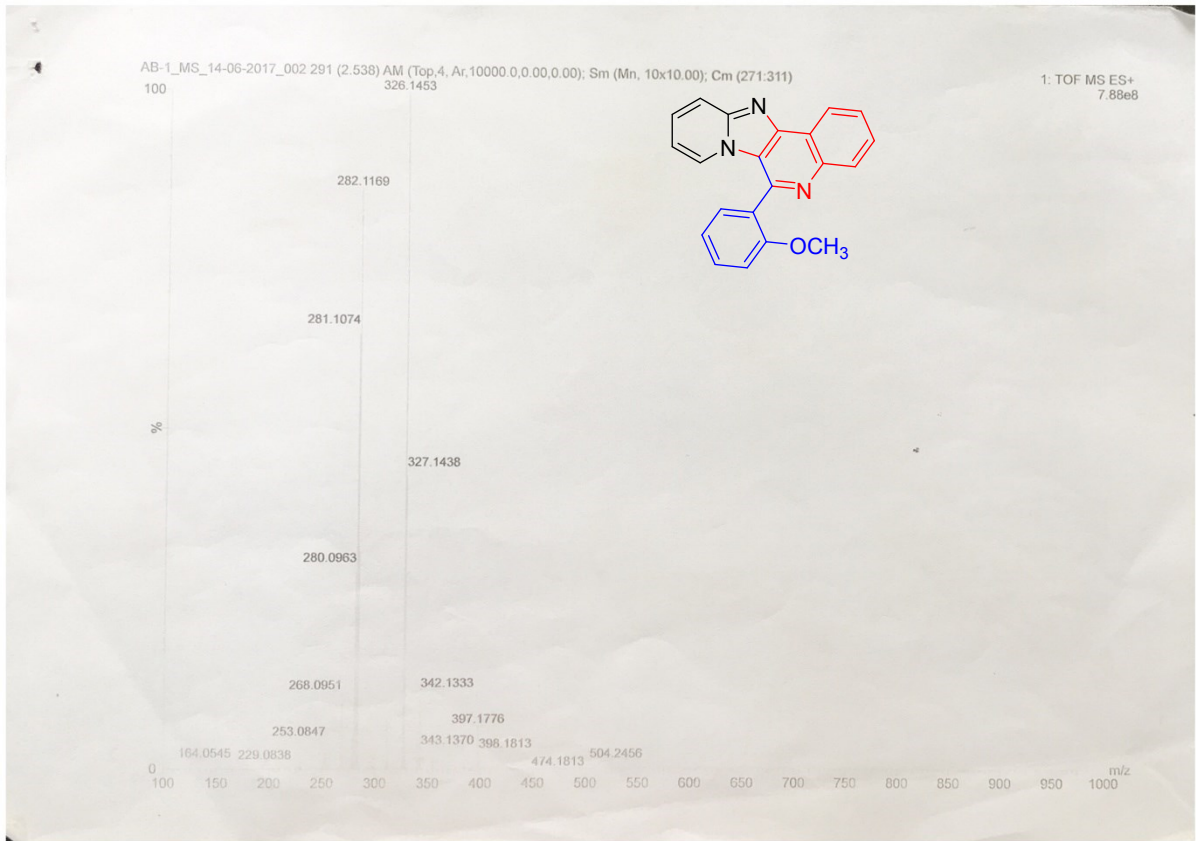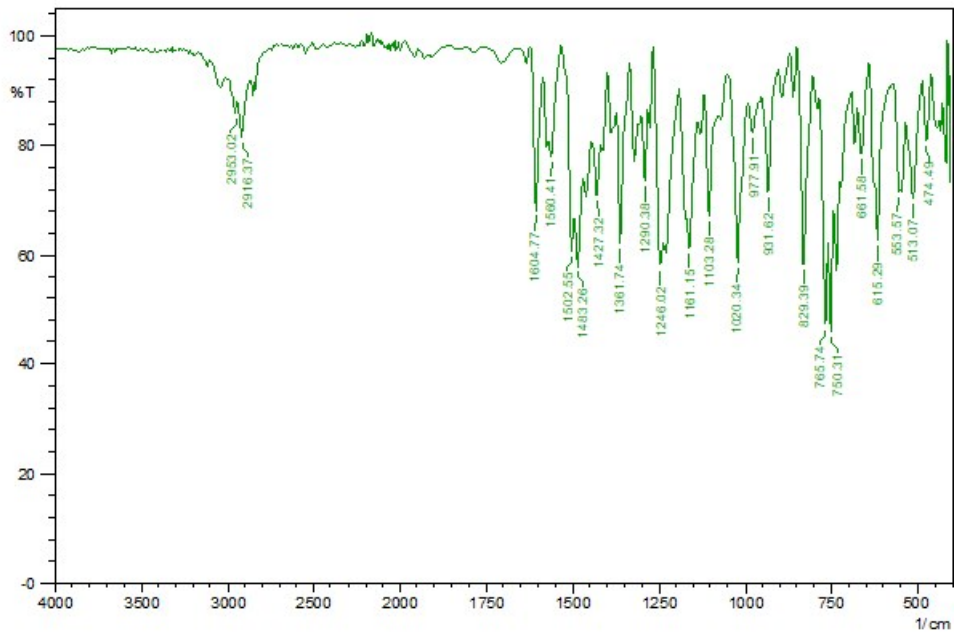

IR and HRMS of compound **6c**

Signature SIF VIT VELLORE  
NR-1016-7

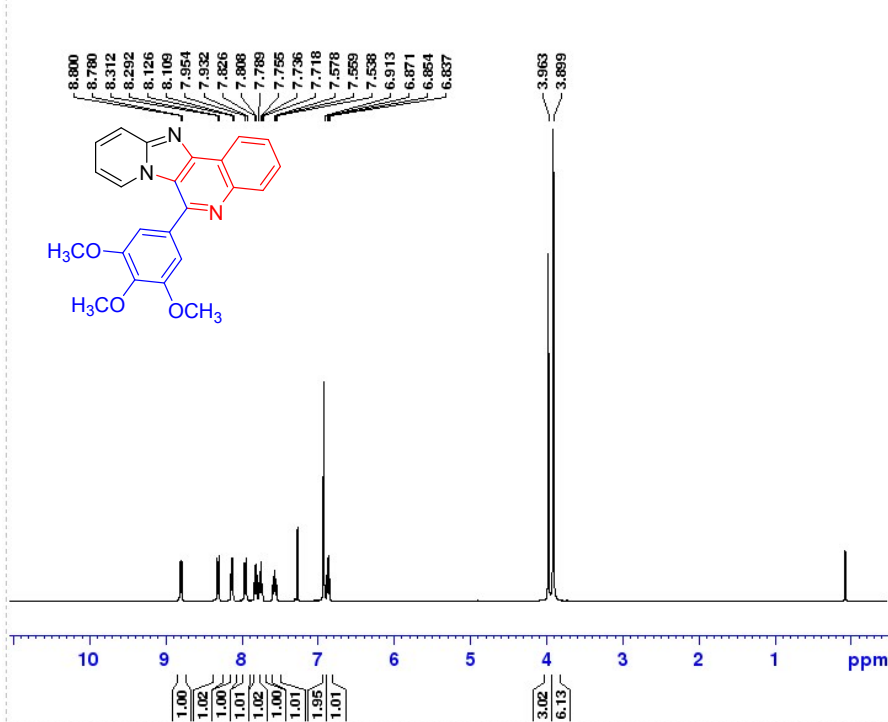

Signature SIF VIT VELLORE  
NR-1016-7

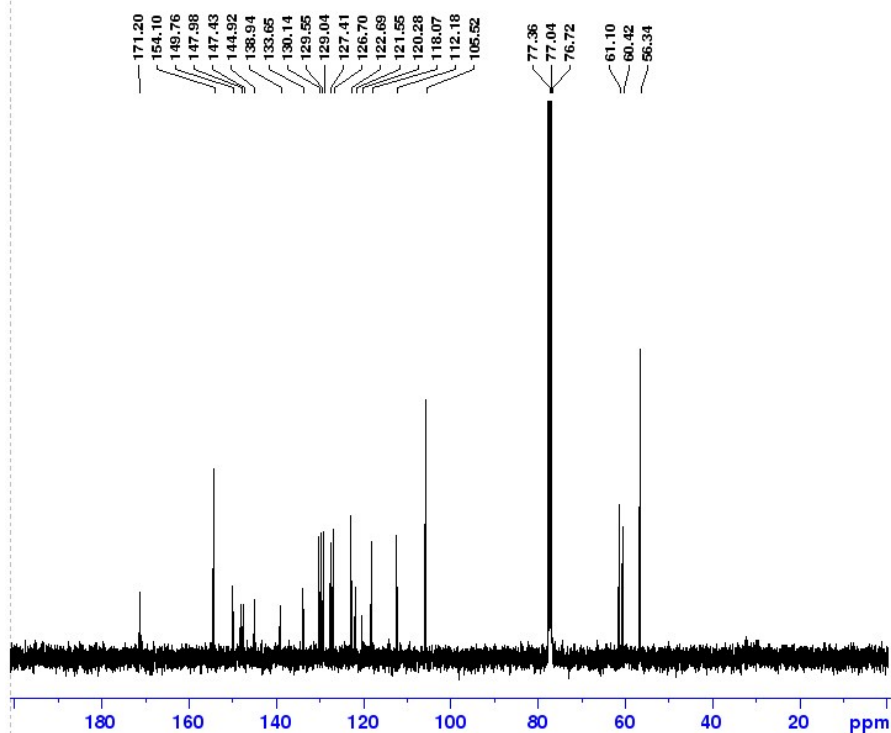

$^1\text{H-NMR}$  and  $^{13}\text{C-NMR}$  of compound **6d** in  $\text{CDCl}_3$

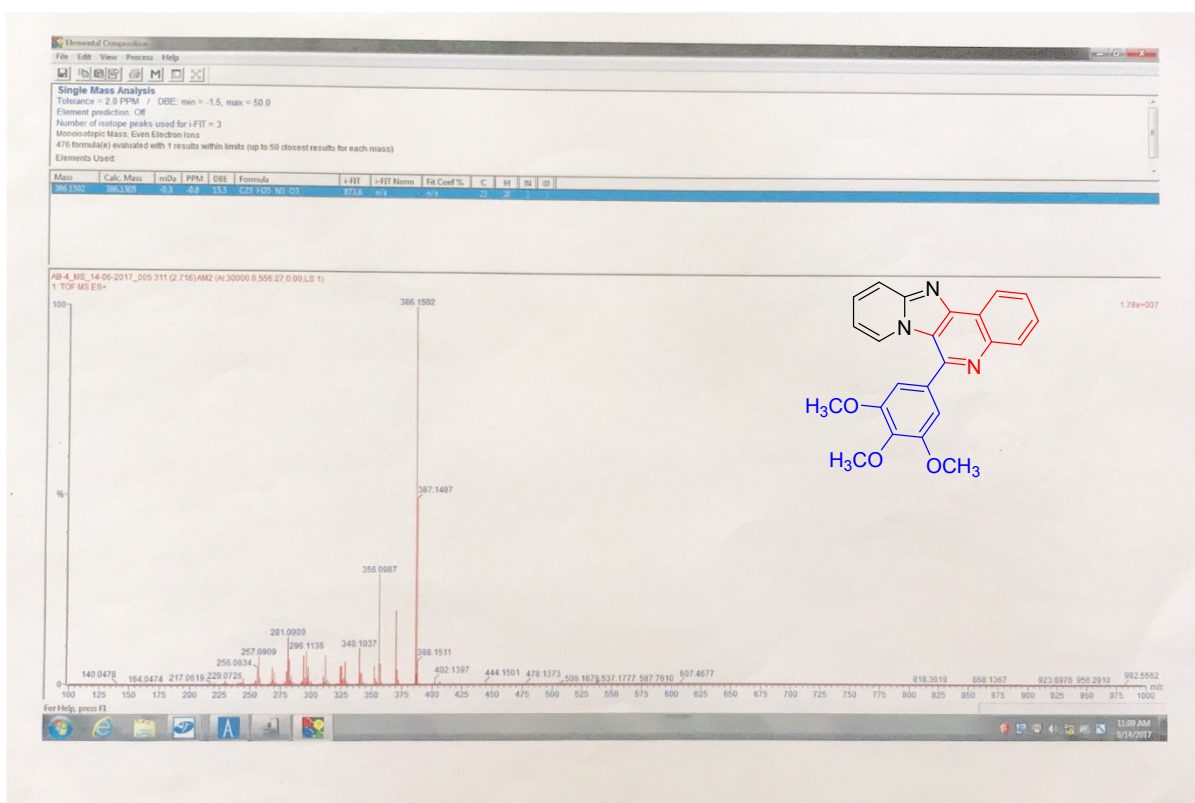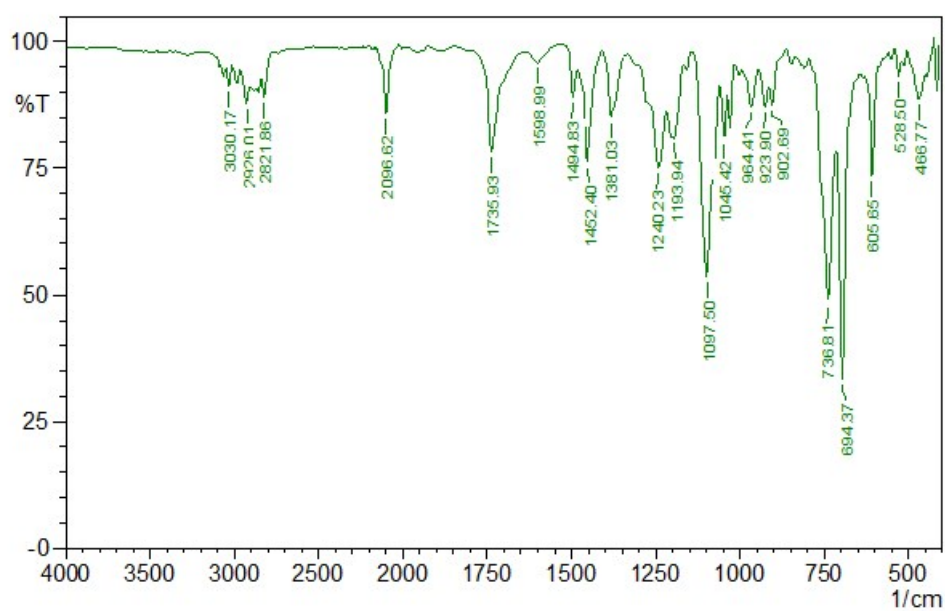

IR and HRMS of compound **6d**

Signature SIF VIT VELLORE  
NR-916-5-2

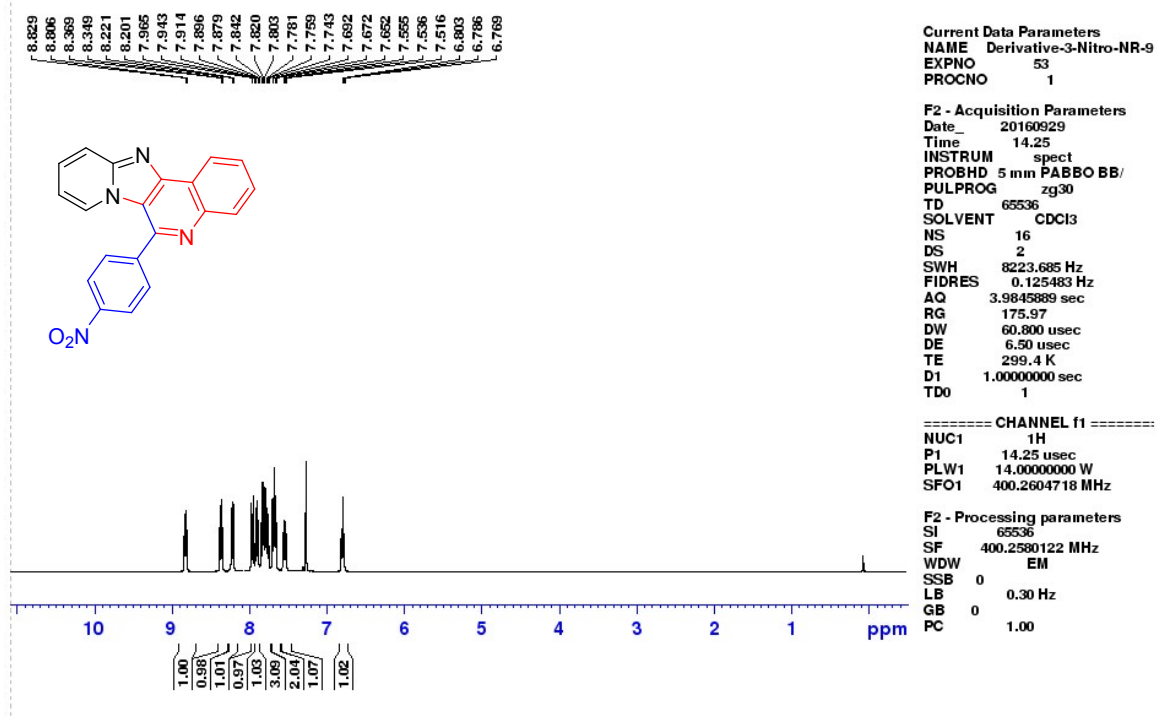

Signature SIF VIT VELLORE  
NR-916-5-2

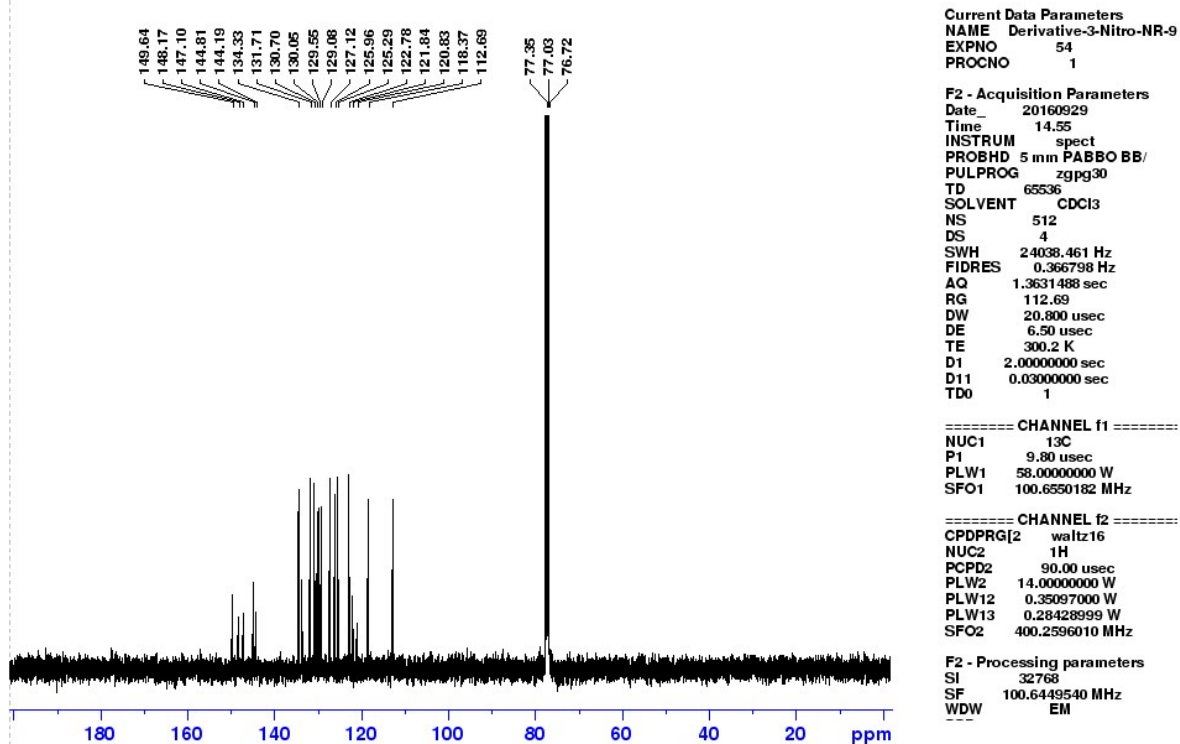

$^1\text{H-NMR}$  and  $^{13}\text{C-NMR}$  of compound **6e** in  $\text{CDCl}_3$

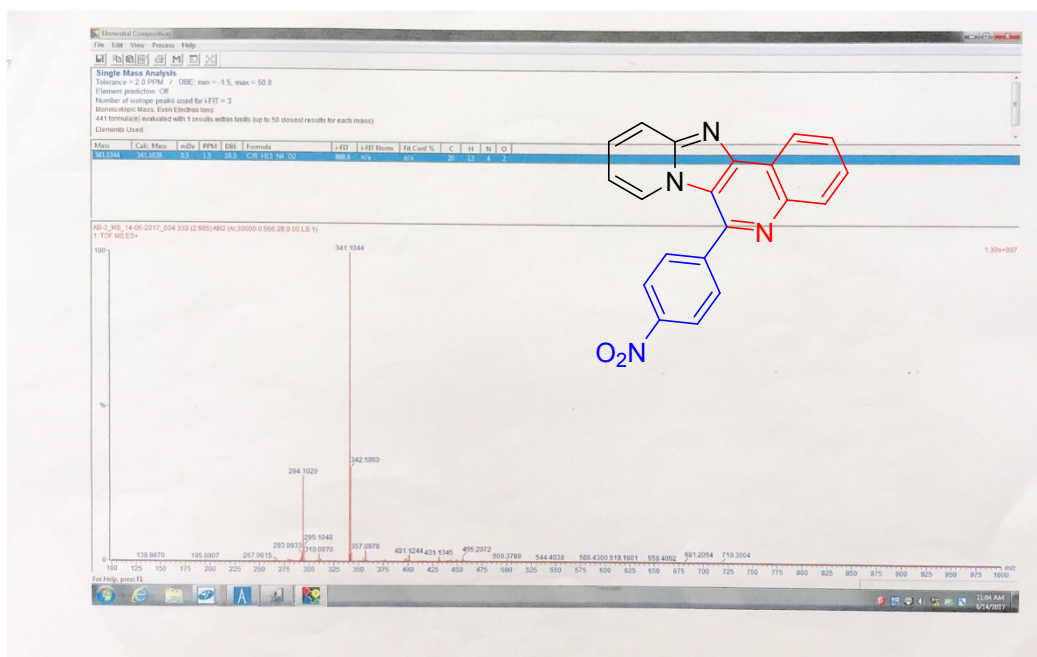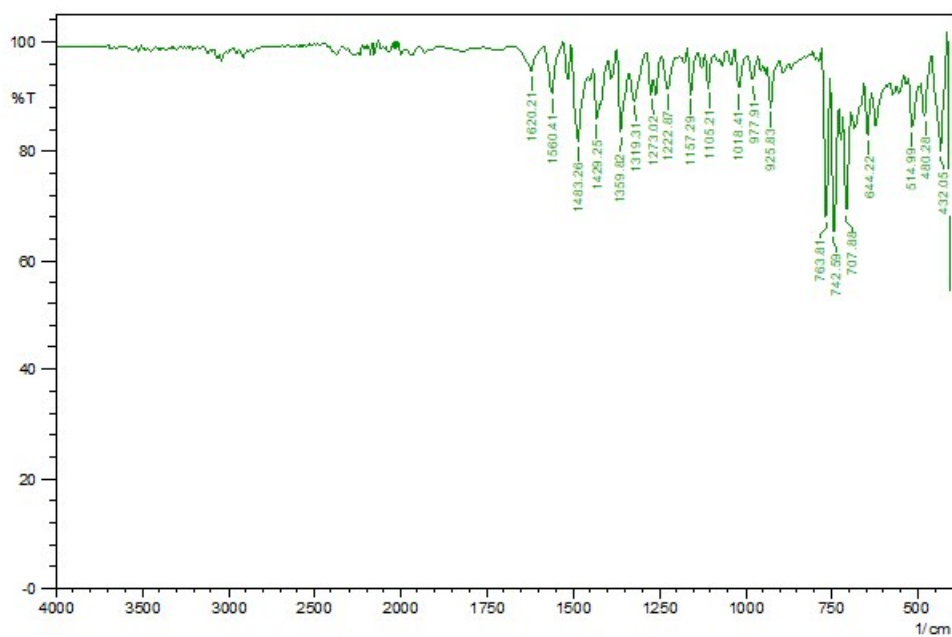

IR and HRMS of compound **6e**

Signature SIF VIT VELLORE  
NR-1016-10

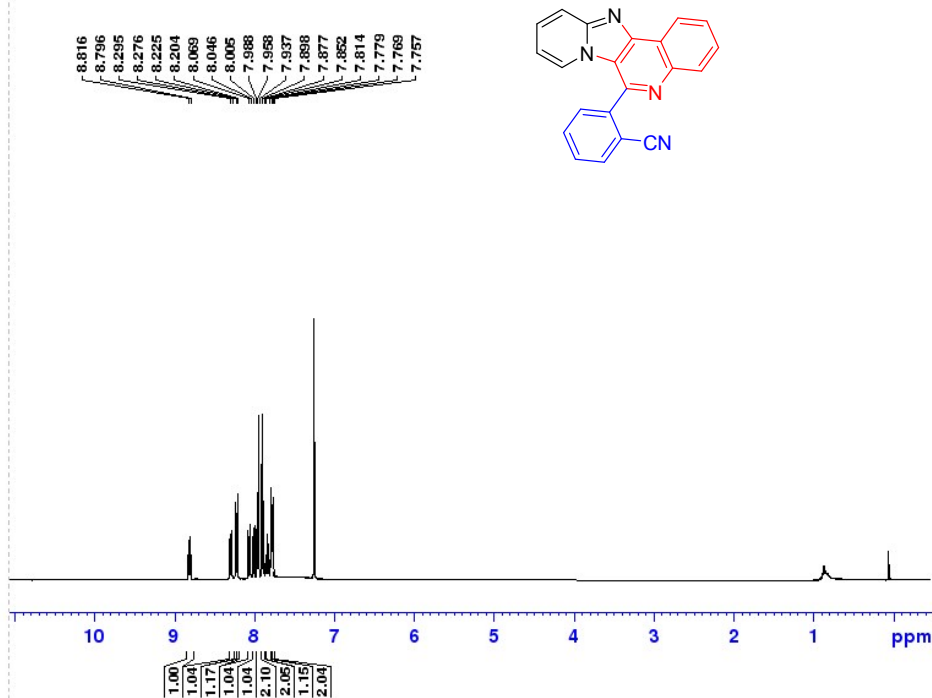

Current Data Parameters  
NAME Derivative-6-Cyano-NR-  
EXPNO 20  
PROCNO 1

F2 - Acquisition Parameters  
Date\_ 20161026  
Time 16.04 h  
INSTRUM spect  
PROBHD Z108618\_0505 (  
PULPROG zg30  
TD 65536  
SOLVENT CDCl3  
NS 16  
DS 2  
SWH 8012.820 Hz  
FIDRES 0.244532 Hz  
AQ 4.0894465 sec  
RG 199.6  
DW 62.400 usec  
DE 6.50 usec  
TE 299.0 K  
D1 1.00000000 sec  
TD0 1  
SFO1 400.2604716 MHz  
NUC1 1H  
P1 14.25 usec  
PLW1 14.00000000 W

F2 - Processing parameters  
SI 65536  
SF 400.2580157 MHz  
WDW EM  
SSB 0  
LB 0.30 Hz  
GB 0  
PC 1.00

Signature SIF VIT VELLORE  
NR-1016-10

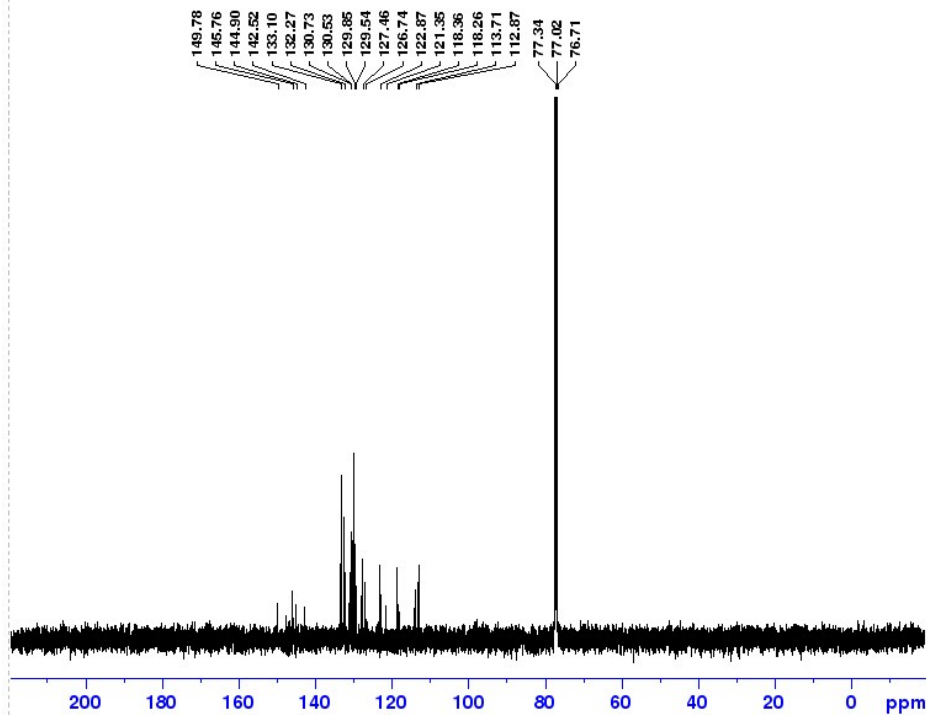

Current Data Parameters  
NAME Derivative-6-Cyano-NR-  
EXPNO 21  
PROCNO 1

F2 - Acquisition Parameters  
Date\_ 20161026  
Time 16.34 h  
INSTRUM spect  
PROBHD Z108618\_0505 (  
PULPROG zgpg30  
TD 65536  
SOLVENT CDCl3  
NS 512  
DS 4  
SWH 24038.461 Hz  
FIDRES 0.733596 Hz  
AQ 1.3631488 sec  
RG 156.91  
DW 20.800 usec  
DE 6.50 usec  
TE 299.7 K  
D1 2.00000000 sec  
D11 0.03000000 sec  
TD0 1  
SFO1 100.6550186 MHz  
NUC1 13C  
P1 9.80 usec  
PLW1 58.00000000 W  
SFO2 400.2596010 MHz  
NUC2 1H  
CPDPRG[2] waltz16  
PCPD2 90.00 usec  
PLW2 14.00000000 W  
PLW12 0.35097000 W  
PLW13 0.17654000 W

F2 - Processing parameters  
SI 32768  
SF 100.6449542 MHz  
WDW EM  
SSB 0  
LB 1.00 Hz  
GB 0  
PC 1.40

<sup>1</sup>H-NMR and <sup>13</sup>C-NMR of compound **6f** in CDCl<sub>3</sub>

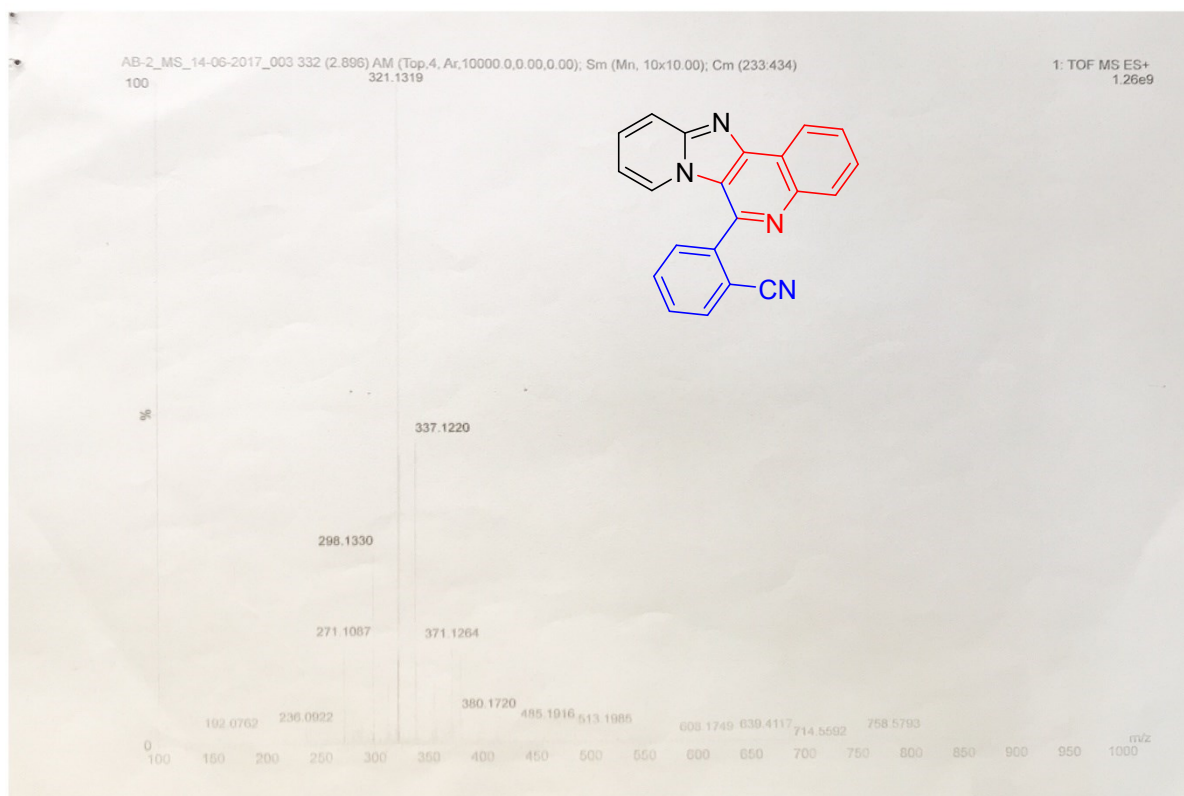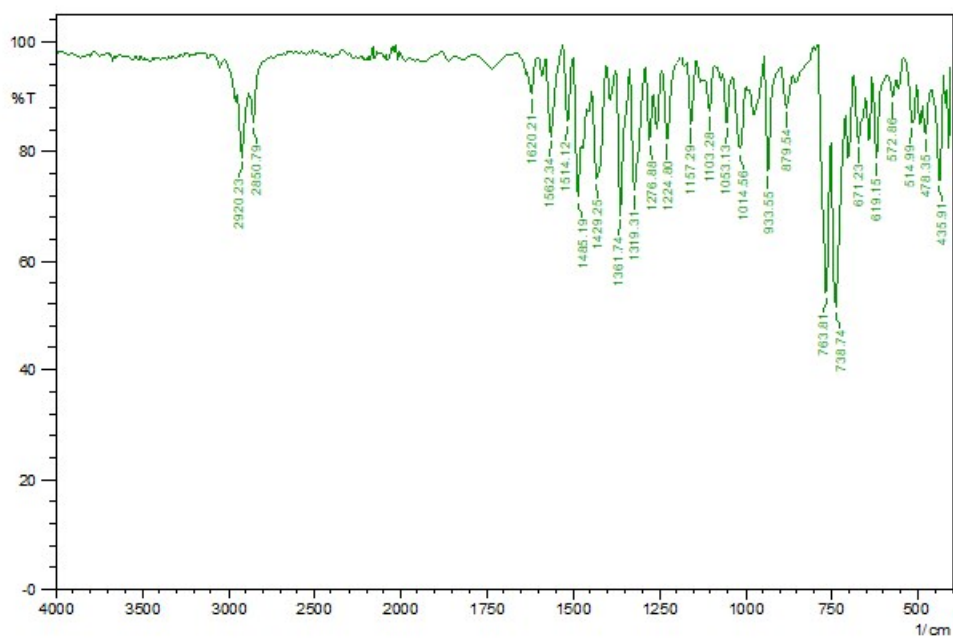

IR and HRMS of compound **6f**



Signature SIF VIT VELLORE  
NR-1016-8

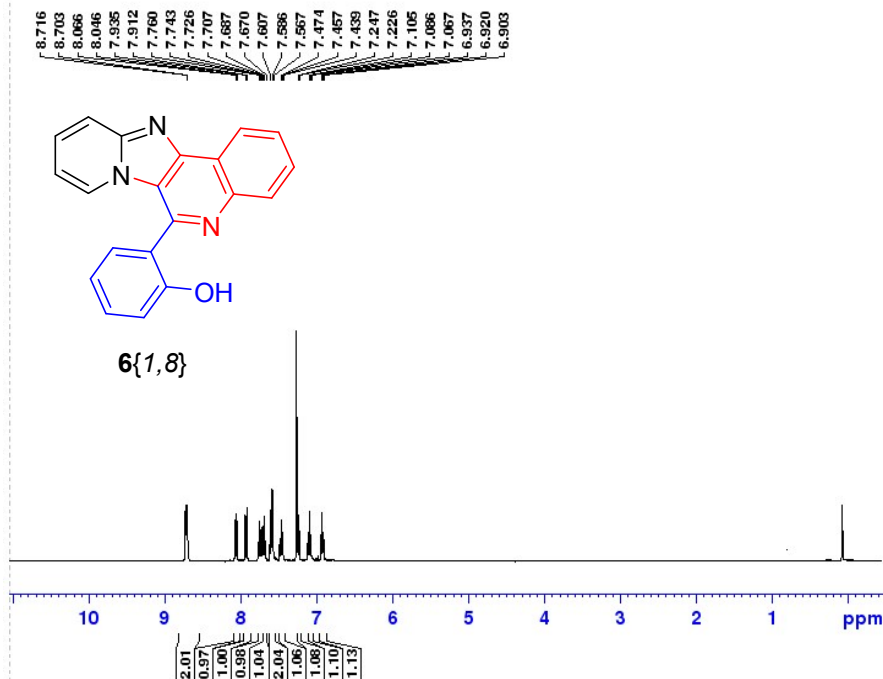

Current Data Parameters  
NAME Derivative-5 salicaldeh  
EXPNO 18  
PROCNO 1

F2 - Acquisition Parameters  
Date\_ 20161024  
Time 21.20 h  
INSTRUM spect  
PROBHD Z108618\_0505 (  
PULPROG zg30  
TD 65536  
SOLVENT CDCl3  
NS 16  
DS 2  
SWH 8012.820 Hz  
FIDRES 0.244532 Hz  
AQ 4.0894465 sec  
RG 199.6  
DW 62.400 usec  
DE 6.50 usec  
TE 299.7 K  
D1 1.00000000 sec  
TD0 1  
SFO1 400.2604716 MHz  
NUC1 1H  
P1 14.25 usec  
PLW1 14.0000000 W

F2 - Processing parameters  
SI 65536  
SF 400.2580100 MHz  
WDW EM  
SSB 0  
LB 0.30 Hz  
GB 0  
PC 1.00

Signature SIF VIT VELLORE  
NR-1016-8

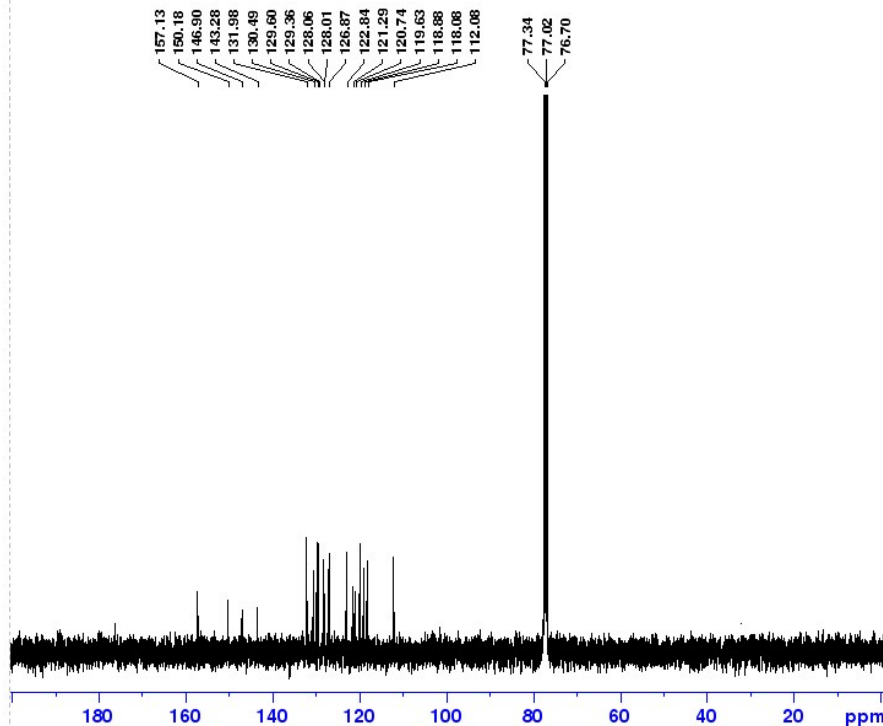

Current Data Parameters  
NAME Derivative-5 salicaldeh  
EXPNO 19  
PROCNO 1

F2 - Acquisition Parameters  
Date\_ 20161024  
Time 21.49 h  
INSTRUM spect  
PROBHD Z108618\_0505 (  
PULPROG zgpg30  
TD 65536  
SOLVENT CDCl3  
NS 512  
DS 4  
SWH 24038.461 Hz  
FIDRES 0.733596 Hz  
AQ 1.3631488 sec  
RG 143.73  
DW 20.800 usec  
DE 6.50 usec  
TE 300.4 K  
D1 2.00000000 sec  
D11 0.03000000 sec  
TD0 1  
SFO1 100.6250186 MHz  
NUC1 13C  
P1 9.80 usec  
PLW1 58.0000000 W  
SFO2 400.2596010 MHz  
NUC2 1H  
CPDPRG2 waltz16  
PCPD2 90.00 usec  
PLW2 14.0000000 W  
PLW12 0.35097000 W  
PLW13 0.17654000 W

F2 - Processing parameters  
SI 32768  
SF 100.6449542 MHz  
WDW EM  
SSB 0  
LB 1.00 Hz  
GB 0  
PC 1.40

<sup>1</sup>H-NMR and <sup>13</sup>C-NMR of compound **6g** in CDCl<sub>3</sub>

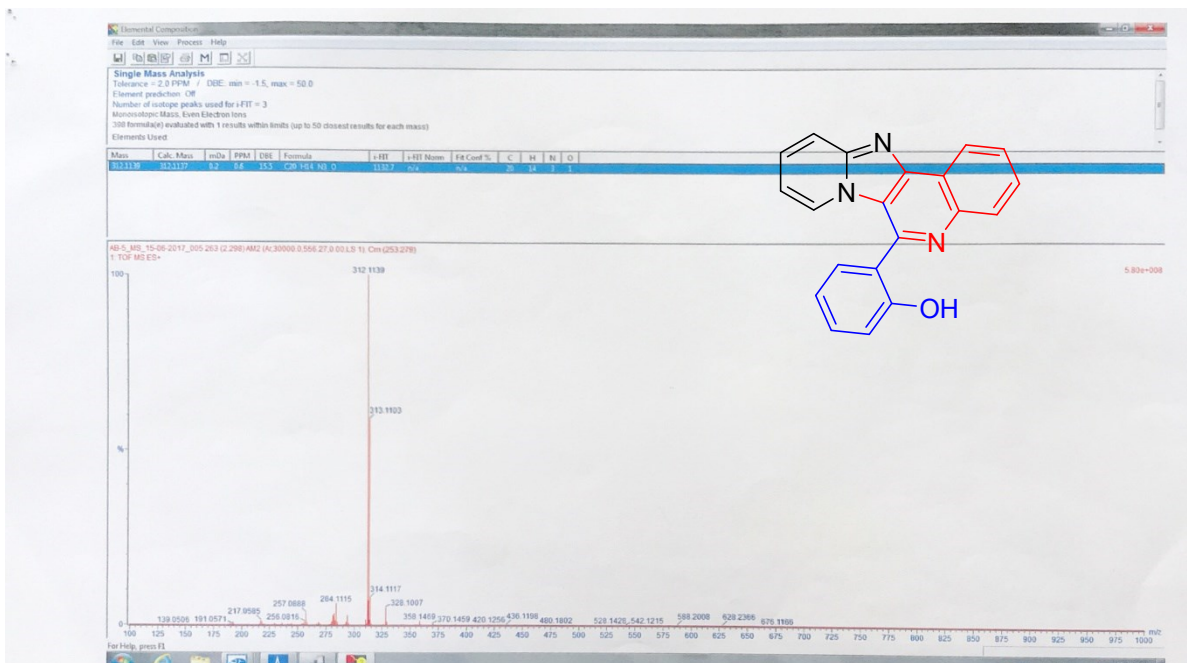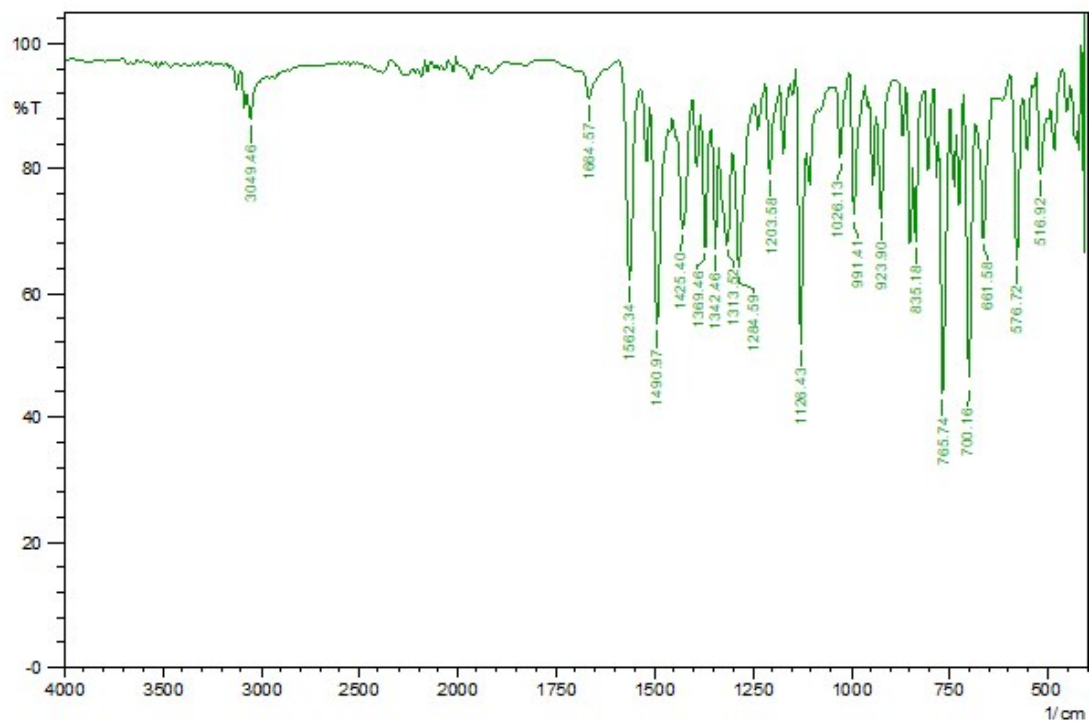

IR and HRMS of compound **6g**

Signature SIF VIT VELLORE  
NR-417-PCT-3

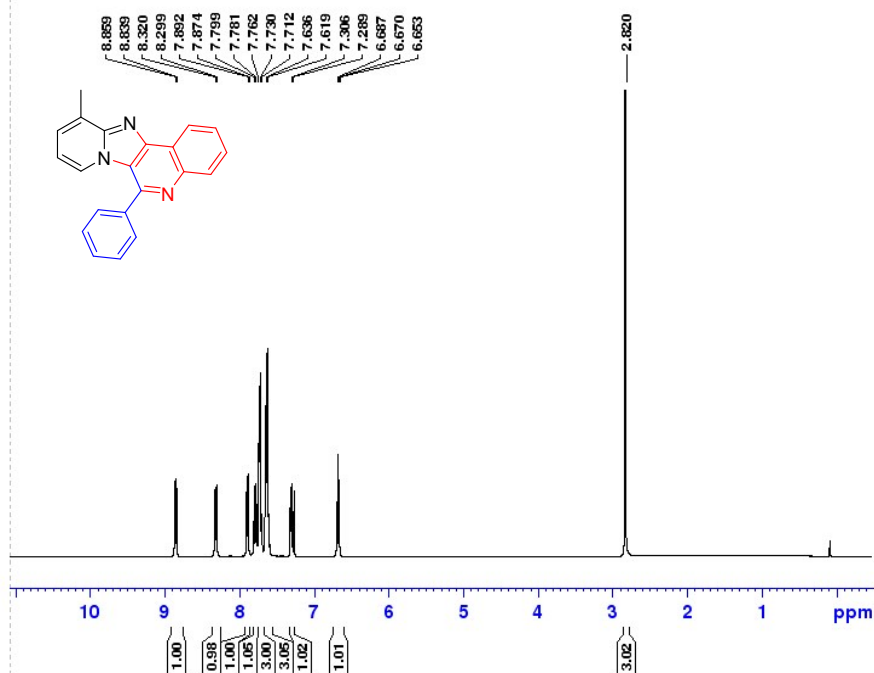

Current Data Parameters  
NAME Derivative-1-benzaldeh  
EXPNO 30  
PROCNO 1

F2 - Acquisition Parameters  
Date\_ 20170403  
Time 11.00 h  
INSTRUM spect  
PROBHD Z108618\_0505 (  
PULPROG zg30  
TD 65536  
SOLVENT CDCl3  
NS 16  
DS 2  
SWH 8012.820 Hz  
FIDRES 0.244532 Hz  
AQ 4.0894465 sec  
RG 143.73  
DW 62.400 usec  
DE 6.50 usec  
TE 298.5 K  
D1 1.0000000 sec  
TD0 1  
SFO1 400.2604716 MHz  
NUC1 1H  
P1 14.25 usec  
PLW1 14.0000000 W

F2 - Processing parameters  
SI 65536  
SF 400.2580099 MHz  
WDW EM  
SSB 0  
LB 0.30 Hz  
GB 0  
PC 1.00

Signature SIF VIT VELLORE  
NR-417-PCT-3

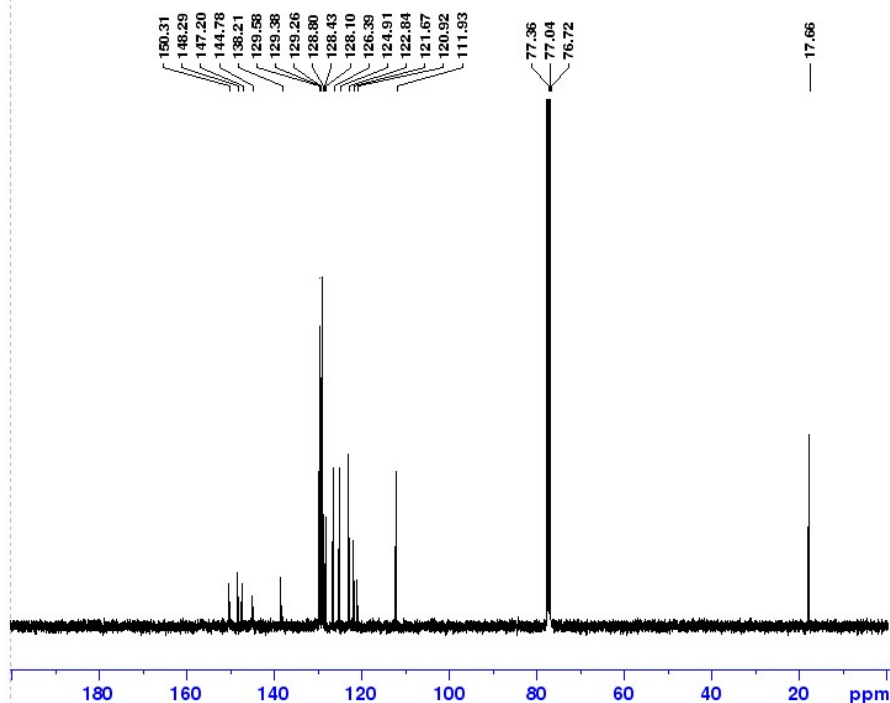

Current Data Parameters  
NAME Derivative-1-benzaldeh  
EXPNO 31  
PROCNO 1

F2 - Acquisition Parameters  
Date\_ 20170403  
Time 11.31 h  
INSTRUM spect  
PROBHD Z108618\_0505 (  
PULPROG zgpg30  
TD 65536  
SOLVENT CDCl3  
NS 512  
DS 4  
SWH 24038.461 Hz  
FIDRES 0.733596 Hz  
AQ 1.3631488 sec  
RG 88.69  
DW 20.800 usec  
DE 6.50 usec  
TE 299.4 K  
D1 2.0000000 sec  
D11 0.0300000 sec  
TD0 1  
SFO1 100.6550186 MHz  
NUC1 13C  
P1 9.80 usec  
PLW1 58.0000000 W  
SFO2 400.2596010 MHz  
NUC2 1H  
CPDPRG2 waltz16  
PCPD2 90.00 usec  
PLW2 14.0000000 W  
PLW12 0.35097000 W  
PLW13 0.17654000 W

F2 - Processing parameters  
SI 32768  
SF 100.6449542 MHz  
WDW EM  
SSB 0  
LB 1.00 Hz  
GB 0  
PC 1.40

$^1\text{H-NMR}$  and  $^{13}\text{C-NMR}$  of compound **6h** in  $\text{CDCl}_3$ .

P-17  
Scan: 2602 TIC=7291312 Base=4.5%FS #Ions=2526 RT=14.54

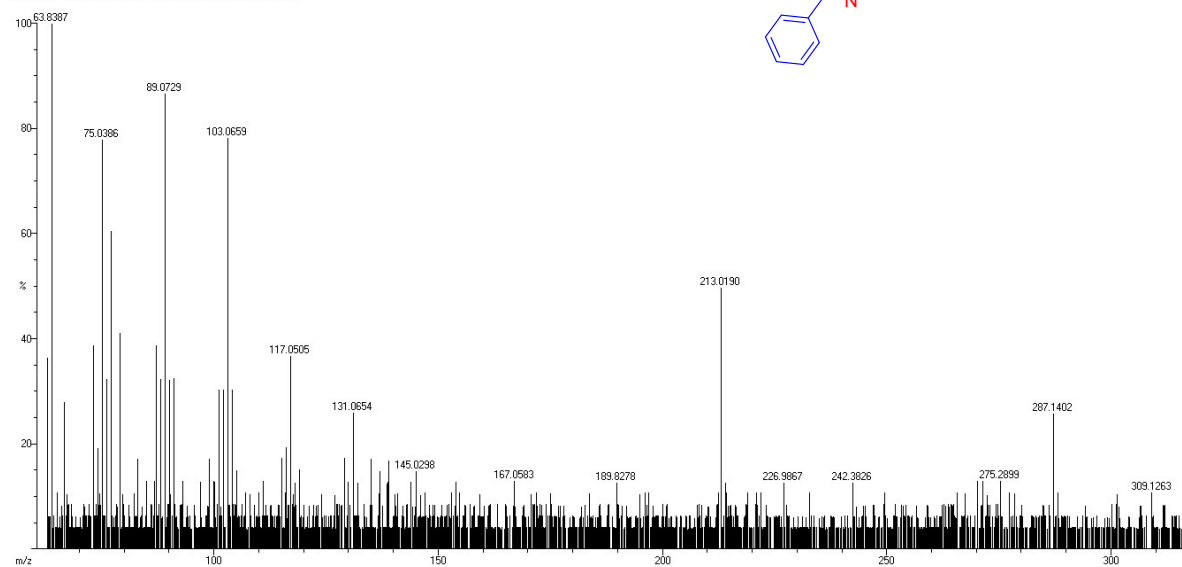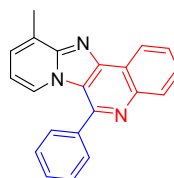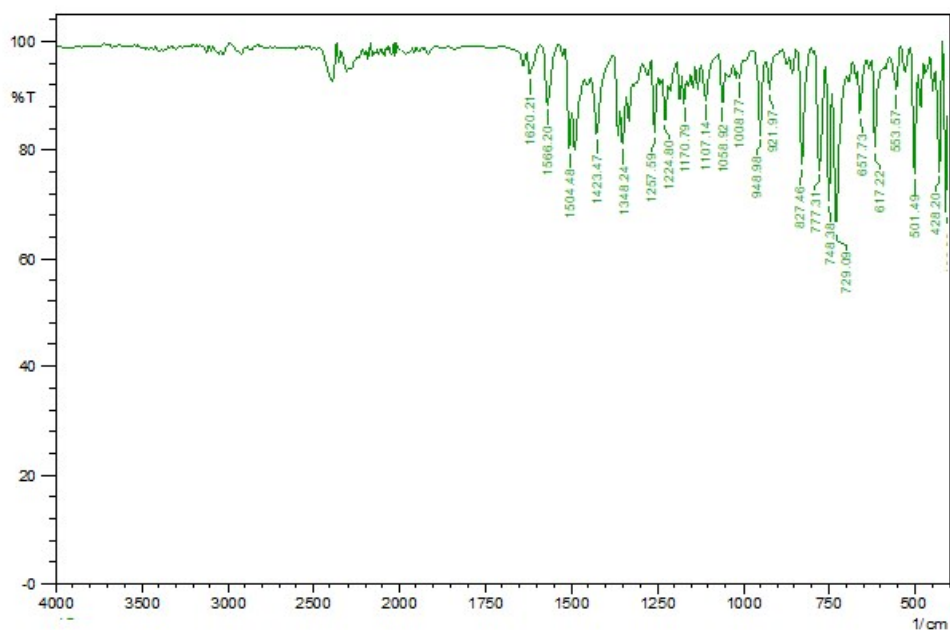

HRMS and IR of compound **6h**.

Signature SIF VIT VELLORE  
NR-417-PCT-6

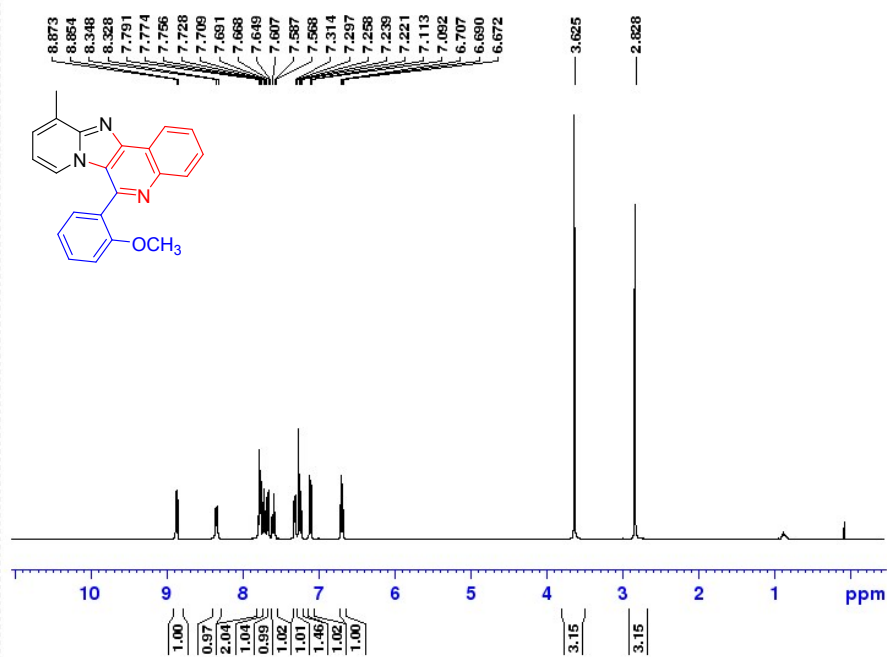

Current Data Parameters  
NAME Derivative-4-2-Methoxy  
EXPNO 11  
PROCNO 1

F2 - Acquisition Parameters  
Date\_ 20170410  
Time 23.23 h  
INSTRUM spect  
PROBHD Z108618\_0505 (  
PULPROG zg30  
TD 65536  
SOLVENT CDCl3  
NS 16  
DS 2  
SWH 8012.820 Hz  
FIDRES 0.244532 Hz  
AQ 4.0894465 sec  
RG 143.73  
DW 62.400 usec  
DE 6.50 usec  
TE 298.3 K  
D1 1.00000000 sec  
TD0 1  
SFO1 400.2604716 MHz  
NUC1 1H  
P1 14.25 usec  
PLW1 14.00000000 W

F2 - Processing parameters  
SI 65536  
SF 400.2580105 MHz  
WDW EM  
SSB 0  
LB 0.30 Hz  
GB 0  
PC 1.00

Signature SIF VIT VELLORE  
NR-417-PCT-6

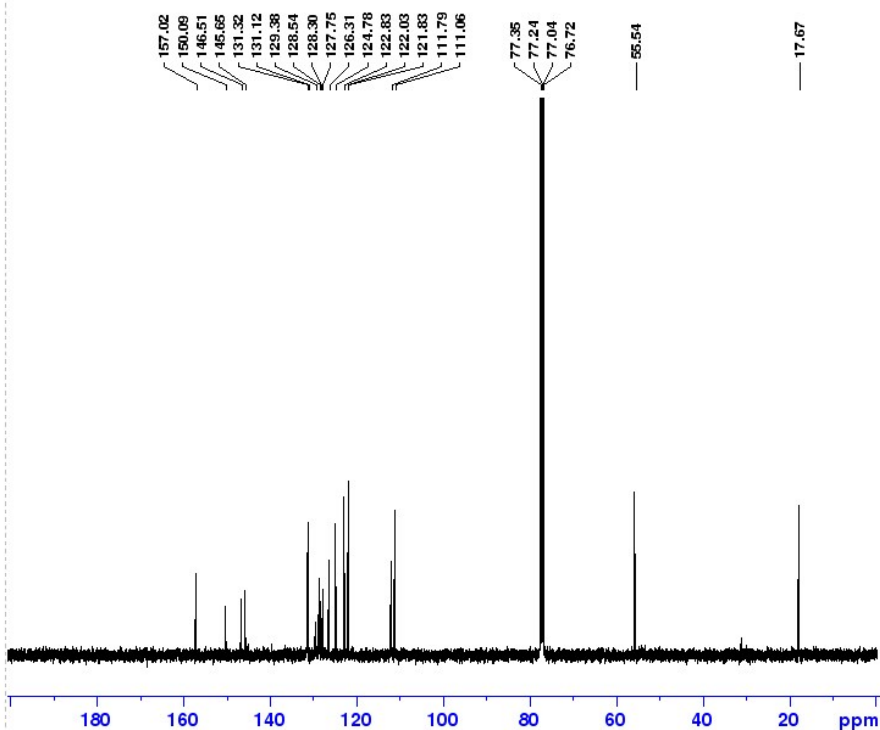

Current Data Parameters  
NAME Derivative-4-2-Methoxy  
EXPNO 12  
PROCNO 1

F2 - Acquisition Parameters  
Date\_ 20170410  
Time 23.52 h  
INSTRUM spect  
PROBHD Z108618\_0505 (  
PULPROG zgpg30  
TD 65536  
SOLVENT CDCl3  
NS 512  
DS 4  
SWH 24038.461 Hz  
FIDRES 0.733596 Hz  
AQ 1.3631488 sec  
RG 156.91  
DW 20.800 usec  
DE 6.50 usec  
TE 299.1 K  
D1 2.00000000 sec  
D11 0.03000000 sec  
TD0 1  
SFO1 100.6550186 MHz  
NUC1 13C  
P1 9.80 usec  
PLW1 58.0000000 W  
SFO2 400.2596010 MHz  
NUC2 1H  
CPDPRG2 waltz16  
PCPD2 90.00 usec  
PLW2 14.0000000 W  
PLW12 0.35097000 W  
PLW13 0.17654000 W

F2 - Processing parameters  
SI 32768  
SF 100.6449542 MHz  
WDW EM  
SSB 0  
LB 1.00 Hz  
GB 0  
PC 1.40

$^1\text{H-NMR}$  and  $^{13}\text{C-NMR}$  of compound **6i** in  $\text{CDCl}_3$

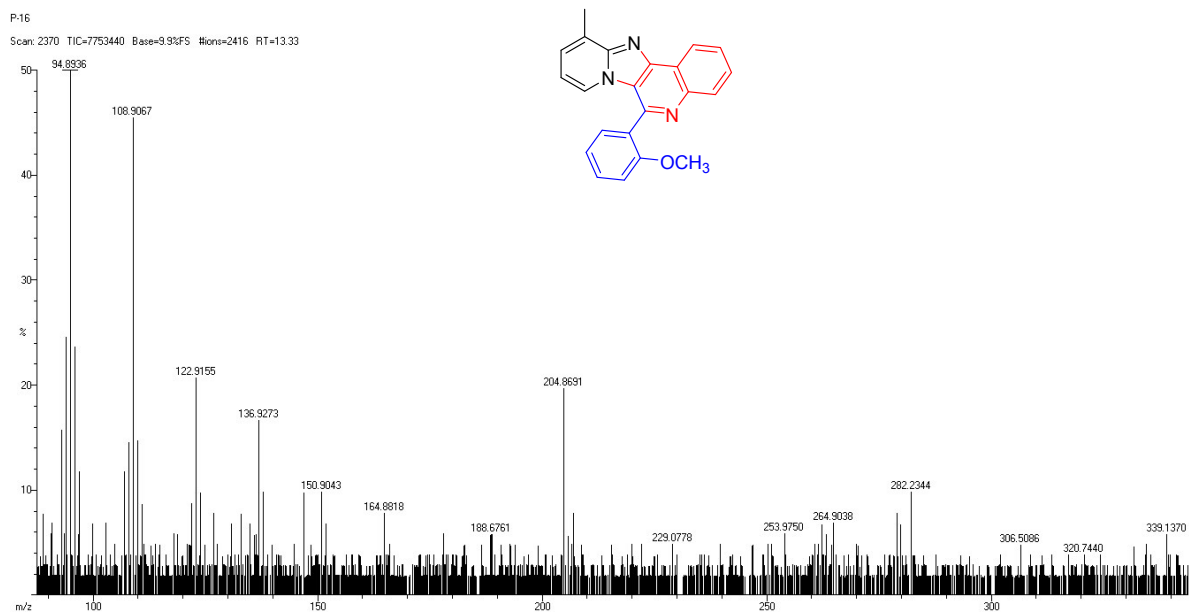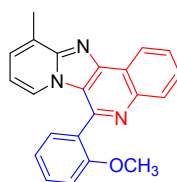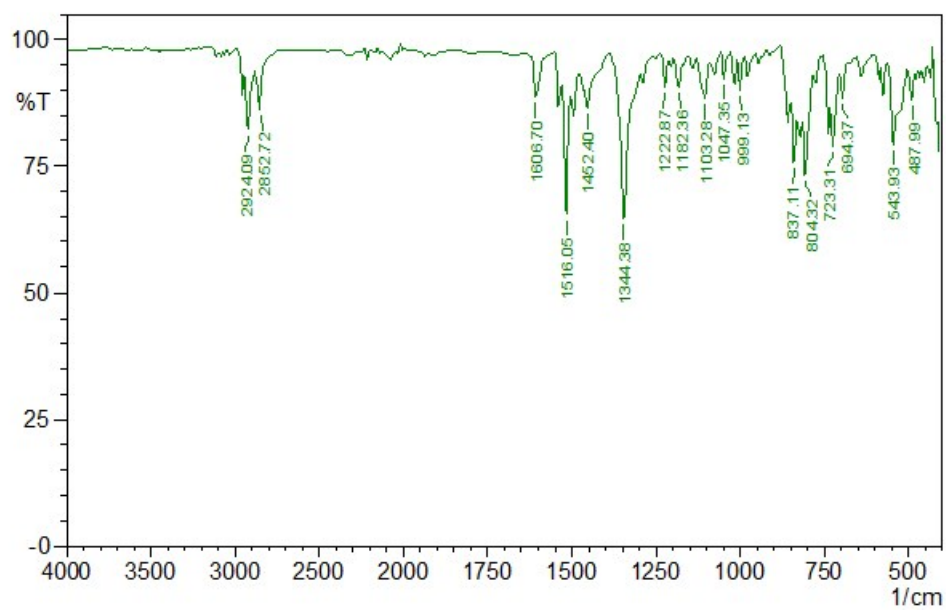

HRMS and IR of compound **6i**

Signature SIF VIT VELLORE  
NR-417-PCT-5

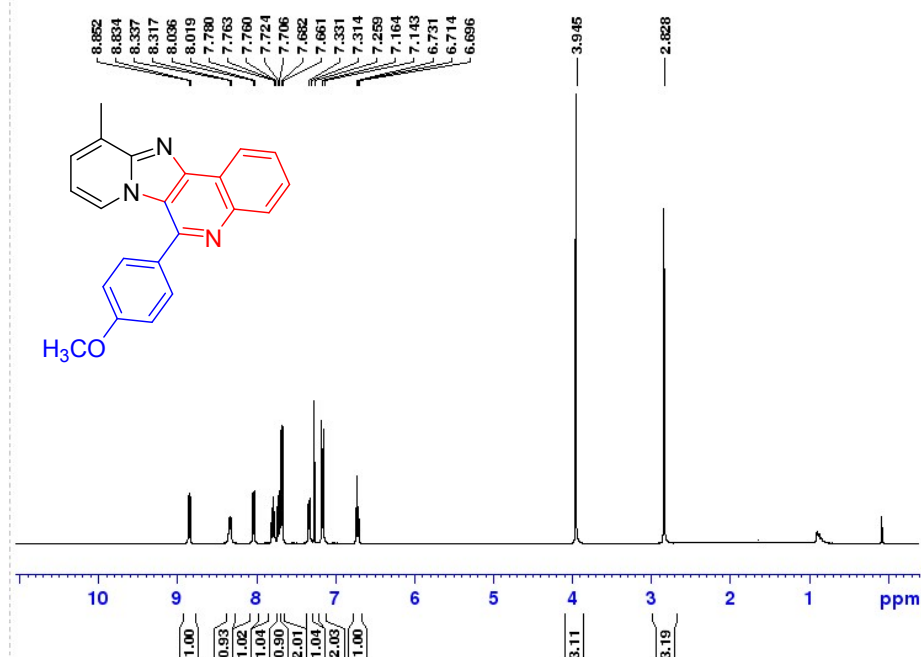

Current Data Parameters  
NAME Derivative-3- 4-Methoxy  
EXPNO 7  
PROCNO 1

F2 - Acquisition Parameters  
Date\_ 20170407  
Time 20.39 h  
INSTRUM spect  
PROBHD Z108618\_0505 (  
PULPROG zg30  
TD 65536  
SOLVENT CDCl3  
NS 16  
DS 2  
SWH 8012.820 Hz  
FIDRES 0.244532 Hz  
AQ 4.0894465 sec  
RG 175.97  
DW 62.400 usec  
DE 6.50 usec  
TE 298.5 K  
D1 1.0000000 sec  
TD0 1  
SFO1 400.2604716 MHz  
NUC1 1H  
P1 14.25 usec  
PLW1 14.0000000 W

F2 - Processing parameters  
SI 65536  
SF 400.2580099 MHz  
WDW EM  
SSB 0  
LB 0.30 Hz  
GB 0  
PC 1.00

Signature SIF VIT VELLORE  
NR-417-PCT-5

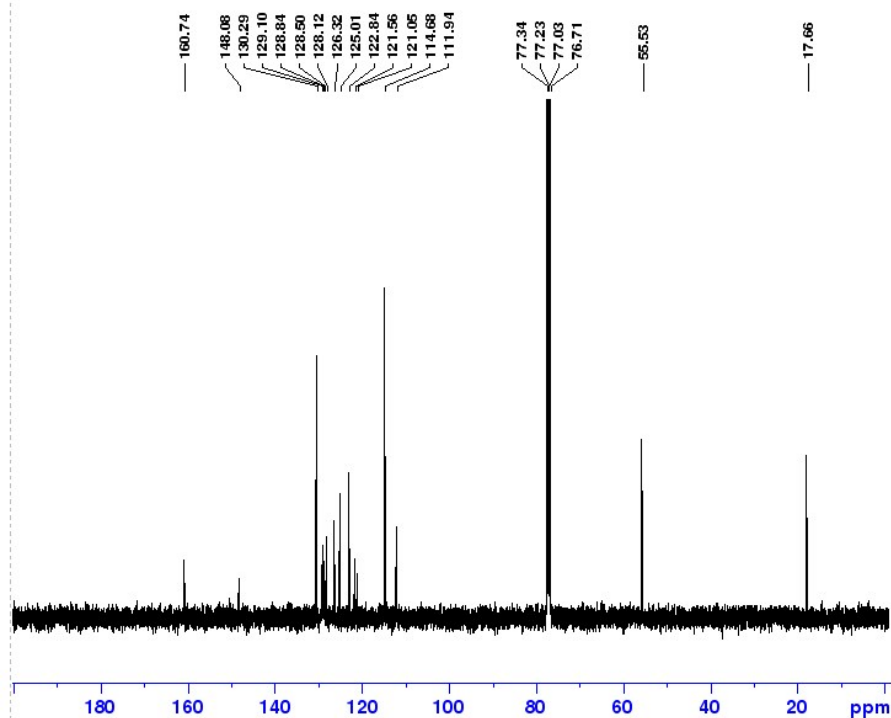

Current Data Parameters  
NAME Derivative-3- 4-Methoxy  
EXPNO 8  
PROCNO 1

F2 - Acquisition Parameters  
Date\_ 20170407  
Time 21.09 h  
INSTRUM spect  
PROBHD Z108618\_0505 (  
PULPROG zgpg30  
TD 65536  
SOLVENT CDCl3  
NS 512  
DS 4  
SWH 24038.461 Hz  
FIDRES 0.733596 Hz  
AQ 1.3631488 sec  
RG 156.91  
DW 20.800 usec  
DE 6.50 usec  
TE 299.2 K  
D1 2.0000000 sec  
D11 0.0300000 sec  
TD0 1  
SFO1 100.6550186 MHz  
NUC1 13C  
P1 9.50 usec  
PLW1 58.0000000 W  
SFO2 400.2596010 MHz  
NUC2 1H  
CPDPRG[2] waltz16  
PCPD2 90.00 usec  
PLW2 14.0000000 W  
PLW12 0.35097000 W  
PLW13 0.17654000 W

F2 - Processing parameters  
SI 32768  
SF 100.6449542 MHz  
WDW EM  
SSB 0  
LB 1.00 Hz  
GB 0  
PC 1.40

$^1\text{H-NMR}$  and  $^{13}\text{C-NMR}$  of compound **6j** in  $\text{CDCl}_3$

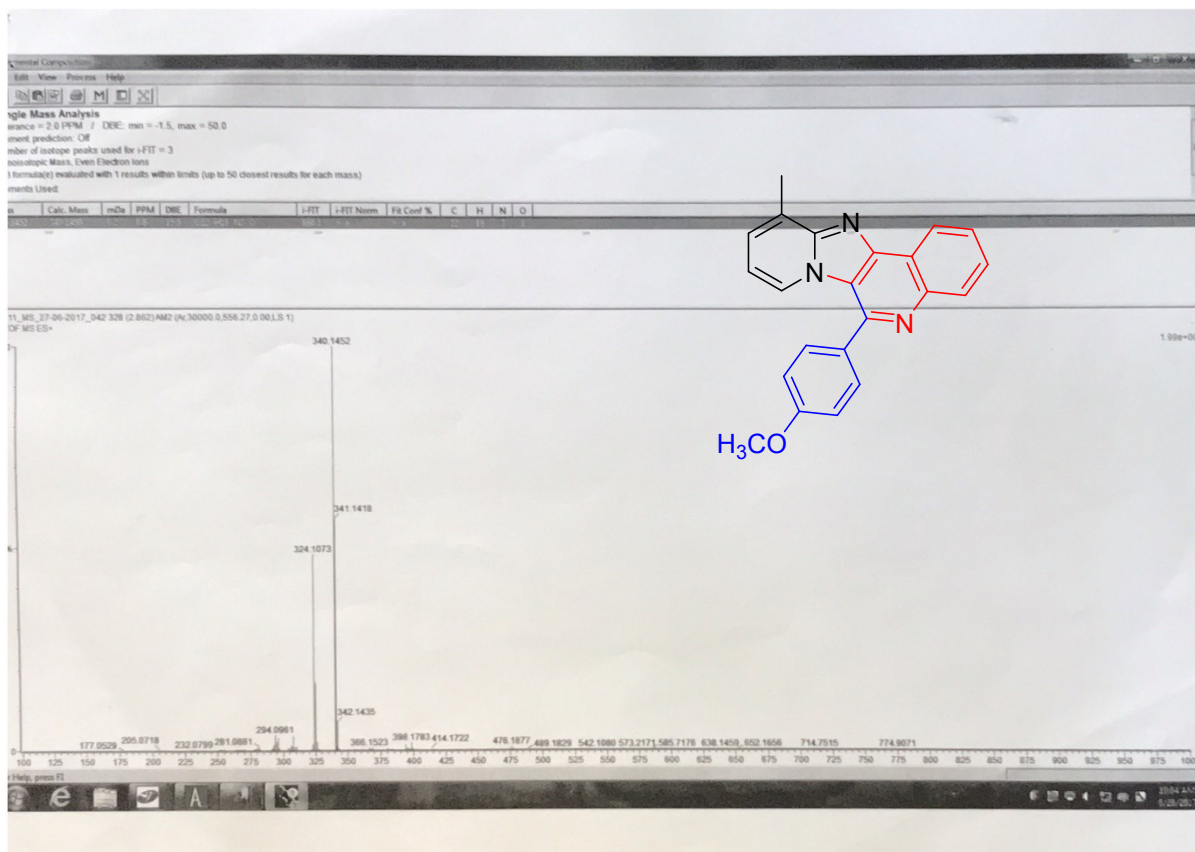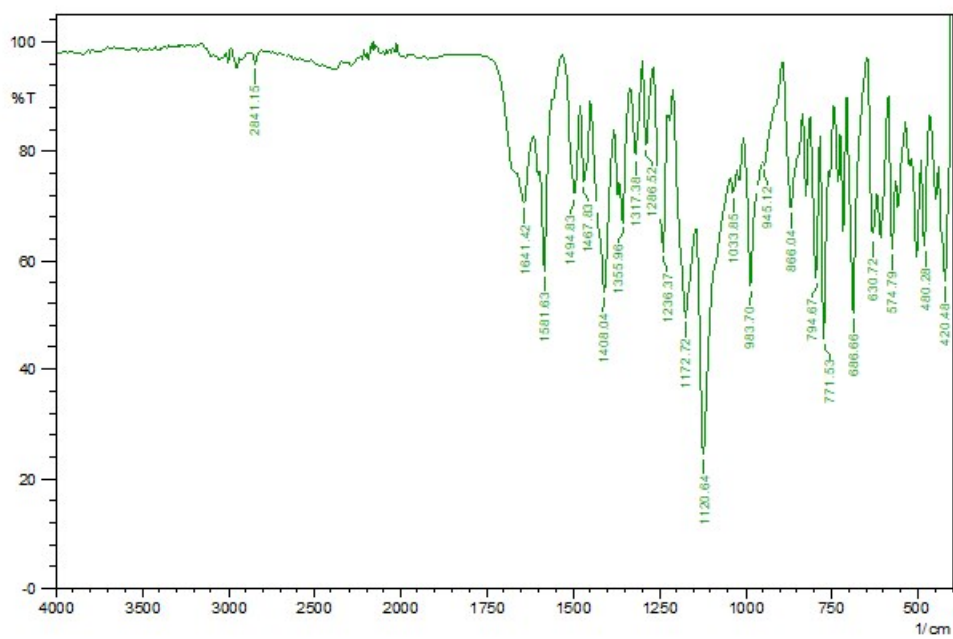

HRMS and IR of compound **6j**.



Signature SIF VIT VELLORE  
NR-417-PCT-7

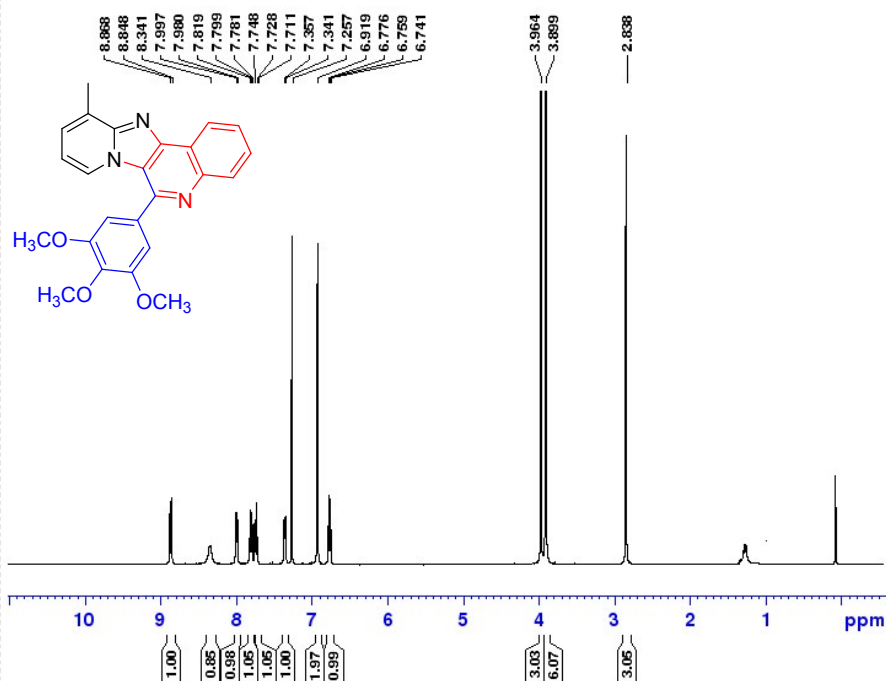

Current Data Parameters  
NAME Derivative-5-3,4,5 tri me  
EXPNO 16  
PROCNO 1

F2 - Acquisition Parameters  
Date\_ 20170412  
Time 17.13 h  
INSTRUM spect  
PROBHD Z108618\_0505 (  
PULPROG zg30  
TD 65536  
SOLVENT CDCl3  
NS 16  
DS 2  
SWH 8012.820 Hz  
FIDRES 0.244532 Hz  
AQ 4.0894465 sec  
RG 199.6  
DW 62.400 usec  
DE 6.50 usec  
TE 299.7 K  
D1 1.00000000 sec  
TD0 1  
SFO1 400.2604716 MHz  
NUC1 1H  
P1 14.25 usec  
PLW1 14.00000000 W

F2 - Processing parameters  
SI 65536  
SF 400.2580107 MHz  
WDW EM  
SSB 0  
LB 0.30 Hz  
GB 0  
PC 1.00

Signature SIF VIT VELLORE  
NR-417-PCT-7

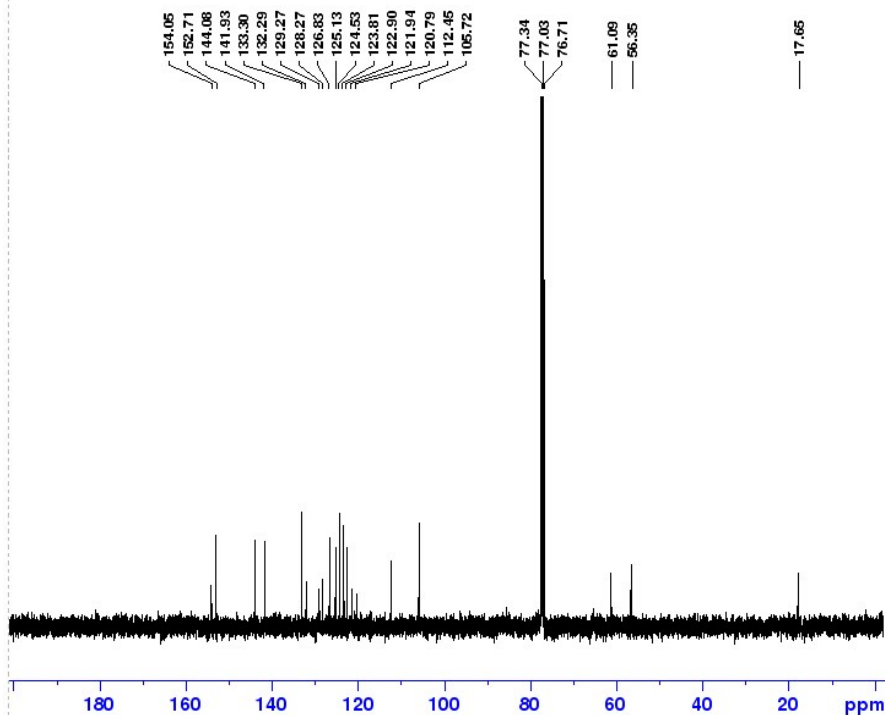

Current Data Parameters  
NAME Derivative-5-3,4,5 tri me  
EXPNO 17  
PROCNO 1

F2 - Acquisition Parameters  
Date\_ 20170412  
Time 17.33 h  
INSTRUM spect  
PROBHD Z108618\_0505 (  
PULPROG zgpg30  
TD 65536  
SOLVENT CDCl3  
NS 56  
DS 4  
SWH 24038.461 Hz  
FIDRES 0.733596 Hz  
AQ 1.3631488 sec  
RG 156.91  
DW 20.800 usec  
DE 6.50 usec  
TE 300.1 K  
D1 2.00000000 sec  
D11 0.03000000 sec  
TD0 1  
SFO1 100.6550186 MHz  
NUC1 13C  
P1 9.80 usec  
PLW1 58.00000000 W  
SFO2 400.2596010 MHz  
NUC2 1H  
CPDPRG[2] waltz16  
PCPD2 90.00 usec  
PLW2 14.00000000 W  
PLW12 0.35097000 W  
PLW13 0.17654000 W

F2 - Processing parameters  
SI 32768  
SF 100.6449542 MHz  
WDW EM  
SSB 0  
LB 1.00 Hz  
GB 0  
PC 1.40

$^1\text{H-NMR}$  and  $^{13}\text{C-NMR}$  of compound **6k** in  $\text{CDCl}_3$

P-18

Scan: 2010 TIC=7191376 Base=15.63FS Hione=2400 RT=11.46

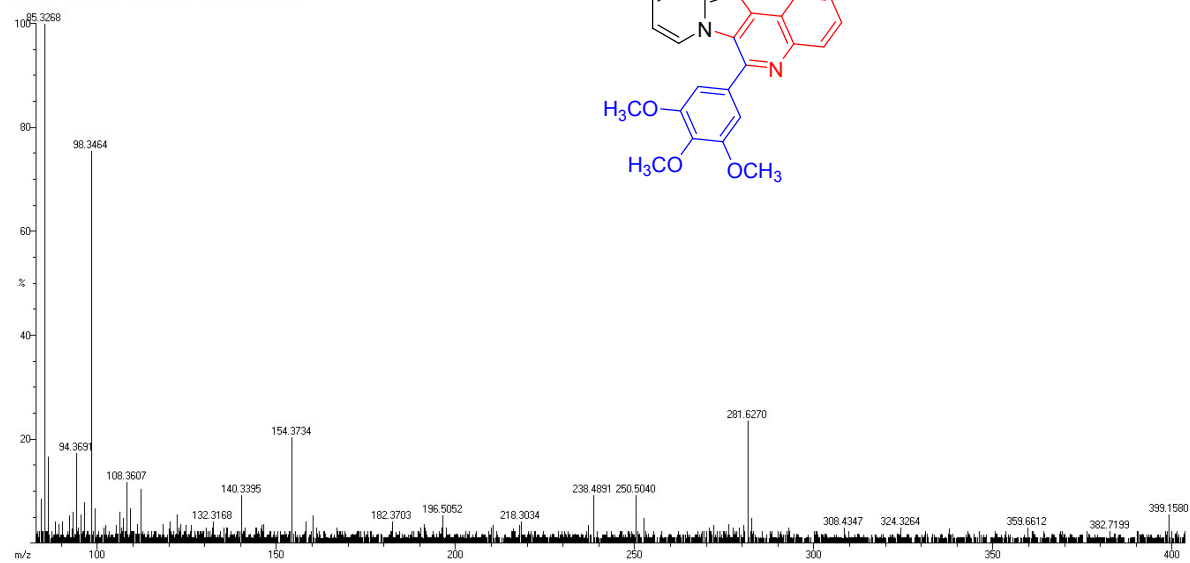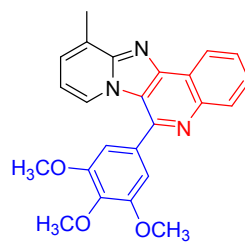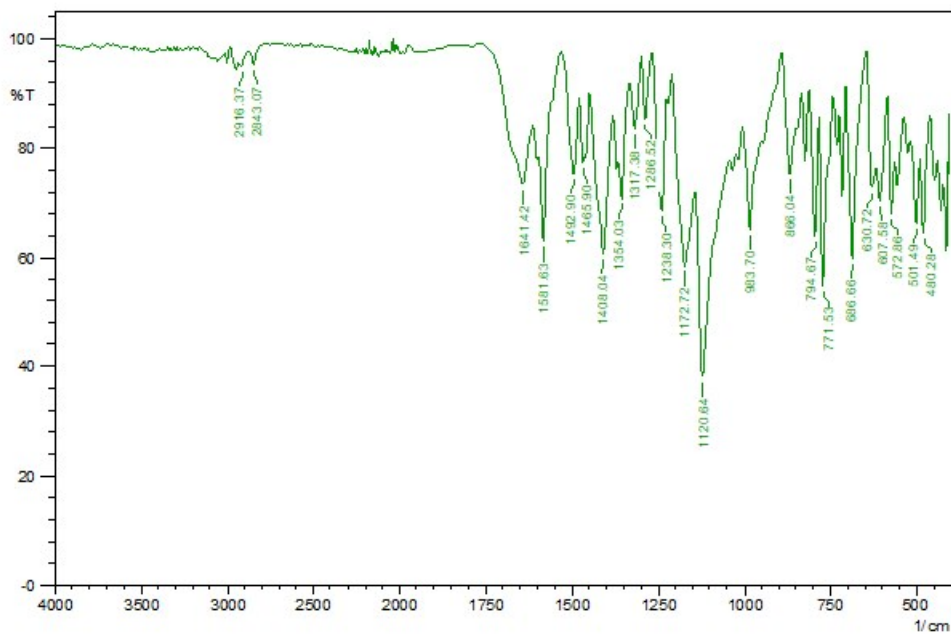

HRMS and IR of compound 6k

Signature SIF VIT VELLORE  
NR-S77-NITRO

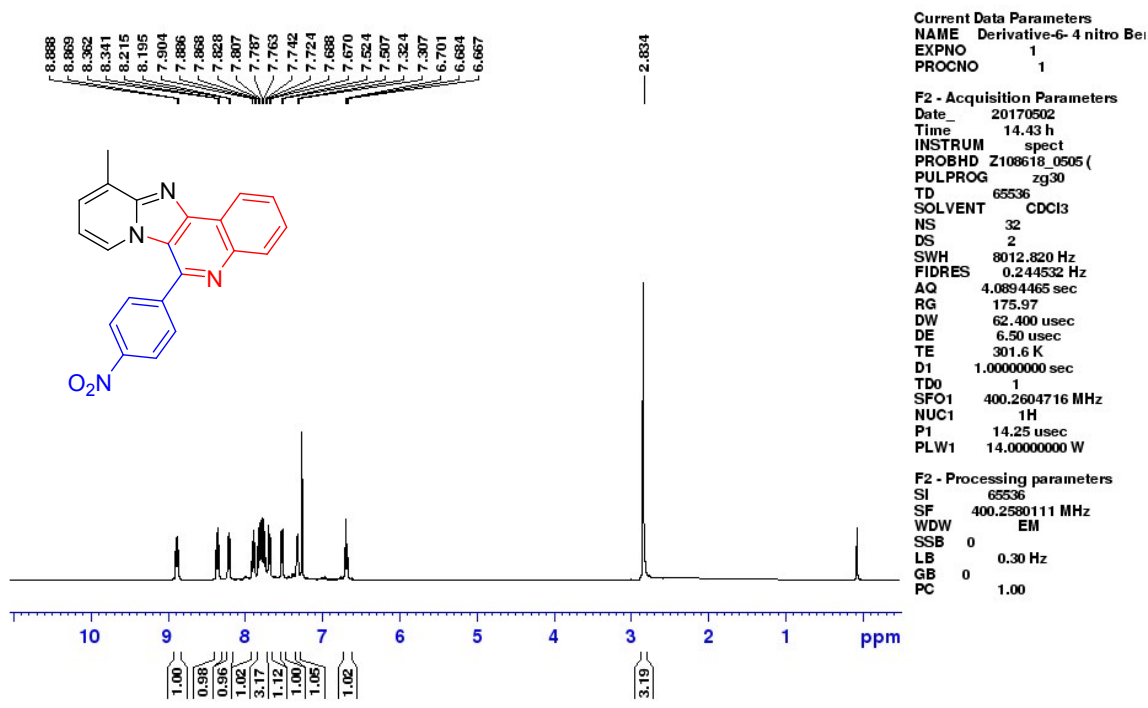

Signature SIF VIT VELLORE  
NR-S77-NITRO

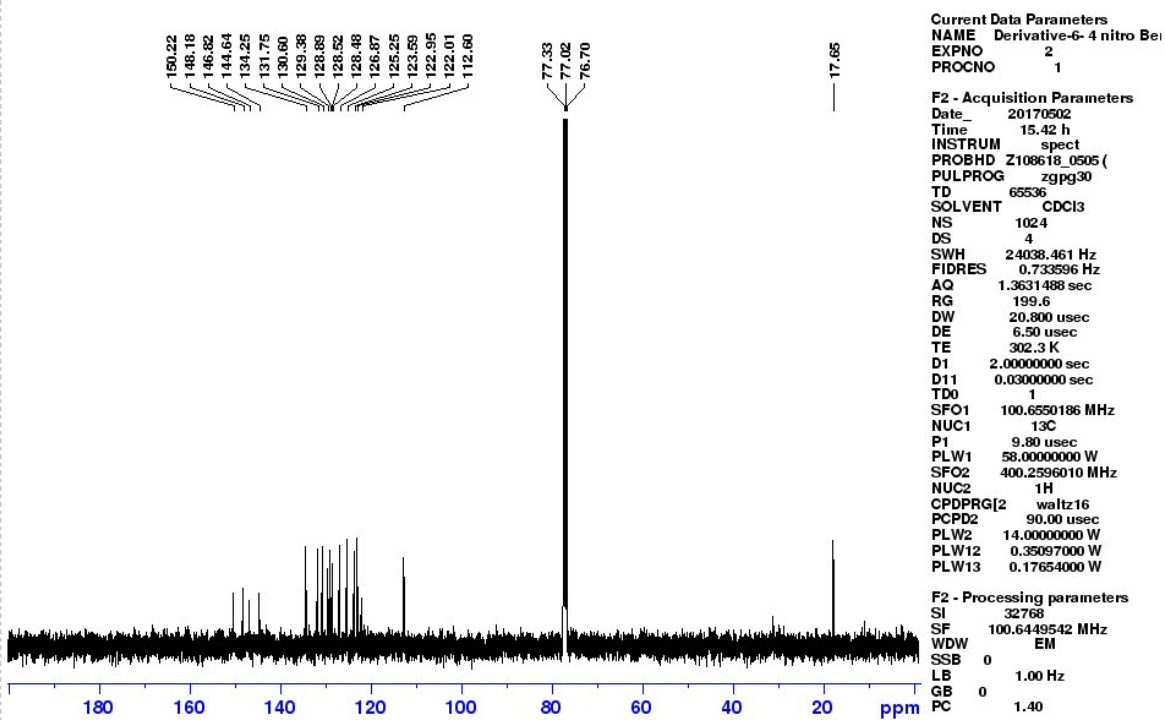

<sup>1</sup>H-NMR and <sup>13</sup>C-NMR of compound 6l in CDCl<sub>3</sub>.

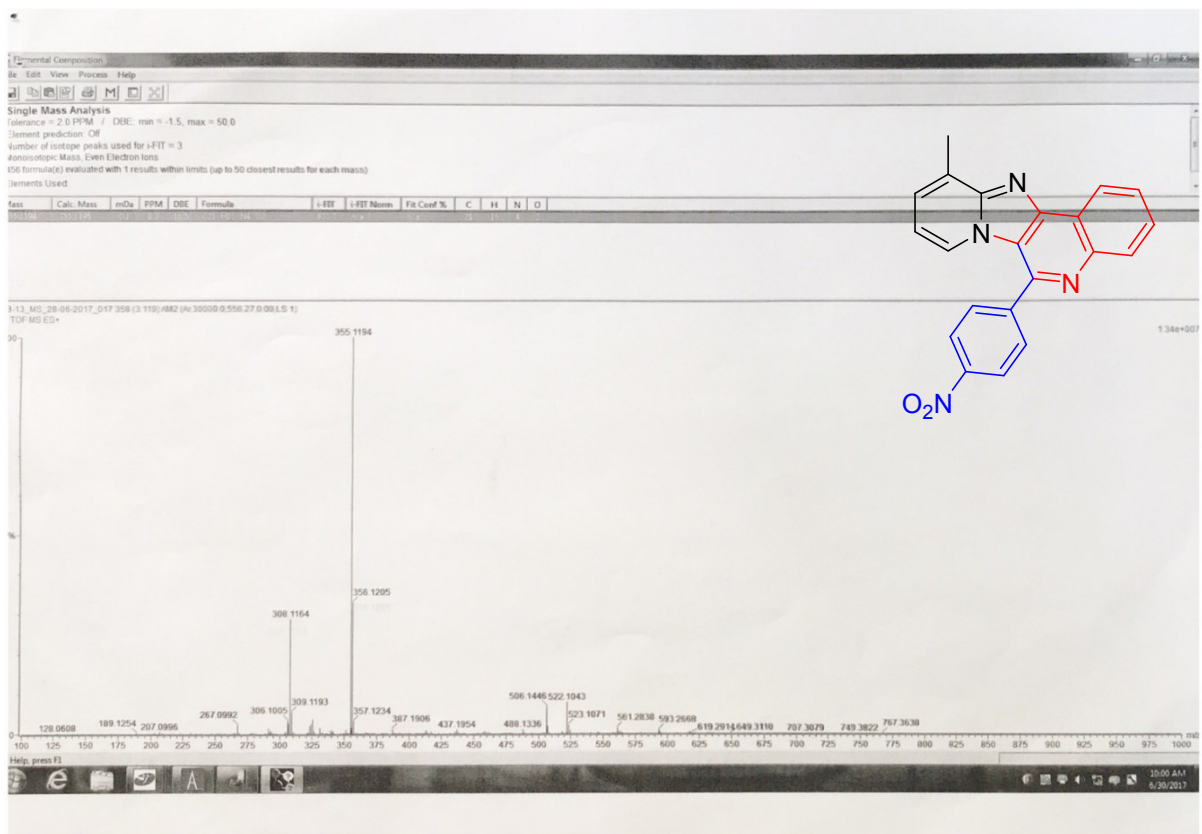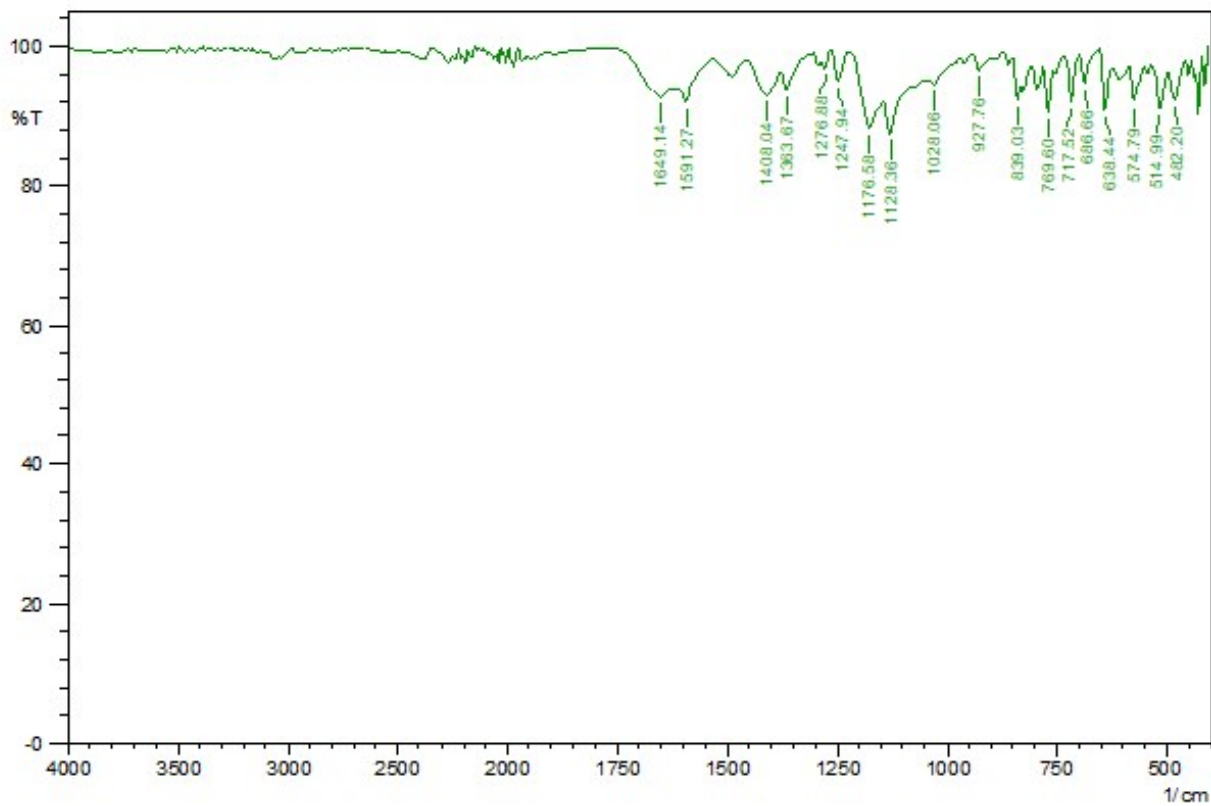

HRMS and IR of compound **61**

Signature SIF VIT VELLORE  
NR-PCT-577-9

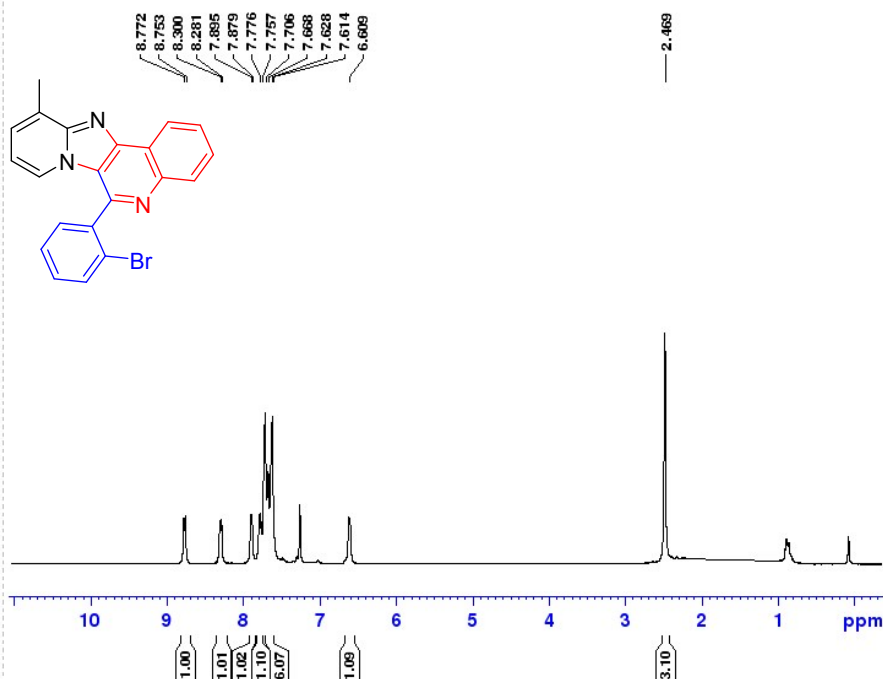

Current Data Parameters  
NAME Derivative-2-Br-Benzak  
EXPNO 9  
PROCNO 1

F2 - Acquisition Parameters  
Date\_ 20170506  
Time 12.24 h  
INSTRUM spect  
PROBHD Z108618\_0505 (  
PULPROG zg30  
TD 65536  
SOLVENT CDCl3  
NS 16  
DS 2  
SWH 8012.820 Hz  
FIDRES 0.244532 Hz  
AQ 4.0894465 sec  
RG 156.91  
DW 62.400 usec  
DE 6.50 usec  
TE 299.1 K  
D1 1.0000000 sec  
TD0 1  
SFO1 400.2604716 MHz  
NUC1 1H  
P1 14.25 usec  
PLW1 14.0000000 W

F2 - Processing parameters  
SI 65536  
SF 400.2580126 MHz  
WDW EM  
SSB 0  
LB 0.30 Hz  
GB 0  
PC 1.00

Signature SIF VIT VELLORE  
NR-PCT-577-9

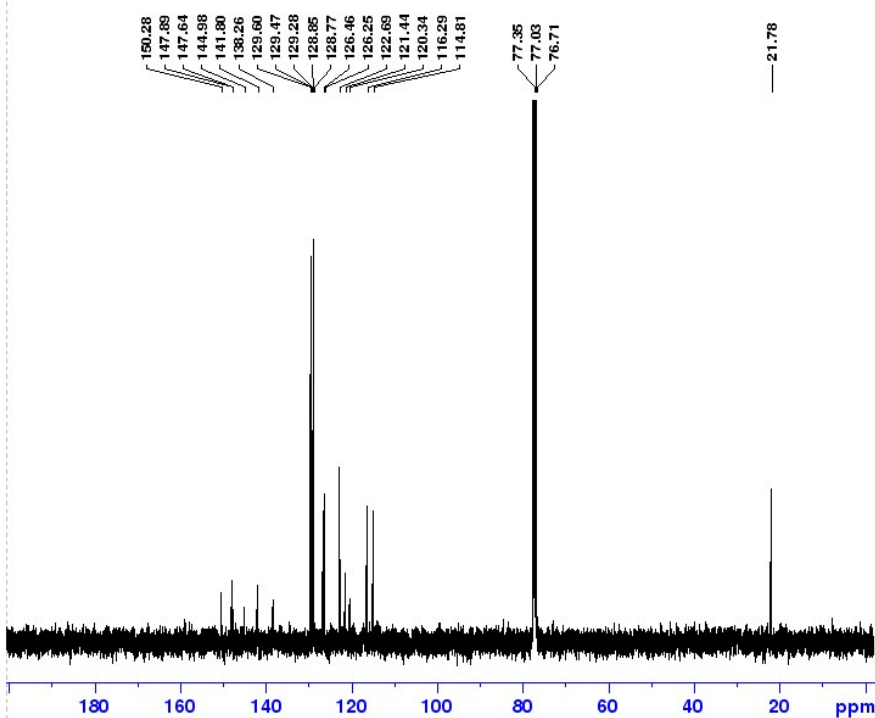

Current Data Parameters  
NAME Derivative-2-Br-Benzak  
EXPNO 10  
PROCNO 1

F2 - Acquisition Parameters  
Date\_ 20170506  
Time 15.30 h  
INSTRUM spect  
PROBHD Z108618\_0505 (  
PULPROG zgpg30  
TD 65536  
SOLVENT CDCl3  
NS 512  
DS 4  
SWH 24038.461 Hz  
FIDRES 0.733596 Hz  
AQ 1.3631488 sec  
RG 156.91  
DW 20.800 usec  
DE 6.50 usec  
TE 299.9 K  
D1 2.0000000 sec  
D11 0.0300000 sec  
TD0 1  
SFO1 100.6550186 MHz  
NUC1 13C  
P1 9.80 usec  
PLW1 58.0000000 W  
SFO2 400.2596010 MHz  
NUC2 1H  
CPDPRG[2] waltz16  
PCPD2 90.00 usec  
PLW2 14.0000000 W  
PLW12 0.35097000 W  
PLW13 0.17654000 W

F2 - Processing parameters  
SI 32768  
SF 100.6449542 MHz  
WDW EM  
SSB 0  
LB 1.00 Hz  
GB 0  
PC 1.40

$^1\text{H-NMR}$  and  $^{13}\text{C-NMR}$  of compound **6m** in  $\text{CDCl}_3$ .

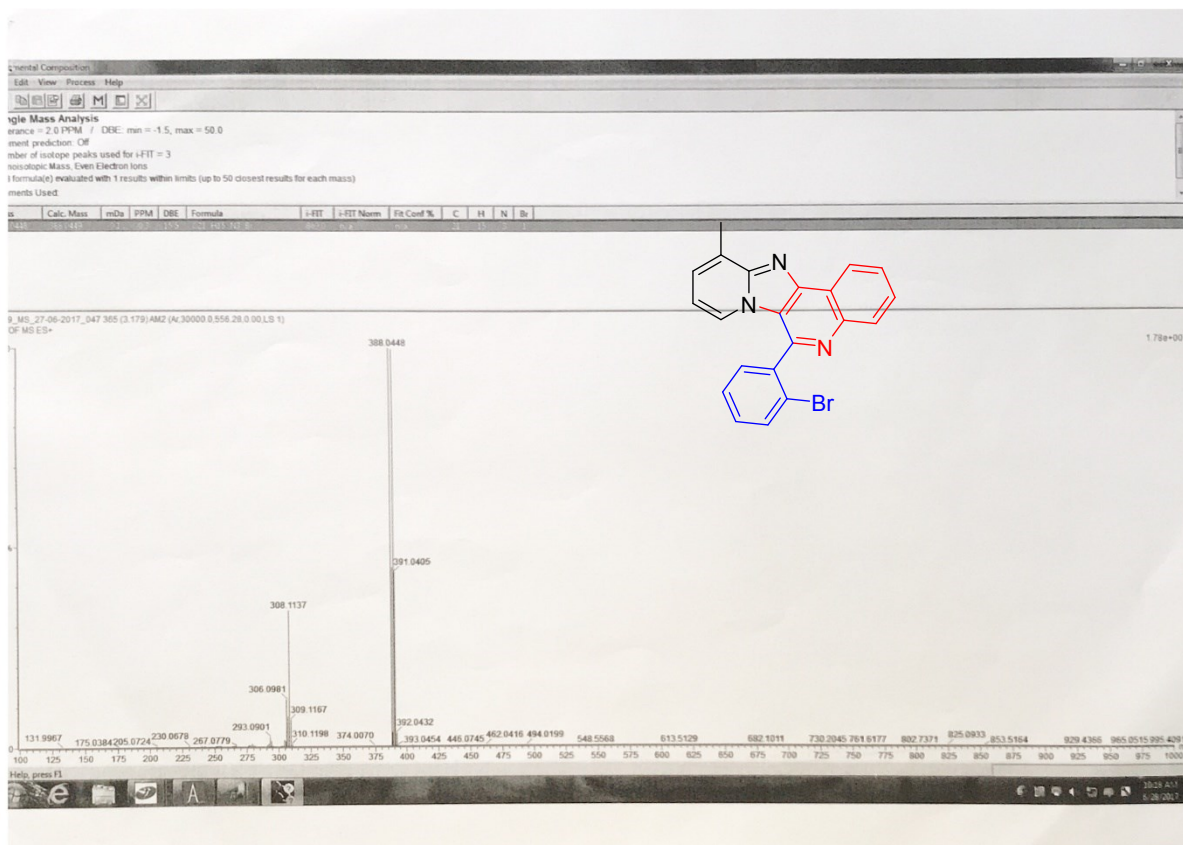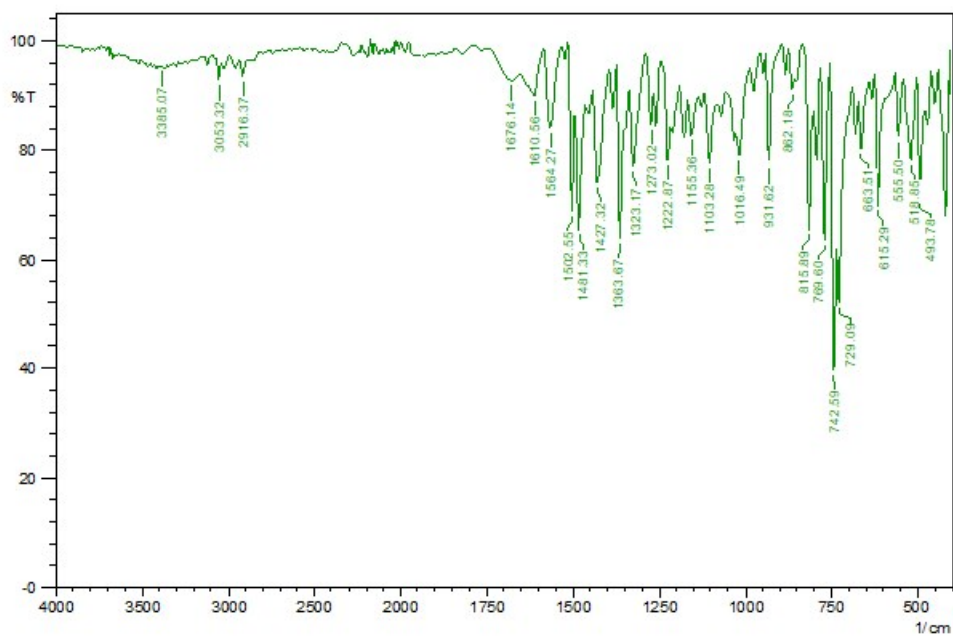

HRMS and IR of compound 6m.

Signature SIF VIT VELLORE  
NR-517-PCT-10

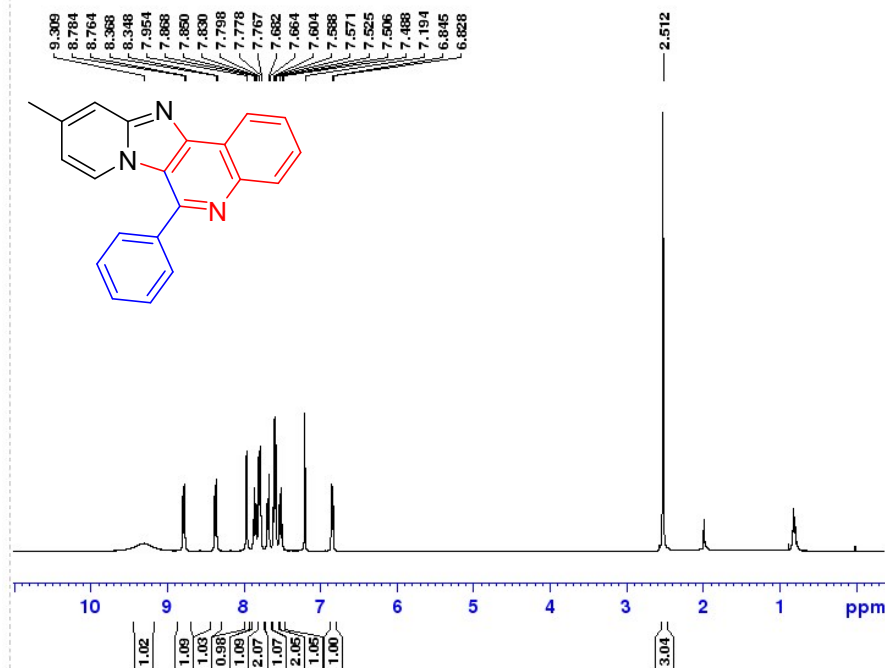

Current Data Parameters  
NAME benzaldehyde derivati  
EXPNO 20  
PROCNO 1

F2 - Acquisition Parameters  
Date\_ 20170510  
Time 7.13 h  
INSTRUM spect  
PROBHD Z108618\_0505 (  
PULPROG zg30  
TD 65536  
SOLVENT CDCl3  
NS 16  
DS 2  
SWH 8012.820 Hz  
FIDRES 0.244532 Hz  
AQ 4.0894465 sec  
RG 127.79  
DW 62.400 usec  
DE 6.50 usec  
TE 297.7 K  
D1 1.00000000 sec  
TD0 1  
SFO1 400.2604716 MHz  
NUC1 1H  
P1 14.25 usec  
PLW1 14.00000000 W

F2 - Processing parameters  
SI 65536  
SF 400.2580359 MHz  
WDW EM  
SSB 0  
LB 0.30 Hz  
GB 0  
PC 1.00

Signature SIF VIT VELLORE  
ND-517-PCT-10

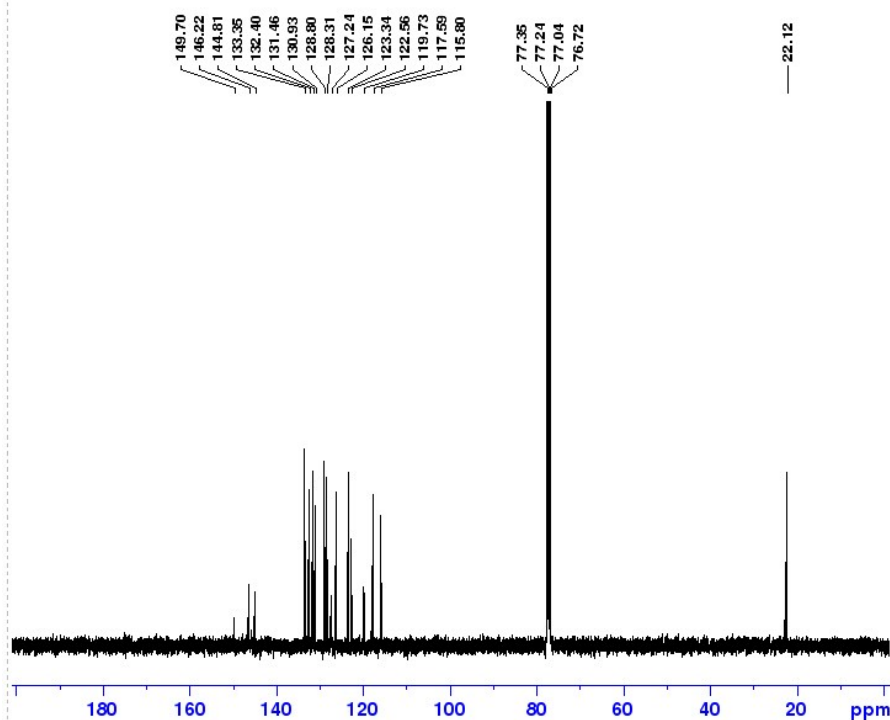

Current Data Parameters  
NAME benzaldehyde derivati  
EXPNO 19  
PROCNO 1

F2 - Acquisition Parameters  
Date\_ 20170508  
Time 16.17 h  
INSTRUM spect  
PROBHD Z108618\_0505 (  
PULPROG zgpg30  
TD 65536  
SOLVENT CDCl3  
NS 512  
DS 4  
SWH 24038.461 Hz  
FIDRES 0.733596 Hz  
AQ 1.3631488 sec  
RG 199.6  
DW 20.800 usec  
DE 6.50 usec  
TE 300.0 K  
D1 2.00000000 sec  
D11 0.03000000 sec  
TD0 1  
SFO1 100.6550186 MHz  
NUC1 13C  
P1 9.80 usec  
PLW1 58.00000000 W  
SFO2 400.2596010 MHz  
NUC2 1H  
CPDPRG[2] waltz16  
PCPD2 90.00 usec  
PLW2 14.00000000 W  
PLW12 0.35097000 W  
PLW13 0.17654000 W

F2 - Processing parameters  
SI 32768  
SF 100.6449542 MHz  
WDW EM  
SSB 0  
LB 1.00 Hz  
GB 0  
PC 1.40

<sup>1</sup>H-NMR and <sup>13</sup>C-NMR of compound **6n** in CDCl<sub>3</sub>.

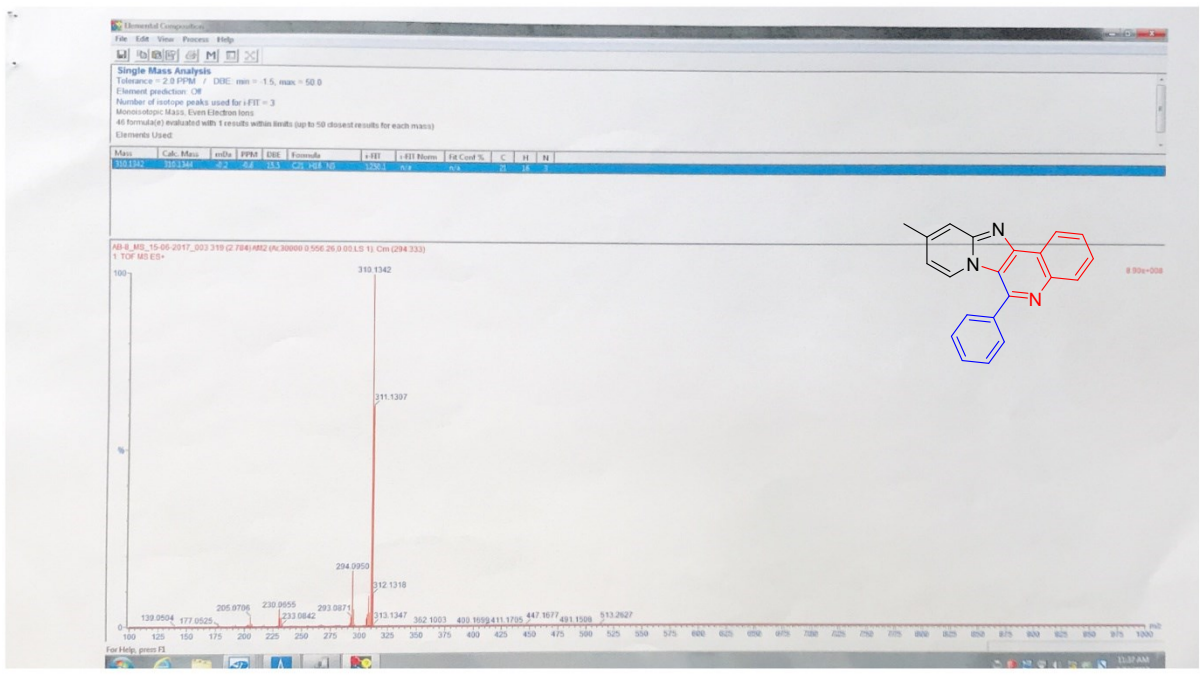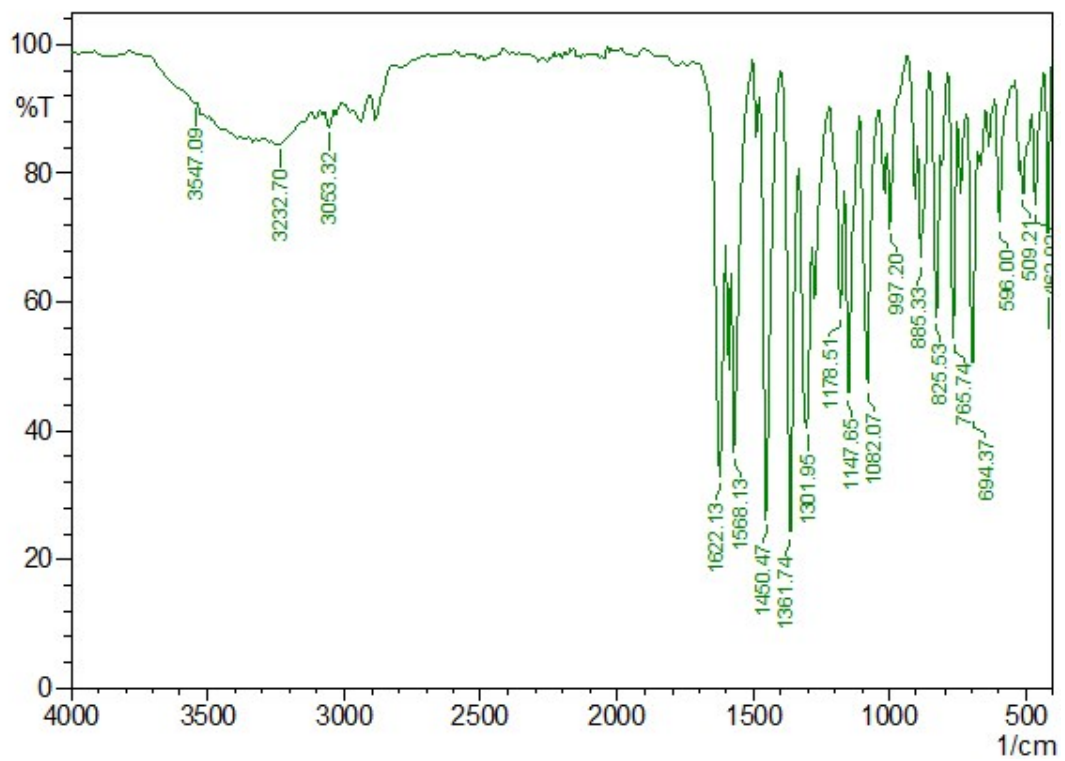

HRMS and IR of compound **6n**.



Signature SIF VIT VELLORE  
NR-517-PCT-13

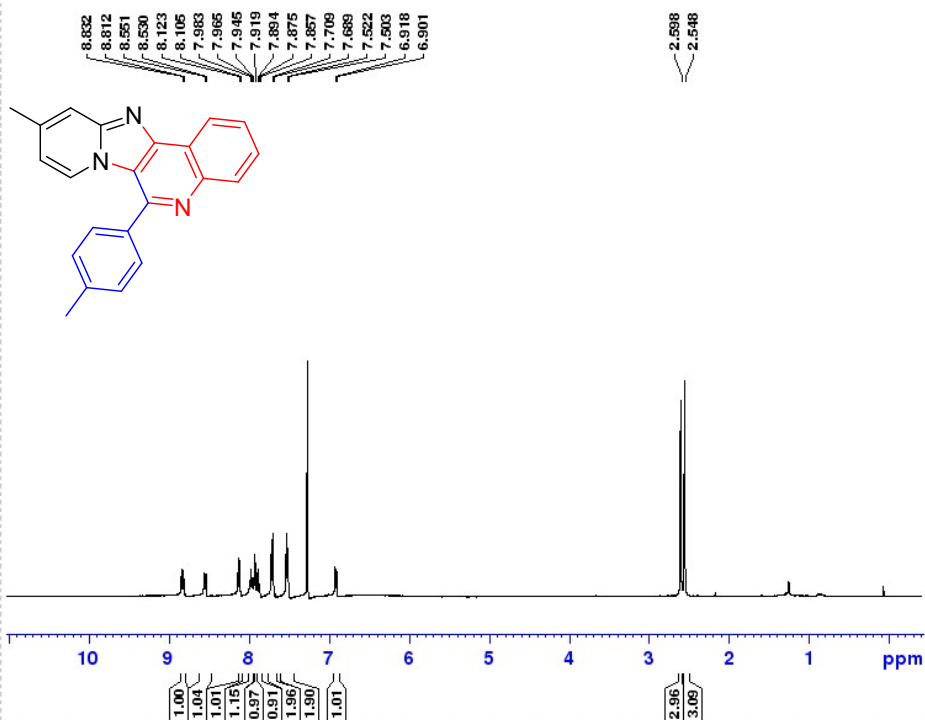

Current Data Parameters  
NAME P-Toulaldehyde deriva  
EXPNO 27  
PROCNO 1

F2 - Acquisition Parameters  
Date\_ 20170512  
Time 16.00 h  
INSTRUM spect  
PROBHD Z108618\_0505 (  
PULPROG zg30  
TD 65536  
SOLVENT CDCl3  
NS 16  
DS 2  
SWH 8012.820 Hz  
FIDRES 0.244532 Hz  
AQ 4.0894465 sec  
RG 199.6  
DW 62.400 usec  
DE 6.50 usec  
TE 300.6 K  
D1 1.0000000 sec  
TD0 1  
SFO1 400.2604716 MHz  
NUC1 1H  
P1 14.25 usec  
PLW1 14.0000000 W

F2 - Processing parameters  
SI 65536  
SF 400.2580113 MHz  
WDW EM  
SSB 0  
LB 0.30 Hz  
GB 0  
PC 1.00

Signature SIF VIT VELLORE  
NR-517-PCT-13

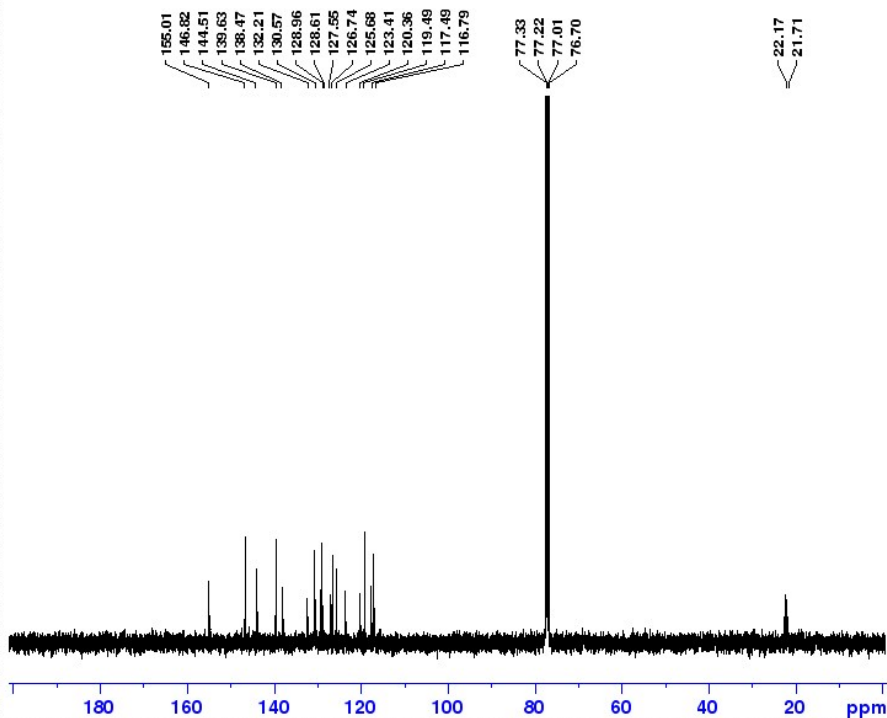

Current Data Parameters  
NAME P-Toulaldehyde deriva  
EXPNO 28  
PROCNO 1

F2 - Acquisition Parameters  
Date\_ 20170512  
Time 16.29 h  
INSTRUM spect  
PROBHD Z108618\_0505 (  
PULPROG zgpg30  
TD 65536  
SOLVENT CDCl3  
NS 512  
DS 4  
SWH 24038.461 Hz  
FIDRES 0.733596 Hz  
AQ 1.3631488 sec  
RG 199.6  
DW 20.800 usec  
DE 6.50 usec  
TE 301.3 K  
D1 2.0000000 sec  
D11 0.0300000 sec  
TD0 1  
SFO1 100.6550186 MHz  
NUC1 13C  
P1 9.80 usec  
PLW1 58.0000000 W  
SFO2 400.2596010 MHz  
NUC2 1H  
CPDPRG2 waltz16  
PCPD2 90.00 usec  
PLW2 14.0000000 W  
PLW12 0.35097000 W  
PLW13 0.17654000 W

F2 - Processing parameters  
SI 32768  
SF 100.6449542 MHz  
WDW EM  
SSB 0  
LB 1.00 Hz  
GB 0  
PC 1.40

$^1\text{H-NMR}$  and  $^{13}\text{C-NMR}$  of compound **60** in  $\text{CDCl}_3$ .

P-19  
Scan: 2007 TIC=7202016 Base=17.5%FS #ions=2425 RT=11.44

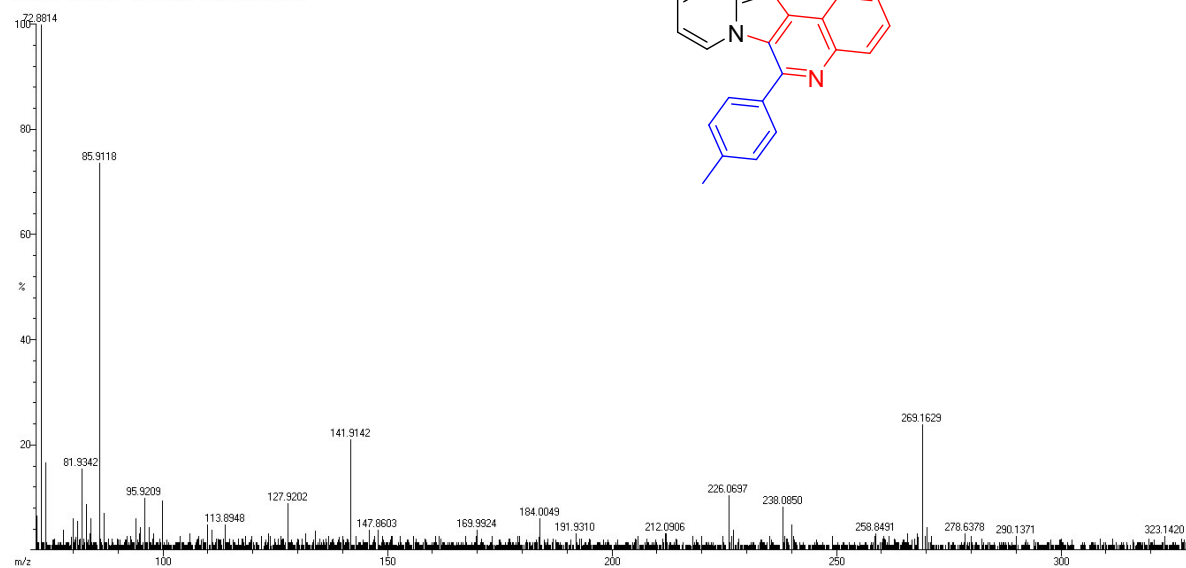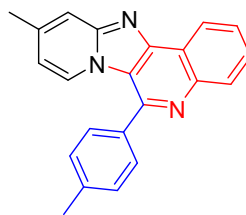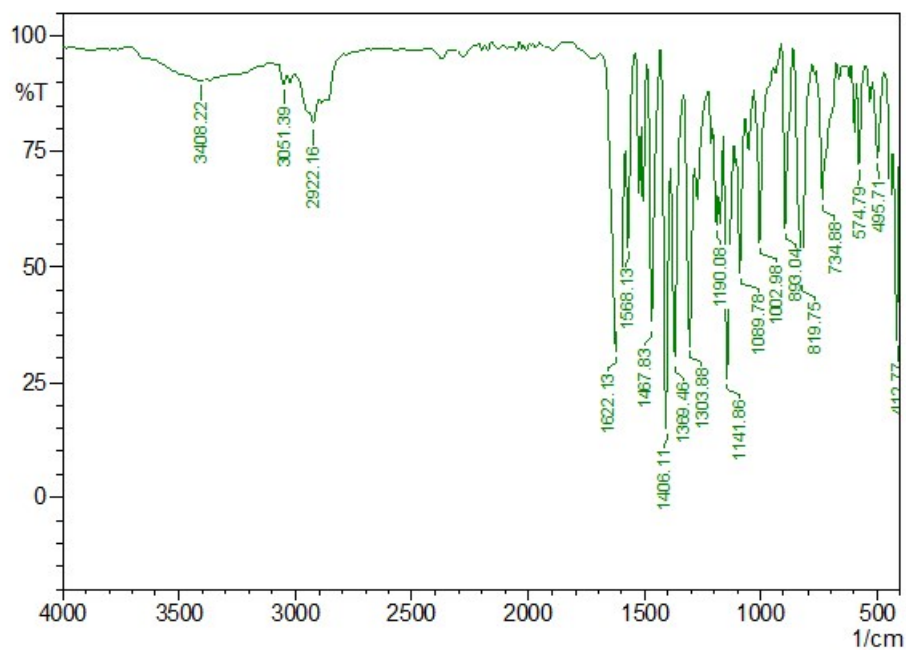

HRMS and IR of compound 60.

Signature SIF VIT VELLORE  
NR-PCT-517-11

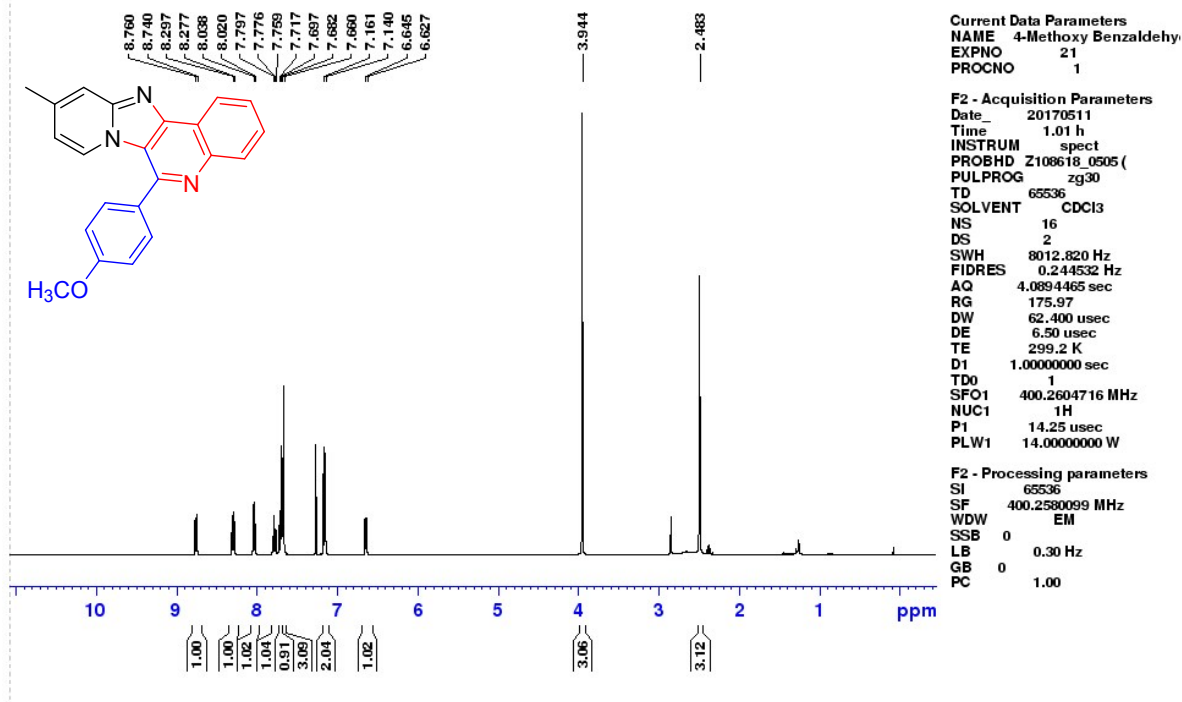

Signature SIF VIT VELLORE  
NR-PCT-517-11

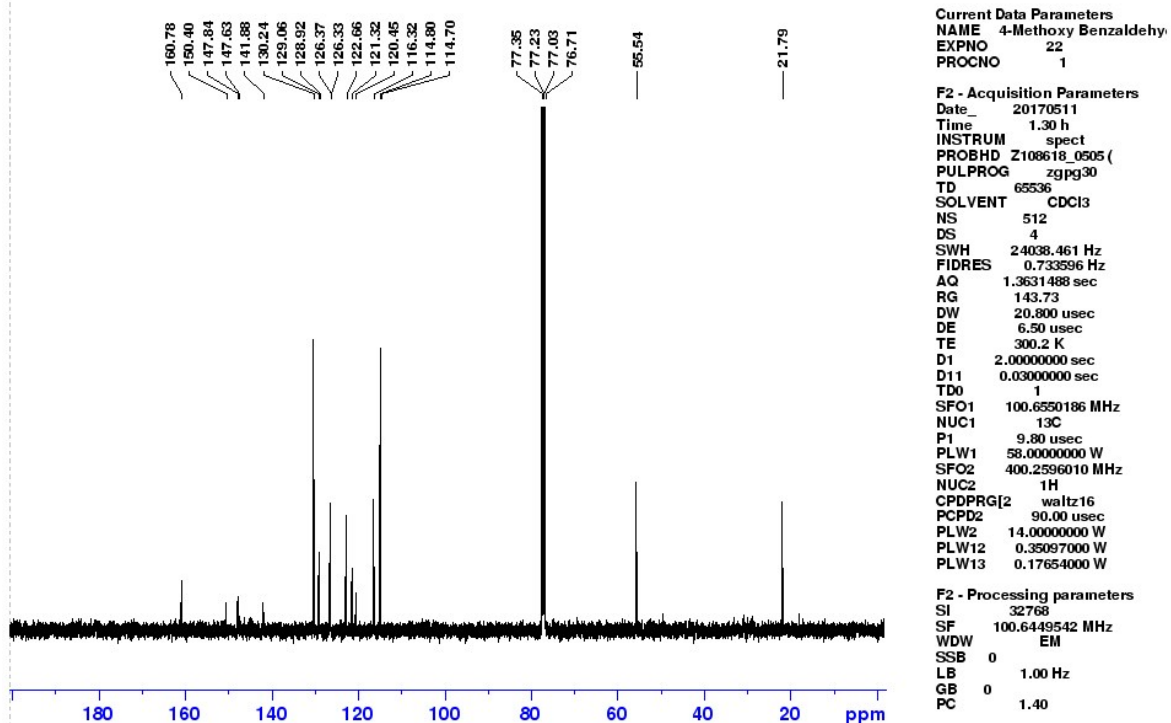

<sup>1</sup>H-NMR and <sup>13</sup>C-NMR of compound **6p** in CDCl<sub>3</sub>.

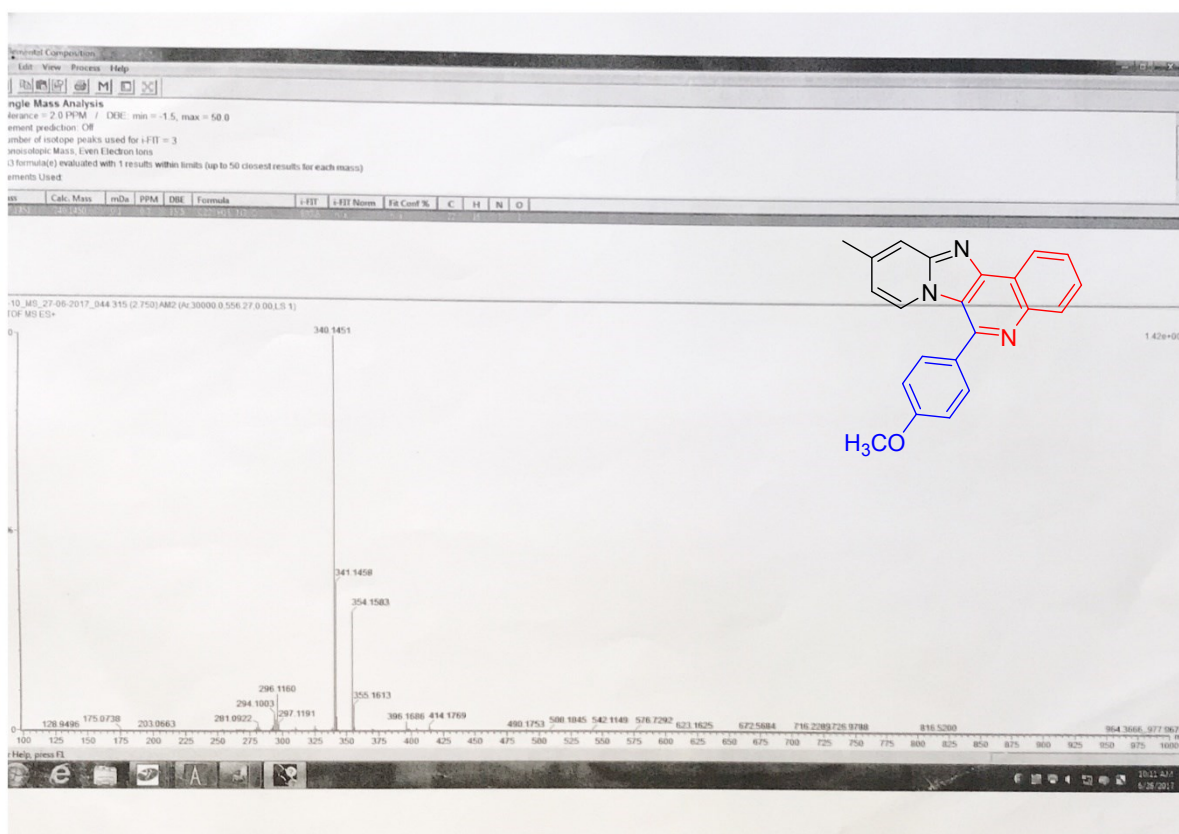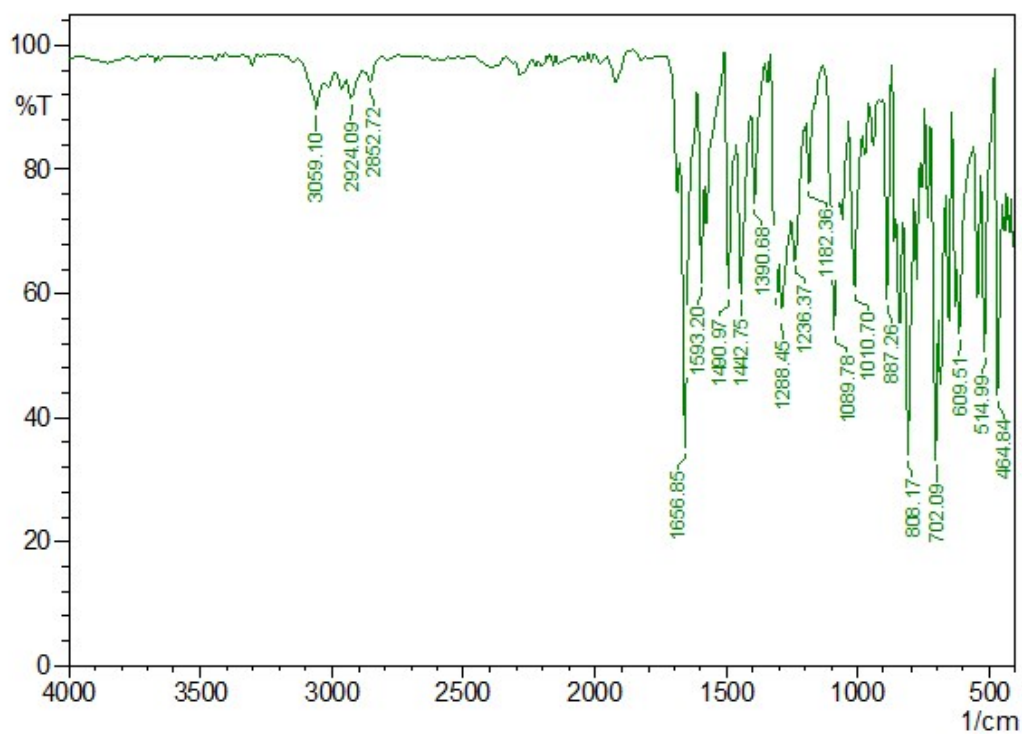

HRMS and IR of compound **6p**.

Signature SIF VIT VELLORE  
NR-PCT-517-12

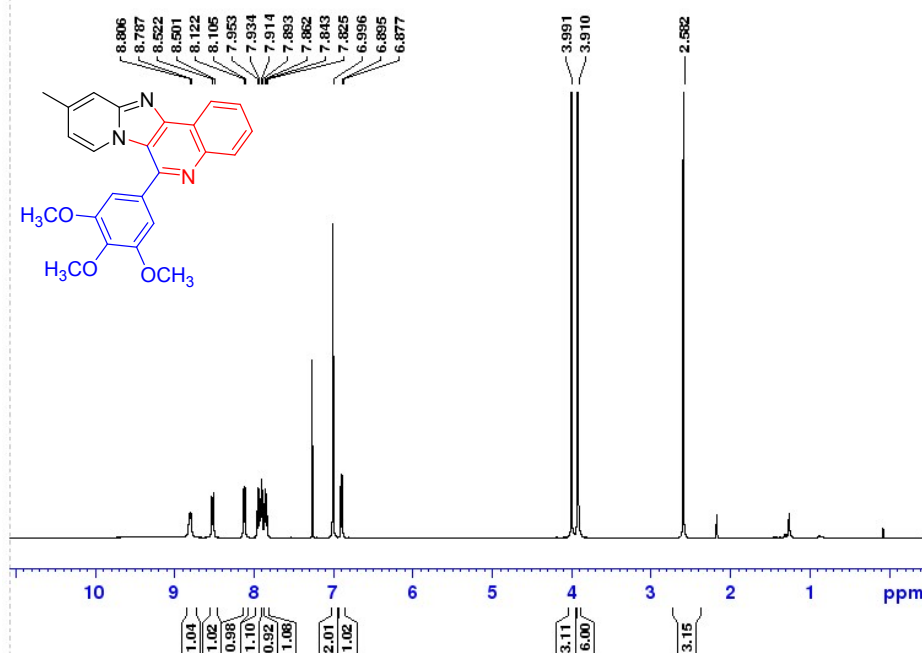

Current Data Parameters  
NAME 3,4,5-Tri methoxy deriv  
EXPNO 25  
PROCNO 1

F2 - Acquisition Parameters  
Date\_ 20170511  
Time 16.18 h  
INSTRUM spect  
PROBHD Z108618\_0505 (  
PULPROG zg30  
TD 65536  
SOLVENT CDCl3  
NS 16  
DS 2  
SWH 8012.820 Hz  
FIDRES 0.244532 Hz  
AQ 4.0894465 sec  
RG 156.91  
DW 62.400 usec  
DE 6.50 usec  
TE 300.9 K  
D1 1.00000000 sec  
TD0 1  
SFO1 400.2604716 MHz  
NUC1 1H  
P1 14.25 usec  
PLW1 14.00000000 W

F2 - Processing parameters  
SI 65536  
SF 400.2590101 MHz  
WDW EM  
SSB 0  
LB 0.30 Hz  
GB 0  
PC 1.00

Signature SIF VIT VELLORE  
NR-PCT-517-12

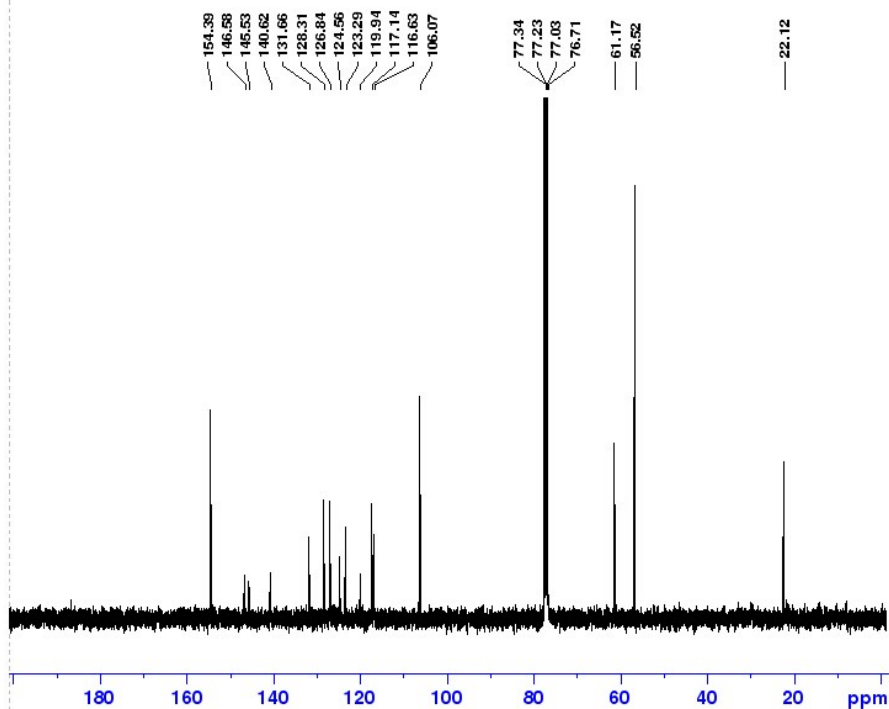

Current Data Parameters  
NAME 3,4,5-Tri methoxy deriv  
EXPNO 26  
PROCNO 1

F2 - Acquisition Parameters  
Date\_ 20170511  
Time 16.48 h  
INSTRUM spect  
PROBHD Z108618\_0505 (  
PULPROG zgpg30  
TD 65536  
SOLVENT CDCl3  
NS 512  
DS 4  
SWH 24038.461 Hz  
FIDRES 0.733596 Hz  
AQ 1.3631488 sec  
RG 199.6  
DW 20.800 usec  
DE 6.50 usec  
TE 301.8 K  
D1 2.00000000 sec  
D11 0.03000000 sec  
TD0 1  
SFO1 100.6550186 MHz  
NUC1 13C  
P1 9.80 usec  
PLW1 58.00000000 W  
SFO2 400.2596010 MHz  
NUC2 1H  
CPDPRG[2] waltz16  
PCPD2 90.00 usec  
PLW2 14.00000000 W  
PLW12 0.35097000 W  
PLW13 0.17654000 W

F2 - Processing parameters  
SI 32768  
SF 100.6449542 MHz  
WDW EM  
SSB 0  
LB 1.00 Hz  
GB 0  
PC 1.40

<sup>1</sup>H-NMR and <sup>13</sup>C-NMR of compound **6q** in CDCl<sub>3</sub>.

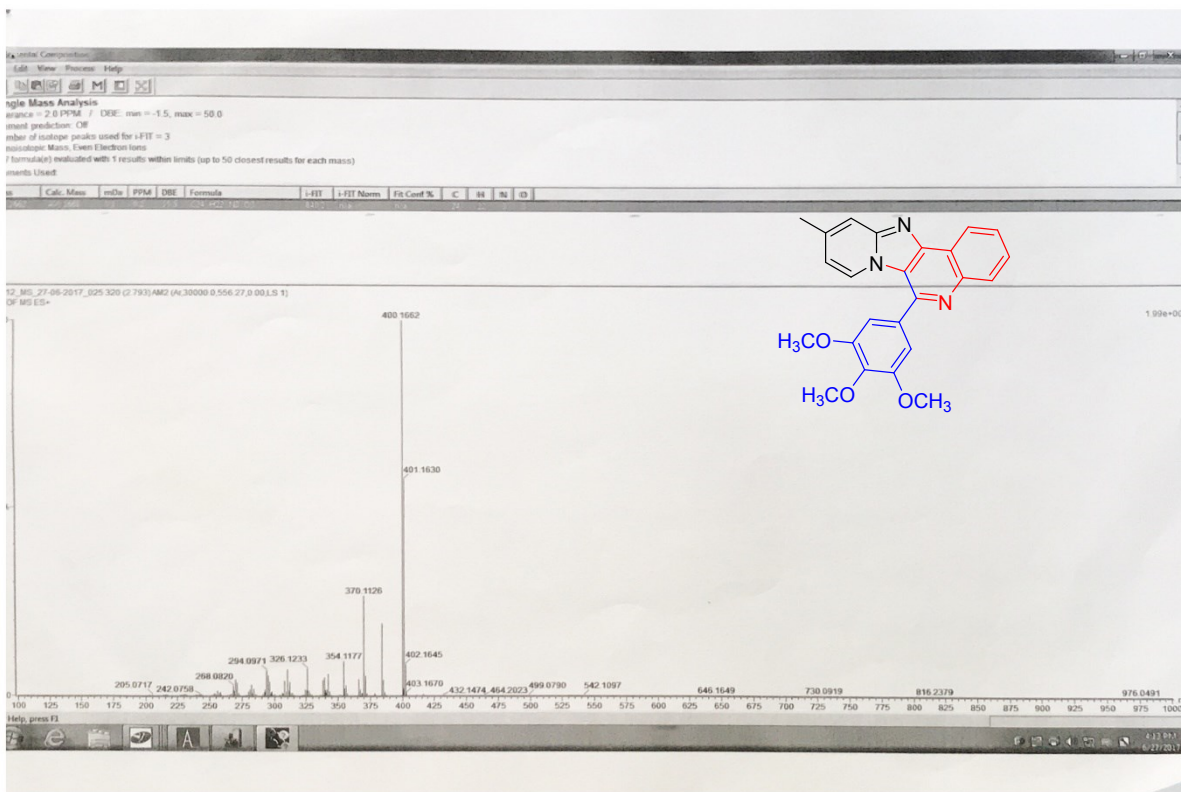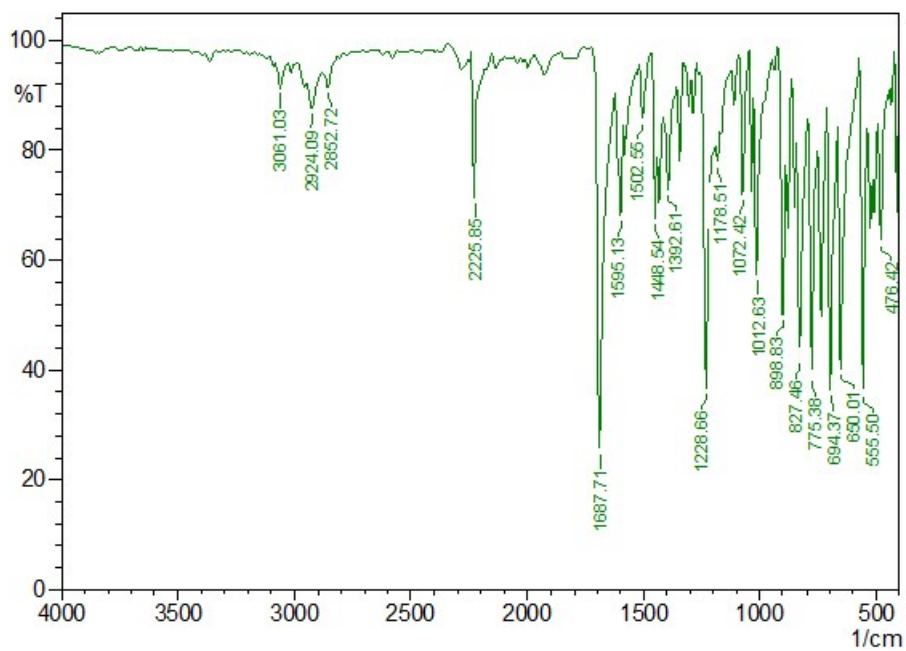

HRMS and IR of compound **6q**.

Signature SIF VIT VELLORE  
NR-517-PCT-10

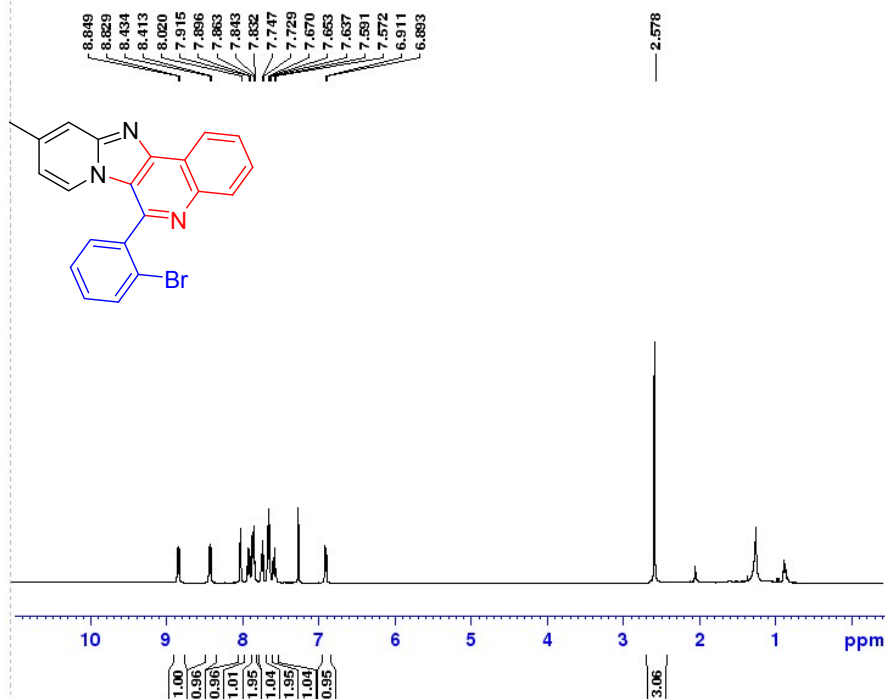

Current Data Parameters  
NAME 2-bromo benzaldehyde  
EXPNO 20  
PROCNO 1

F2 - Acquisition Parameters  
Date\_ 20170510  
Time 7.13 h  
INSTRUM spect  
PROBHD Z108618\_0505 (  
PULPROG zg30  
TD 65536  
SOLVENT CDCl3  
NS 16  
DS 2  
SWH 8012.820 Hz  
FIDRES 0.244532 Hz  
AQ 4.0894465 sec  
RG 127.79  
DW 62.400 usec  
DE 6.50 usec  
TE 297.7 K  
D1 1.0000000 sec  
TD0 1  
SFO1 400.2604716 MHz  
NUC1 1H  
P1 14.25 usec  
PLW1 14.0000000 W

F2 - Processing parameters  
SI 65536  
SF 400.2590097 MHz  
WDW EM  
SSB 0  
LB 0.30 Hz  
GB 0  
PC 1.00

Signature SIF VIT VELLORE

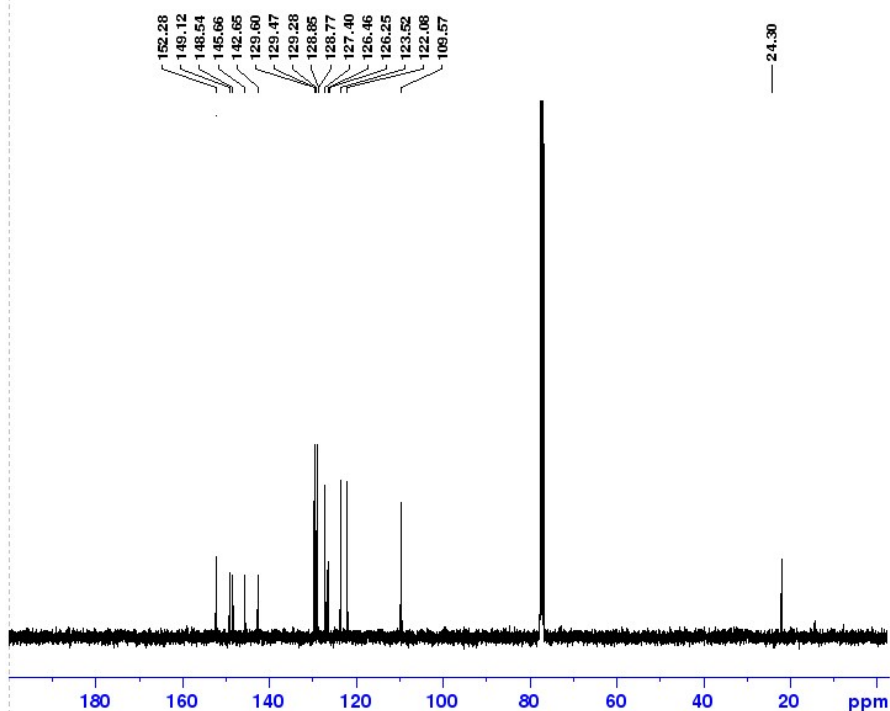

Current Data Parameters  
NAME Derivative-2-Br-Benzal  
EXPNO 10  
PROCNO 1

F2 - Acquisition Parameters  
Date\_ 20170519  
Time 15.30 h  
INSTRUM spect  
PROBHD Z108618\_0505 (  
PULPROG zgpg30  
TD 65536  
SOLVENT CDCl3  
NS 540  
DS 4  
SWH 24038.461 Hz  
FIDRES 0.733596 Hz  
AQ 1.3631488 sec  
RG 156.91  
DW 20.900 usec  
DE 6.50 usec  
TE 299.9 K  
D1 2.0000000 sec  
D11 0.0300000 sec  
TD0 1  
SFO1 100.6550186 MHz  
NUC1 13C  
P1 9.80 usec  
PLW1 58.0000000 W  
SFO2 400.2596010 MHz  
NUC2 1H  
CPDPRG[2] waltz16  
PCPD2 90.00 usec  
PLW2 14.0000000 W  
PLW12 0.35097000 W  
PLW13 0.17654000 W

F2 - Processing parameters  
SI 32768  
SF 100.6449542 MHz  
WDW EM  
SSB 0  
LB 1.00 Hz  
GB 0  
PC 1.40

$^1\text{H-NMR}$  and  $^{13}\text{C-NMR}$  of compound **6r** in  $\text{CDCl}_3$

P-14

Scan: 2009 TIC=7318512 Base=17.8%FS #Ions=2459 RT=11.45

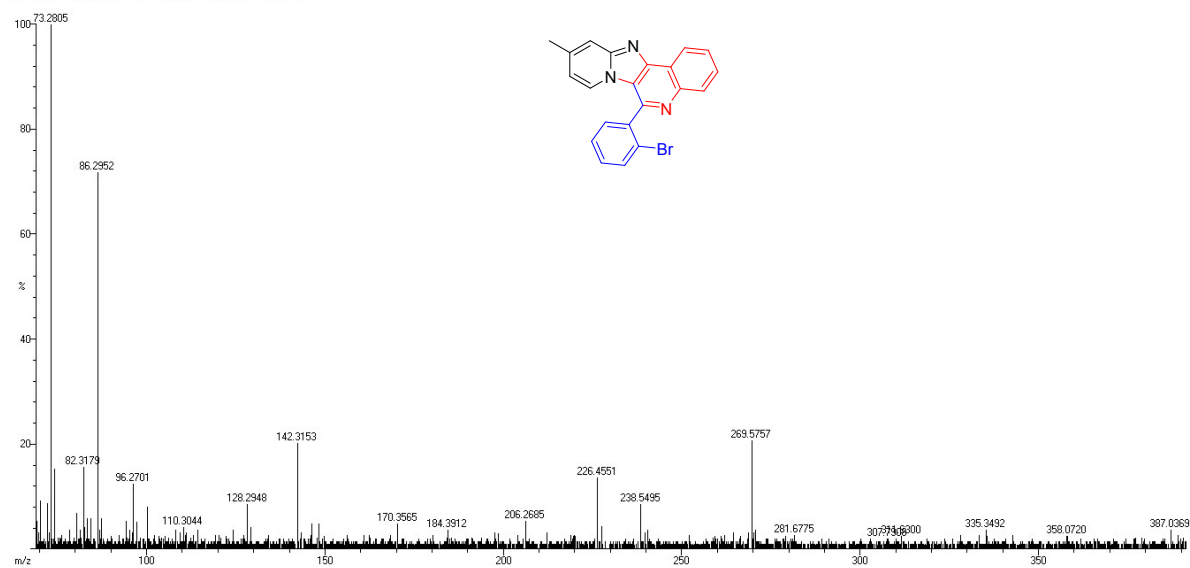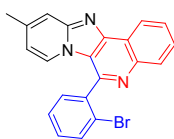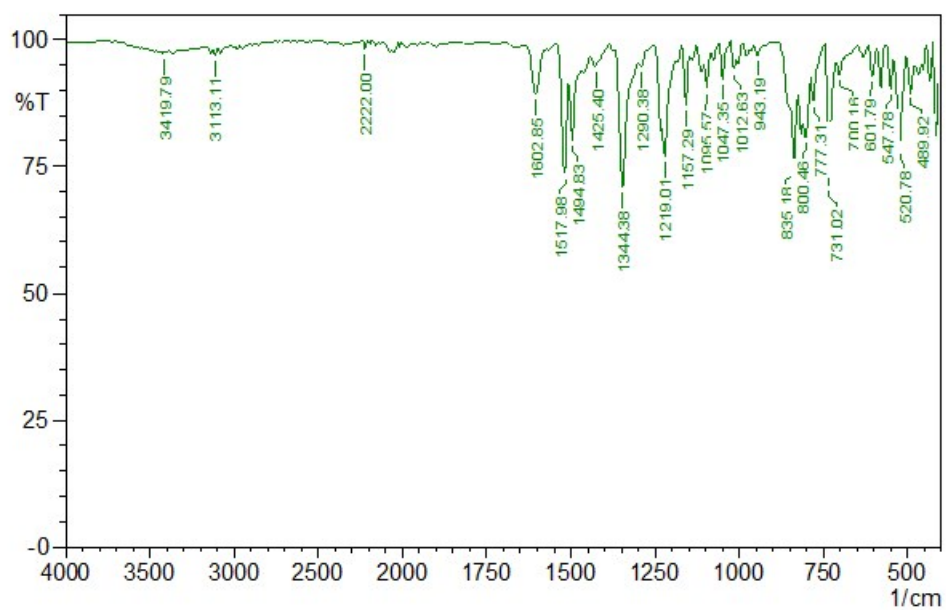

HRMS and IR of compound **6r**.



Signature SIF VIT VELLORE  
NR-317-D2-PCT

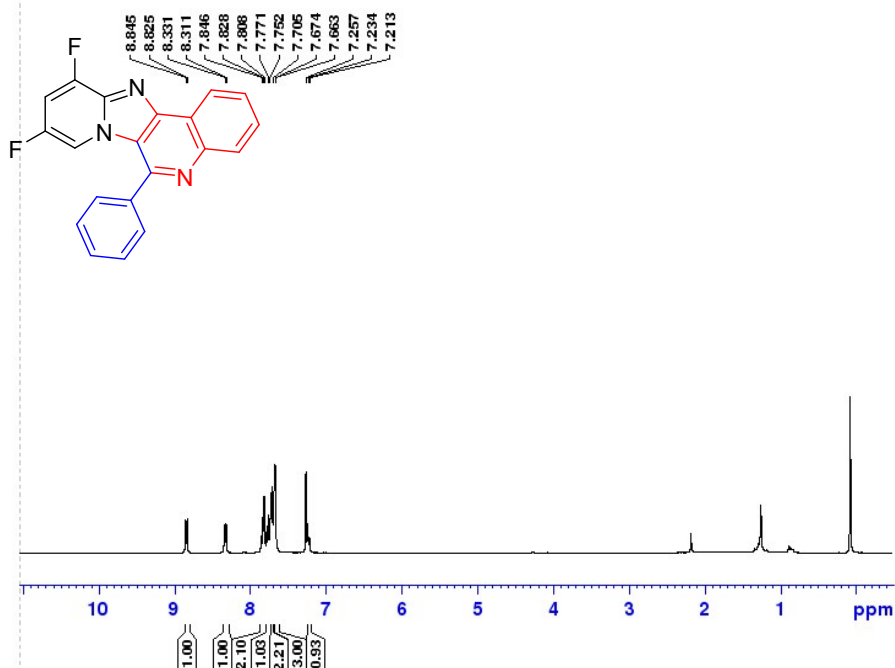

Current Data Parameters  
NAME Derivative -2-benzene  
EXPNO 24  
PROCNO 1

F2 - Acquisition Parameters  
Date\_ 20170325  
Time 14.19 h  
INSTRUM spect  
PROBHD Z108618\_0505 (  
PULPROG zg30  
TD 65536  
SOLVENT CDCl3  
NS 16  
DS 2  
SWH 8012.820 Hz  
FIDRES 0.244532 Hz  
AQ 4.0894465 sec  
RG 156.91  
DW 62.400 usec  
DE 6.50 usec  
TE 297.7 K  
D1 1.0000000 sec  
TD0 1  
SFO1 400.2604716 MHz  
NUC1 1H  
P1 14.25 usec  
PLW1 14.0000000 W

F2 - Processing parameters  
SI 65536  
SF 400.2590109 MHz  
WDW EM  
SSB 0  
LB 0.30 Hz  
GB 0  
PC 1.00

Signature SIF VIT VELLORE

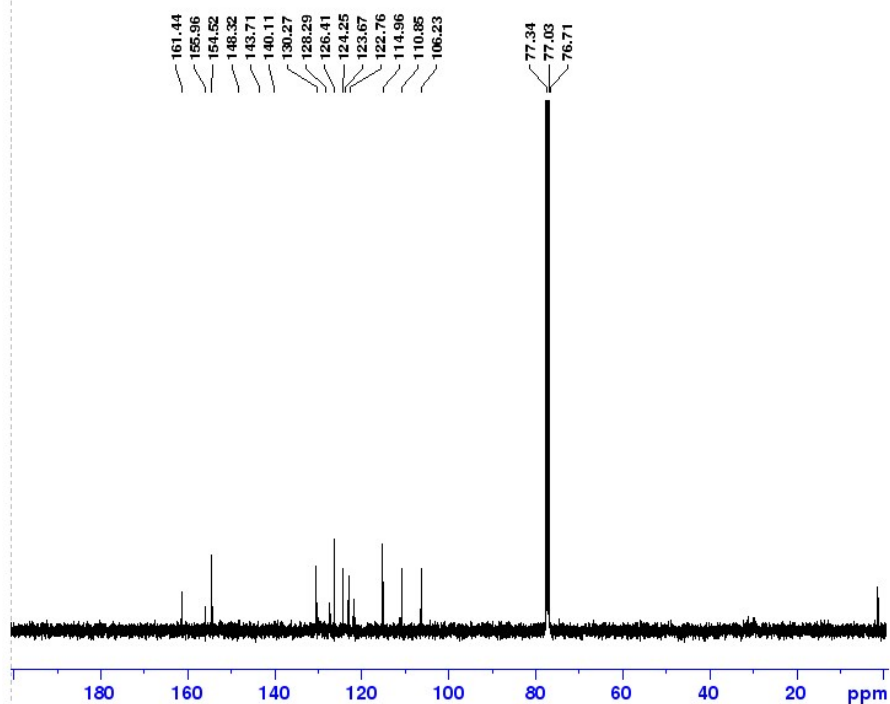

Current Data Parameters  
NAME Derivative-1  
EXPNO 16  
PROCNO 1

F2 - Acquisition Parameters  
Date\_ 20170310  
Time 2.45 h  
INSTRUM spect  
PROBHD Z108618\_0505 (  
PULPROG zgpg30  
TD 65536  
SOLVENT CDCl3  
NS 503  
DS 6  
SWH 24038.367 Hz  
FIDRES 0.23596 Hz  
AQ 7.46314841sec  
RG 111.73  
DW 20.200 usec  
DE 5.50 usec  
TE 158.3 K  
D1 3.0000000 sec  
D11 0.0300000 sec  
TD0 1  
SFO1 100.6550186 MHz  
NUC1 13C  
P1 9.80 usec  
PLW1 58.0000000 W  
SFO2 400.2596010 MHz  
NUC2 1H  
CPDPRG[2] waltz16  
PCPD2 90.00 usec  
PLW2 14.0000000 W  
PLW12 0.35097000 W  
PLW13 0.17654000 W

F2 - Processing parameters  
SI 32768  
SF 100.6449542 MHz  
WDW EM  
SSB 0  
LB 1.00 Hz  
GB 0  
PC 1.40

<sup>1</sup>H-NMR and <sup>13</sup>C-NMR of compound 6s in CDCl<sub>3</sub>.

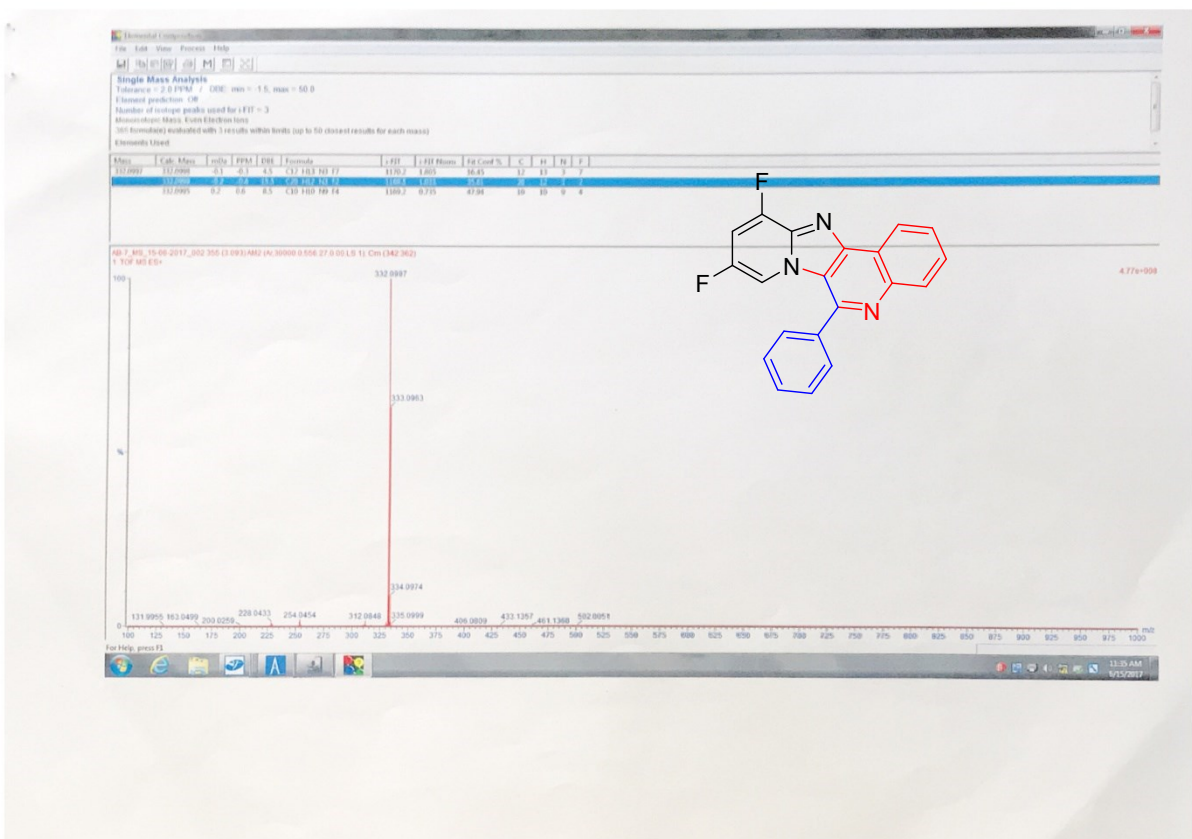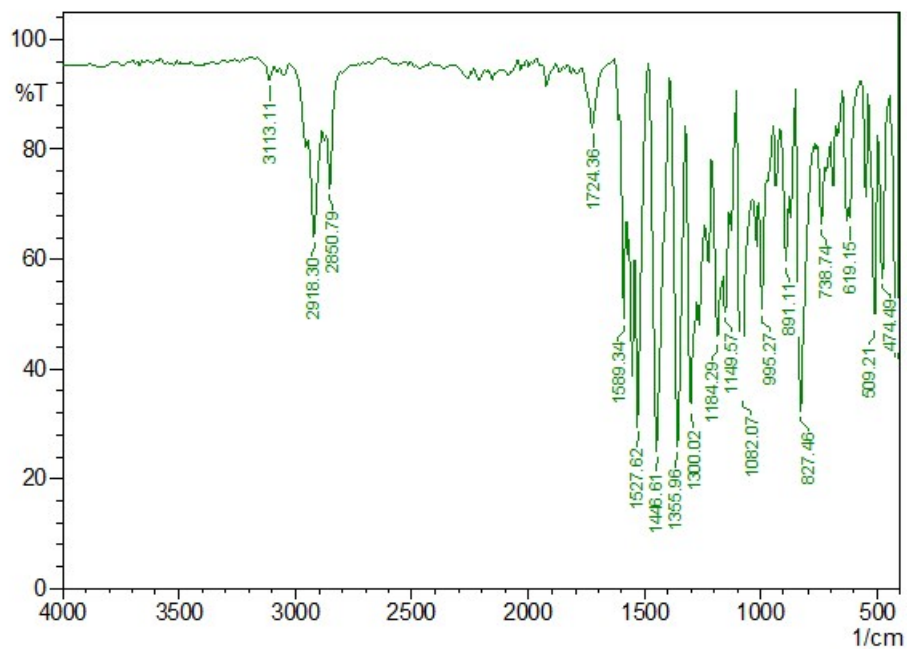

HRMS and IR of compound 6s.

Signature SIF VIT VELLORE  
NR-317-P-2

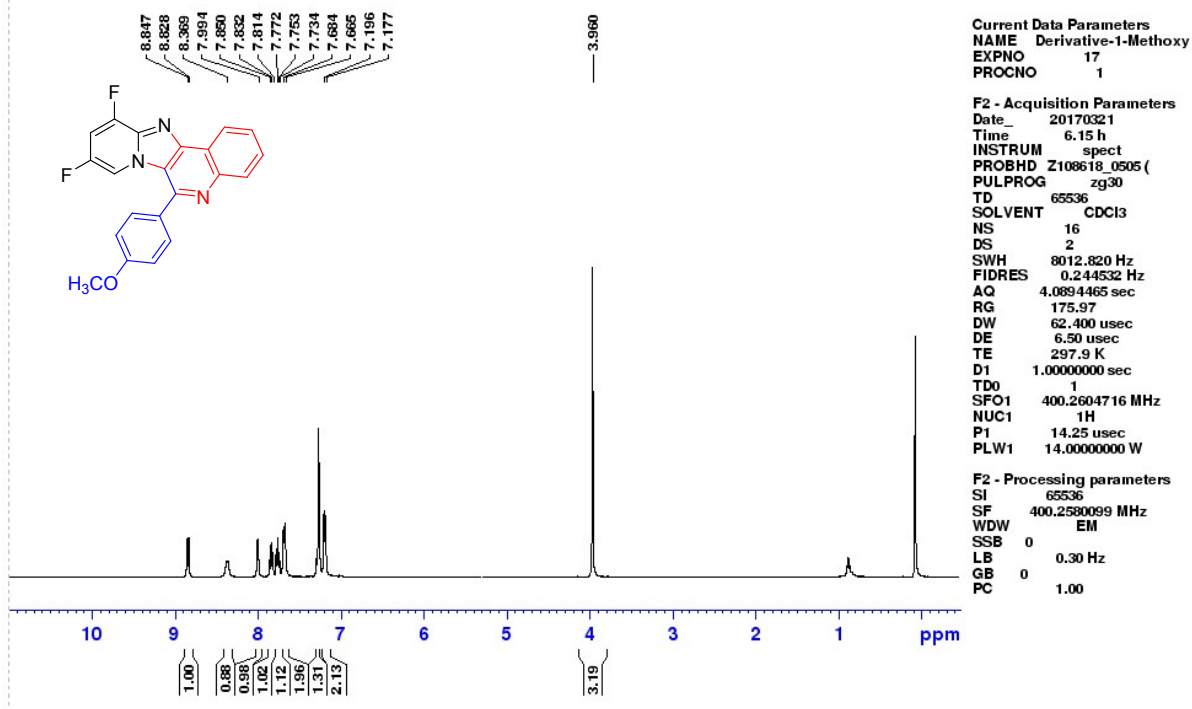

Signature SIF VIT VELLORE  
NR-317-P-2

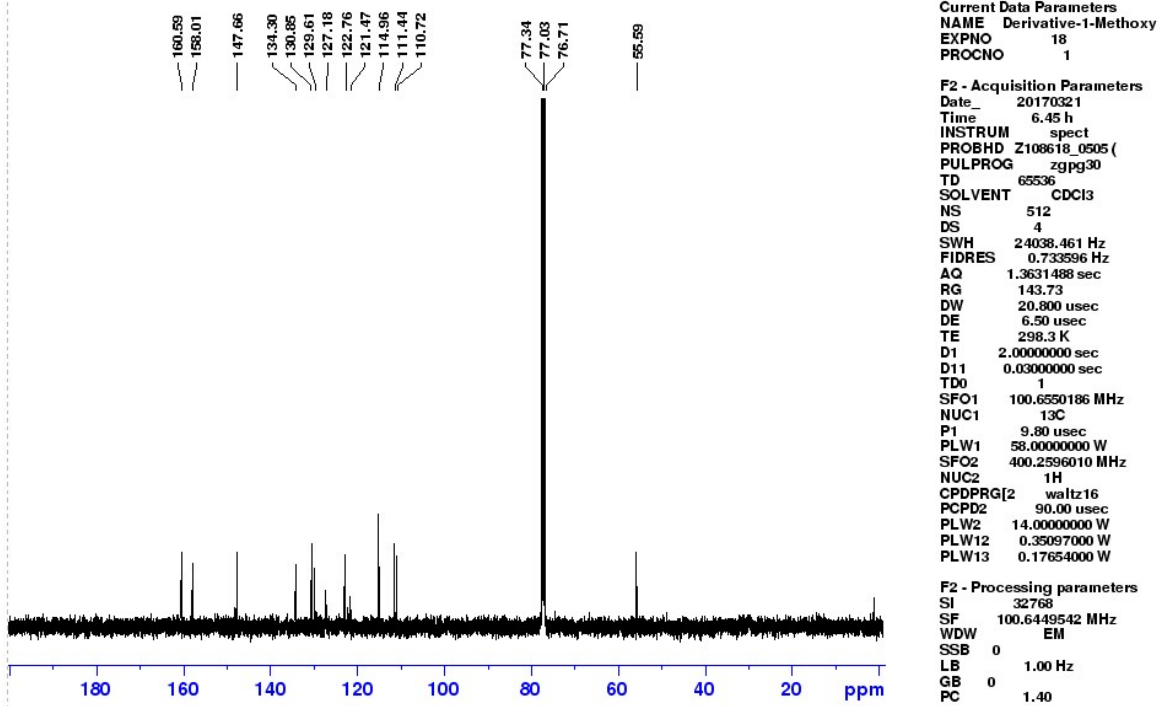

<sup>1</sup>H-NMR and <sup>13</sup>C-NMR of compound **6t** in CDCl<sub>3</sub>.

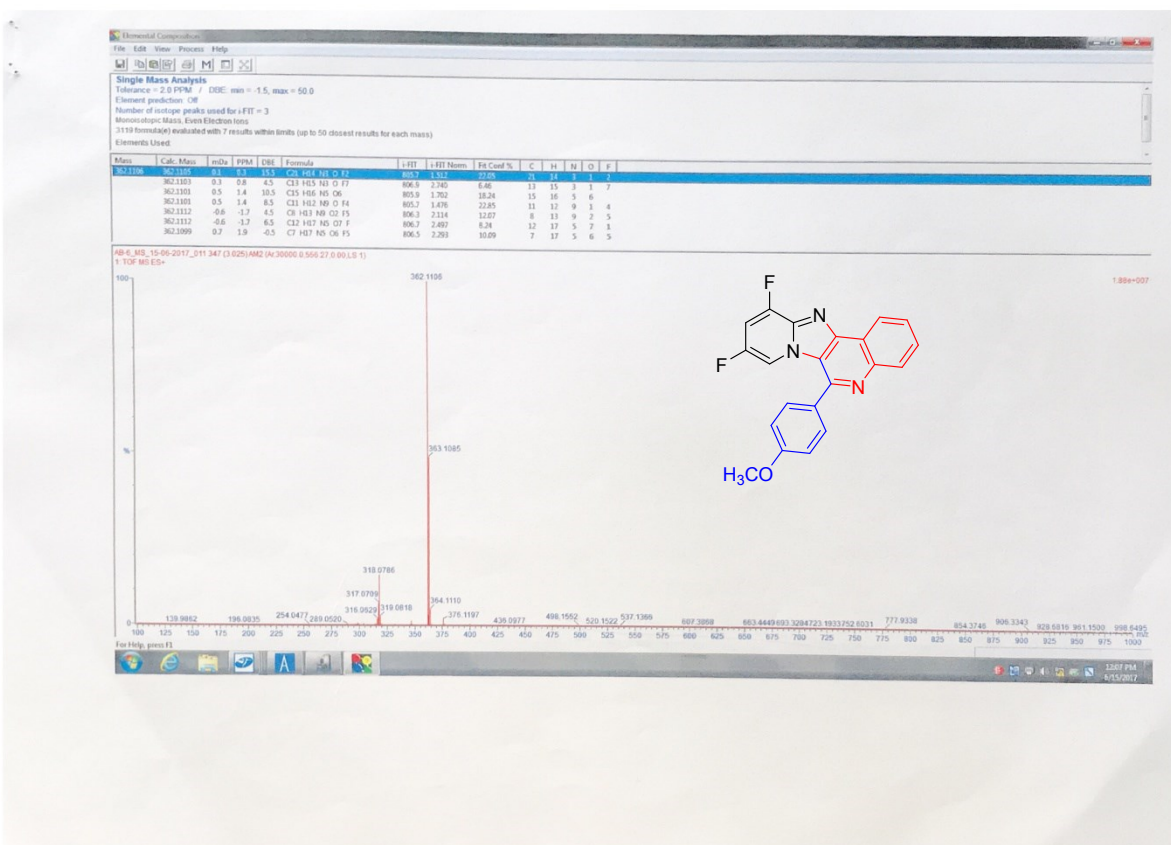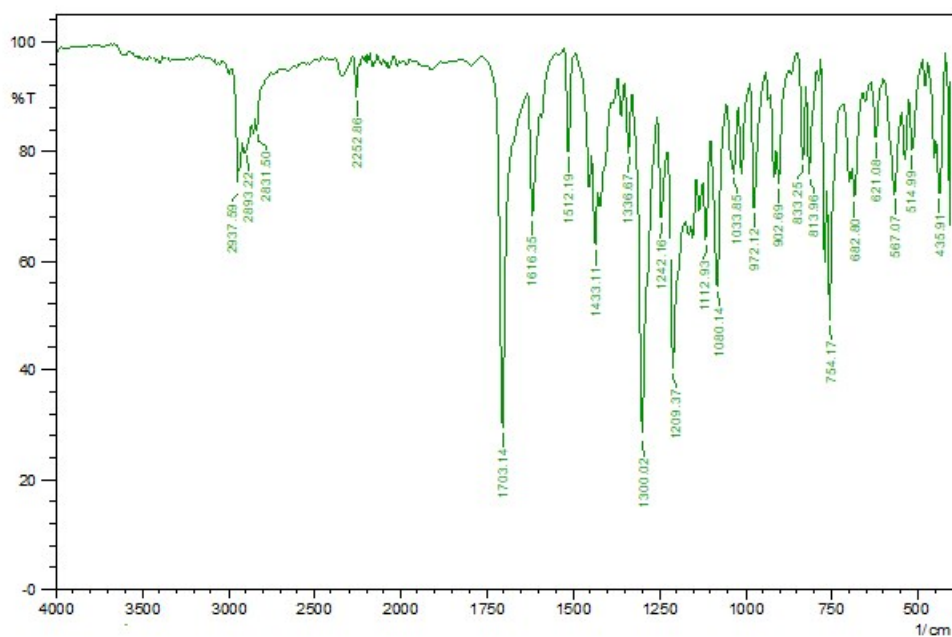

HRMS and IR of compound **6t**.

Signature SIF VIT VELLORE  
NR-1220-FU

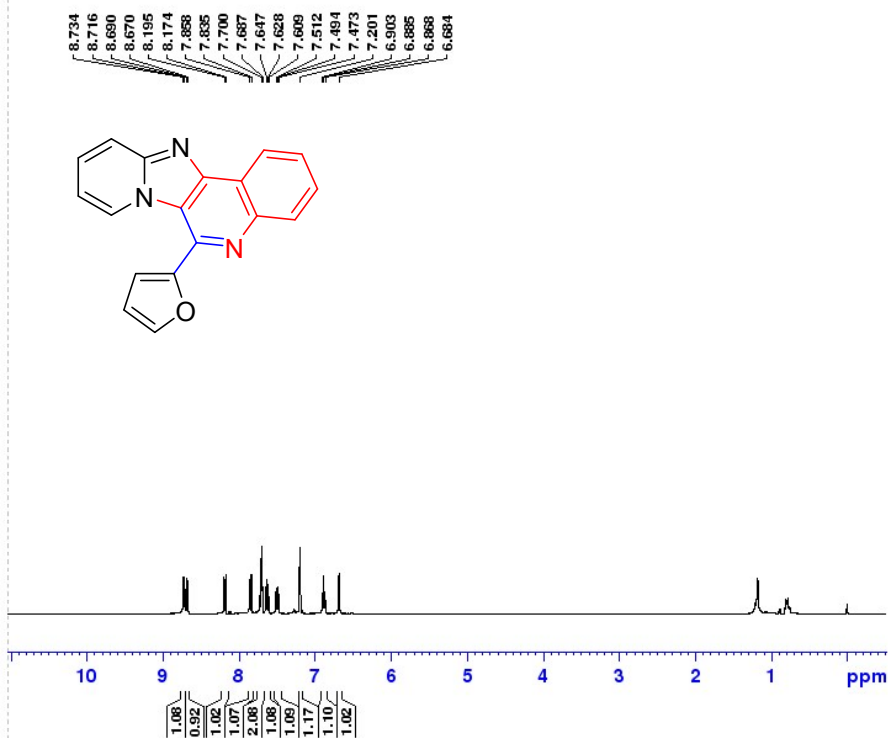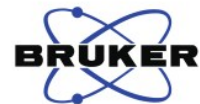

Current Data Parameters  
NAME Furfuraldehyde  
EXPNO 16  
PROCNO 1

F2 - Acquisition Parameters  
Date\_ 20201228  
Time 15.08 h  
INSTRUM spect  
PROBHD Z108618\_0505 (  
PULPROG zg30  
TD 65536  
SOLVENT CDCl3  
NS 16  
DS 2  
SWH 8012.820 Hz  
FIDRES 0.244532 Hz  
AQ 4.0894465 sec  
RG 112.69  
DW 62.400 usec  
DE 6.50 usec  
TE 301.2 K  
D1 1.0000000 sec  
TD0 1  
SFO1 400.2604716 MHz  
NUC1 1H  
P1 14.07 usec  
PLW1 16.0000000 W

F2 - Processing parameters  
SI 65536  
SF 400.2580376 MHz  
WDW EM  
SSB 0  
LB 0.30 Hz  
GB 0  
PC 1.00

Signature SIF VIT VELLORE  
NR-1220-FU

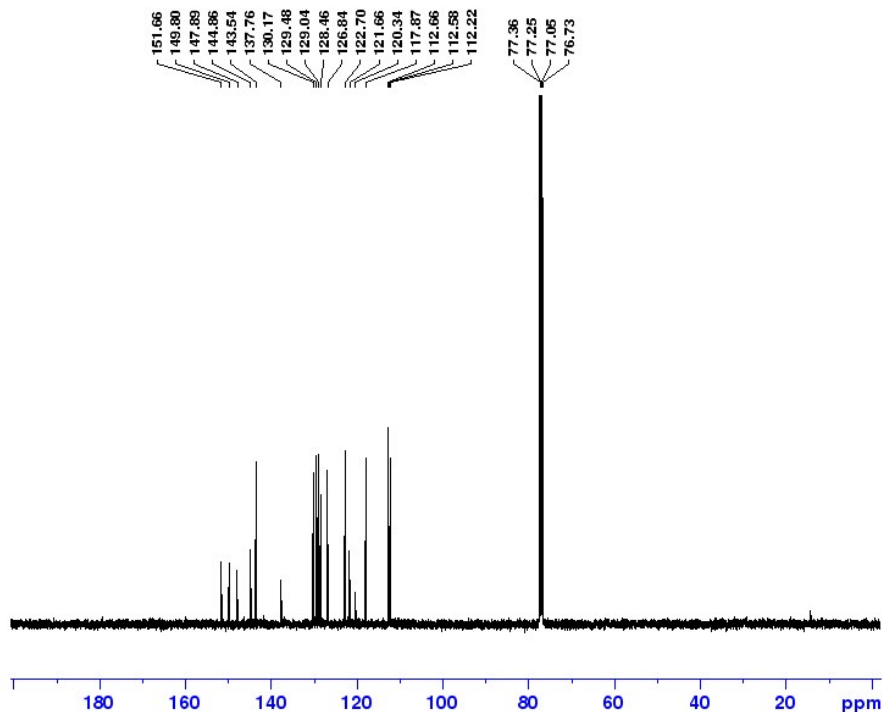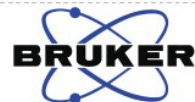

Current Data Parameters  
NAME 29-12-2020  
EXPNO 17  
PROCNO 1

F2 - Acquisition Parameters  
Date\_ 20201228  
Time 15.39 h  
INSTRUM spect  
PROBHD Z108618\_0505 (  
PULPROG zgpg30  
TD 65536  
SOLVENT CDCl3  
NS 512  
DS 4  
SWH 24038.461 Hz  
FIDRES 0.733596 Hz  
AQ 1.3631488 sec  
RG 156.91  
DW 20.800 usec  
DE 6.50 usec  
TE 301.6 K  
D1 2.0000000 sec  
D11 0.0300000 sec  
TD0 1  
SFO1 100.6550185 MHz  
NUC1 13C  
P1 10.52 usec  
PLW1 58.0000000 W  
SFO2 400.2596010 MHz  
NUC2 1H  
CPDPRG[2] waltz16  
PCPD2 90.00 usec  
PLW2 16.0000000 W  
PLW12 0.3910400 W  
PLW13 0.1966899 W

F2 - Processing parameters  
SI 32768  
SF 100.6449540 MHz  
WDW EM  
SSB 0  
LB 1.00 Hz  
GB 0  
PC 1.40

$^1\text{H-NMR}$  and  $^{13}\text{C-NMR}$  of compound **6u** in  $\text{CDCl}_3$ .

Signature SIF VIT VELLORE  
NR-1220-But

8.706  
8.689  
8.667  
8.647  
8.224  
8.204  
7.940  
7.918  
7.724  
7.706  
7.685  
7.635  
7.617  
7.596  
7.575  
7.554  
7.110  
7.084  
7.077

3.472  
3.462  
3.432

1.581  
1.568  
1.544  
1.040  
1.022  
1.005

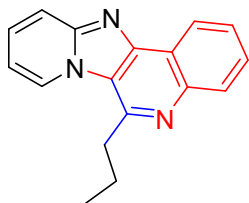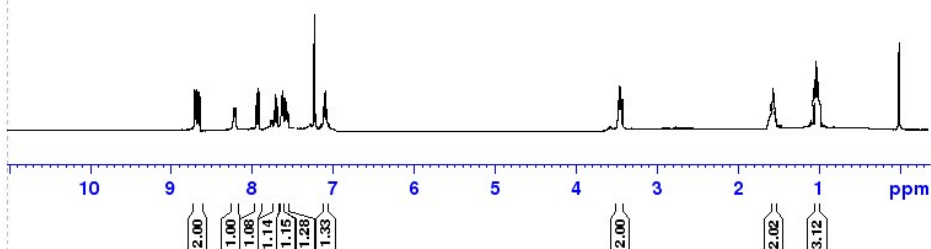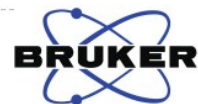

Current Data Parameters  
NAME New folder  
EXPNO 18  
PROCNO 1

F2 - Acquisition Parameters  
Date\_ 20201230  
Time 7.37 h  
INSTRUM spect  
PROBHD Z108618\_0505 (  
PULPROG zg30  
TD 65536  
SOLVENT CDCl3  
NS 16  
DS 2  
SWH 8012.820 Hz  
FIDRES 0.244532 Hz  
AQ 4.0894465 sec  
RG 35.49  
DW 62.400 usec  
DE 6.50 usec  
TE 302.0 K  
D1 1.00000000 sec  
TD0 1  
SFO1 400.2604716 MHz  
NUC1 1H  
P1 14.07 usec  
PLW1 16.00000000 W

F2 - Processing parameters  
SI 65536  
SF 400.2590219 MHz  
WDW EM  
SSB 0  
LB 0.30 Hz  
GB 0  
PC 1.00

Signature SIF VIT VELLORE  
NR-1220-But

171.07  
149.72  
139.19  
129.83  
129.03  
127.45  
126.30  
123.32  
122.63  
121.11  
118.39  
114.01  
113.13

77.36  
77.25  
77.05  
76.73

29.61  
20.95  
14.12

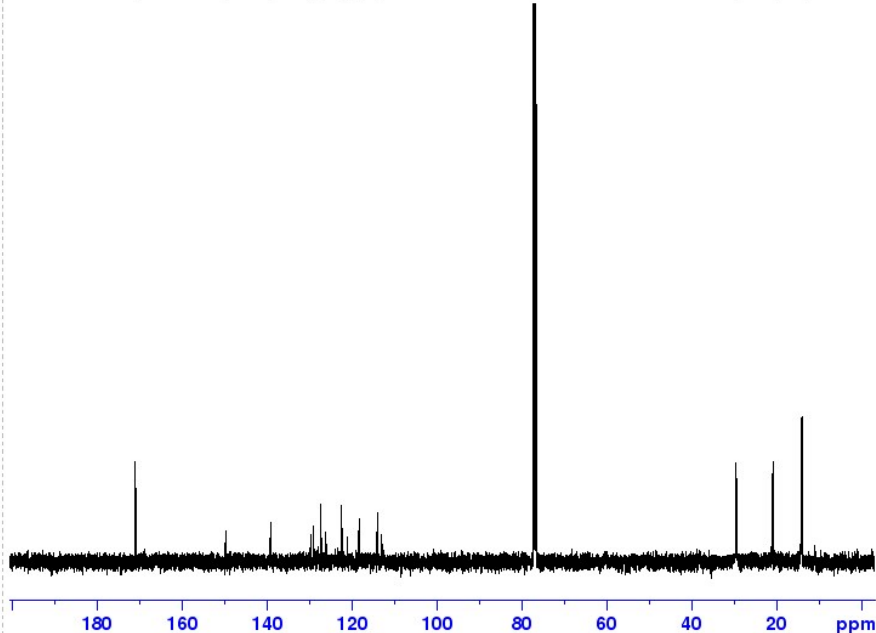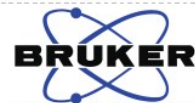

Current Data Parameters  
NAME Butaraldehyde  
EXPNO 19  
PROCNO 1

F2 - Acquisition Parameters  
Date\_ 20201230  
Time 8.09 h  
INSTRUM spect  
PROBHD Z108618\_0505 (  
PULPROG zgpg30  
TD 65536  
SOLVENT CDCl3  
NS 512  
DS 4  
SWH 24038.461 Hz  
FIDRES 0.733596 Hz  
AQ 1.3631488 sec  
RG 112.69  
DW 20.800 usec  
DE 6.50 usec  
TE 302.6 K  
D1 2.00000000 sec  
D11 0.03000000 sec  
TD0 1  
SFO1 100.6550185 MHz  
NUC1 13C  
P1 10.52 usec  
PLW1 58.00000000 W  
SFO2 400.2596010 MHz  
NUC2 1H  
CPDPRG2 waltz16  
PCPD2 90.00 usec  
PLW2 16.00000000 W  
PLW12 0.39104000 W  
PLW13 0.19668999 W

F2 - Processing parameters  
SI 32768  
SF 100.6449540 MHz  
WDW EM  
SSB 0  
LB 1.00 Hz  
GB 0  
PC 1.40

$^1\text{H-NMR}$  and  $^{13}\text{C-NMR}$  of compound **6v** in  $\text{CDCl}_3$ .
